1           **A contiguous *de novo* genome assembly of sugar beet EL10 (*Beta vulgaris* L.).**

3                           **Short title: EL10 sugar beet genome.**

5 J. Mitchell (Mitch) McGrath<sup>1\*</sup>, Andy Funk<sup>2</sup>, Paul Galewski<sup>2</sup>, Shujun Ou<sup>2</sup>, Belinda Townsend<sup>3</sup>,  
6 Karen Davenport<sup>4</sup>, Hajnalka Daligault<sup>4</sup>, Shannon Johnson<sup>4</sup>, Joyce Lee<sup>5</sup>, Alex Hastie<sup>5</sup>, Aude  
7 Darracq<sup>6</sup>, Glenda Willems<sup>6</sup>, Steve Barnes<sup>6</sup>, Ivan Liachko<sup>7</sup>, Shawn Sullivan<sup>7</sup>, Sergey Koren<sup>8</sup>,  
8 Adam Phillippy<sup>8</sup>, Jie Wang<sup>9</sup>, Tiffany Lu<sup>9</sup>, Jane Pulman<sup>9</sup>, Kevin Childs<sup>9</sup>, Anastasia Yocum<sup>10</sup>,  
9 Damian Fermin<sup>10</sup>, Effie Mutasa-Göttgens<sup>11</sup>, Piergiorgio Stevanato<sup>12</sup>, Kazunori Taguchi<sup>13</sup>, Kevin  
10 Dorn<sup>14\*</sup>

12 <sup>1\*</sup>USDA-ARS, 1066 Bogue St., Michigan State Univ., East Lansing, MI USA 48824 (co-  
13 corresponding author: mitchmcg@msu.edu, ORCID ID 0000-0002-7365-9901)

14 <sup>2</sup>Plant Breeding, Genetics, and Biotechnology Program, Michigan State Univ., East Lansing, MI  
15 USA 48824

16 <sup>3</sup>Department of Plant Sciences, Rothamsted Research, West Common, Harpenden, Hertfordshire  
17 AL5 2JQ, UK

18 <sup>4</sup>Los Alamos Nat'l Lab, Biosecurity and Public Health, Los Alamos, NM USA 87545

19 <sup>5</sup>BioNano Genomics, 9640 Towne Centre Drive, San Diego, CA USA 92121

20 <sup>6</sup>SESVANDERHAVE N.V., Industriepark Soldatenplein Zone 2 Nr 15, 3300 Tienen, Belgium

21 <sup>7</sup>Phase Genomics, 4000 Mason Road, Suite 225, Seattle, WA USA 98195

22 <sup>8</sup>Genome Informatics Section, Computational and Statistical Genomics Branch, National Human  
23 Genome Research Institute, Bethesda, Maryland, USA

24 <sup>9</sup>Center for Genomics-Enabled Plant Science, Plant Biology Department, Michigan State Univ.,  
25 East Lansing, MI USA 48824

26 <sup>10</sup>A2IDEA, 674 S. Wagner Rd., Ann Arbor, MI USA 48103

27 <sup>11</sup>EMBL-EBI Strategic Partnership Office, European Bioinformatics Institute, Hinxton,  
28 Cambridge CB10 1SD, UK

29 <sup>12</sup>DAFNAE, University of Padova, Viale Università 16, 35020 Legnaro (PD), Italy

30 <sup>13</sup>Hokkaido Agricultural Research Center, National Agriculture and Food Research  
31 Organization, Shinsei Memuro, Hokkaido, 082-0081 Japan

32 <sup>\*14</sup>USDA-ARS, 1701 Centre Ave, Crops Research Laboratory, Fort Collins, CO 80526. (co-  
33 corresponding author: kevin.dorn@usda.gov)

34

35 The author responsible for distribution of materials integral to the findings presented in this  
36 article in accordance with the policy described in the Instructions for Authors  
37 ([www.plantcell.org](http://www.plantcell.org)) is: Mitch McGrath ([mitchmcg@msu.edu](mailto:mitchmcg@msu.edu)).

38

39 **Key Words:**

40 Genome assembly, genome annotation, *Beta vulgaris*, beet, genome size, read depth mapping,  
41 synteny, LTR, repetitive elements, comparative genomics

42

43

44 **Abstract**

45 A contiguous assembly of the inbred ‘EL10’ sugar beet (*Beta vulgaris* ssp. *vulgaris*) genome  
46 was constructed using PacBio long read sequencing, BioNano optical mapping, Hi-C  
47 scaffolding, and Illumina short read error correction. The EL10.1 assembly was 540 Mb, of  
48 which 96.7% was contained in nine chromosome-sized pseudomolecules with lengths from 52 to  
49 65 Mb, and 31 contigs with a median size of 282 kb that remained unassembled. Gene annotation  
50 incorporating RNAseq data and curated sequences via the MAKER annotation pipeline  
51 generated 24,255 gene models. Results indicated that the EL10.1 genome assembly is a  
52 contiguous genome assembly highly congruent with the published sugar beet reference genome.  
53 Gross duplicate gene analyses of EL10.1 revealed little large-scale intra-genome duplication.  
54 Reduced gene copy number for well-annotated gene families relative to other core eudicots was  
55 observed, especially for transcription factors. Variation in genome size in *B. vulgaris* was  
56 investigated by flow cytometry among 50 individuals drawn from EL10 progeny and three  
57 unrelated germplasm accessions, producing estimates from 633 to 875 Mb/1C. Read depth  
58 mapping with short-read whole genome sequences from other sugar beet germplasm suggested  
59 that relatively few regions of the sugar beet genome appeared associated with high-copy number  
60 variation.  
61

62

## Introduction

63 Humans have used beet (*Beta vulgaris* spp. *vulgaris* L.) as early as the late Mesolithic, initially  
64 as leafy pot herb and for medicinal uses (Biancardi et al. 2012). It was not until the Middle Ages  
65 that the enlarged taproot was widely used as a vegetable. The origin of the enlarged taproot is not  
66 clear, but by the 18<sup>th</sup> century beets were widely used as fodder and fueled the prelude to the  
67 Industrial Revolution in Europe. Sugar beet was selected from lower sucrose fodder beets (6-8%  
68 sucrose fresh weight) from the late 1700's, with the first true sugar beet commercial varieties  
69 available by 1860 (Galon and Zallen 1998). Since then, improvements in sucrose content and  
70 processing quality have been continuous, resulting in an industry average in the US and Europe  
71 approaching 19% sucrose fresh weight (~75% dry weight). Breeding methods for sugar beet are  
72 applicable to the *B. vulgaris* vegetable crop types (table beet/ beet root and leafy chard) and  
73 fodder/ biofuel/ industrial chemical feedstock crop types (McGrath and Panella 2019, McGrath  
74 and Townsend 2015). Public sector sugar beet breeding today focuses generally on crop  
75 protection traits (Panella et al. 2008, 2015). The EL10.1 genome summarized here was recently  
76 interrogated for resistance gene signatures (Funk et al. 2018) and crop-type attributes (Galewski  
77 and McGrath 2020). An alternate assembly, EL10.2, is available but not as well characterized as  
78 EL10.1.

79 *Beta vulgaris* is a basal eudicot in the family Amaranthaceae (Caryophyllales) (Yang et al.  
80 2015). Wild forms are found around European and Mediterranean coastlines and collectively  
81 classified as subspecies *maritima* (Biancardi et al. 2012, Andreello et al. 2016, 2017). There are  
82 no known barriers to cross-fertilization among beet crop and wild types, and the genomes of crop  
83 wild relatives are beginning to be described in detail (del Rio et al. 2019). Most *Beta vulgaris*  
84 types, and all characterized *maritima* types, are diploid. Chromosomes are morphologically  
85 similar at mitotic metaphase, and highly repetitive DNA sequences comprise ~60% or more of  
86 the beet genome (Flavell et al. 1974, Dohm 2014). Each chromosome shows different patterns of  
87 repeat-sequence distribution (Schmidt and Heslop-Harrison 1998, Paesold et al. 2012) supporting  
88 the notion that sugar beet genomes are true diploids (Halldén et al. 1998, Dohm et al. 2014). An  
89 ancient genome triplication appears to be shared with the basal asterid and rosid eudicot clades  
90 (Dohm et al. 2012). A uniform linkage group nomenclature was derived from Schondelmaier and  
91 Jung's (1997) linkage group assignments and made more portable with SSR markers (McGrath

92 et al. 2007). Extensive marker technologies remain proprietary within the commercial sugar beet  
93 breeding sector who supply hybrid seed to growers worldwide.

94 We seek to fill knowledge gaps in understanding of sugar beet traits by completing a genome  
95 framework for beet and then building crop genetic traits into the framework, focusing on crop  
96 quality and preservation traits. Creating highly contiguous genome assemblies is challenging,  
97 especially in plants due to the generally high-repetitive nature of portions of their genomes.  
98 Genome annotation is perhaps more challenging as expressed gene functions are generally  
99 predicted from relatively few physiologically-verified protein functions derived from unrelated  
100 plant taxa on the basis of nucleotide and amino acid sequence similarity. Improved approaches  
101 are becoming available and more commonly used (Jung et al. 2019). Many of these approaches  
102 were used in create the EL10 genome assemblies described here, including long-read length  
103 technologies which can span many (but not all) longer low-complexity repeat regions, optical  
104 mapping which can create larger scaffolds from long-read contig assemblies, and Hi-C which  
105 can link together scaffolds across the genome into chromosome-sized scaffolds. Highly  
106 contiguous assemblies exhibit the full organization of hereditary material, thus little uncertainty  
107 of position and distribution of genetic markers, for instance, allows closer focus on any region of  
108 the genome.

109 Scaffolds of the EL10 assemblies show high concordance with genetic maps and the RefBeet  
110 genome sequence (Dohm et al. 2014), which is an excellent but fragmented genome sequence  
111 assembled using first- and second-generation sequencing technologies. The current work from  
112 less fragmented assemblies used here provide a more comprehensive picture of genome size  
113 variability of sugar beet which surprisingly varies extensively each generation, and global  
114 changes in repeat sequence depth and coverage within and between sugar beet inbreds and  
115 breeding populations. Genome fluidity generates mutations, and assessing whether these  
116 recombinational mutation events are useful for sugar beet improvement, or simply a hinderance,  
117 can be investigated. Further, gene number in beet appears to be uniformly diminished relative to  
118 other eudicots, at least for gene classifiers that are shared among representative angiosperm  
119 genomes. Contiguous genome assemblies will allow routine inter-cultivar comparisons between  
120 accessions that vary for important traits, and thus help deduce casual from associated genomic  
121 features influencing a trait of interest, general performance, or otherwise suggest that an  
122 association is merely an historical coincidence of shared parentage and breeding.

123

124

## Results

125 A five-generation inbred genome of the sugar beet 'C869' (PI 628755) was released as a  
126 genetic stock 'EL10' (PI 689015). C869 is the common seed parent for East Lansing  
127 recombinant inbred populations (McGrath et al. 2005). Five plants from one inbred family  
128 showing no gross phenotypic differences and no polymorphism among 24 selected unlinked SSR  
129 markers (McGrath et al. 2007) were chosen for nuclei isolation, long read sequencing, and  
130 assembly. The resulting assembly, using only one of the five plants, was scaffolded via opto-  
131 physical mapping, and the two assemblies described here share this common backbone. Hi-C  
132 scaffolding was largely able to reduce the number of scaffolds to the haploid chromosome  
133 number in beet ( $n=9$ ), with assembly EL10.2 slightly improved in contiguity over assembly  
134 EL10.1. Insights described below pertain to EL10.1 since the annotation of EL10.2 is on-going.

135 **Sequencing and Assembly:** High molecular weight DNA was isolated from intact gel-  
136 embedded nuclei of true leaves from young seedlings and pooled from the five inbred plants for  
137 long-read sequencing using standard protocols for BAC library construction (Amplicon Express,  
138 Pullman, WA). Eighty-six PacBio SMRT cells yielded 79.3-fold coverage (58,655 Mb) of the  
139 *circa 750 Mb Beta vulgaris* genome size (see below). The Falcon Assembler (version 0.2.2) was  
140 used to assemble long reads (Table 1), initialized with reads exceeding 40 kb in length. The  
141 Falcon assembly resulted in 938 primary contigs, 70.9% with a length greater than 100,000  
142 nucleotides and a total length of 562.76 Mb (Table 2). Both assembly versions (EL10.1 and  
143 EL10.2) relied on this intermediate assembly (e.g. SBJ\_80X\_BN, Table 2). G+C content was  
144 similar between EL10 and RefBeet contigs (35.8% vs. 36.1%, respectively).

145 Scaffolding the Falcon assembly with a BioNano two-enzyme (*Bsp*QI and *Bss*SI) sequential  
146 hybrid optical (physical) map resulted in substantial improvement. The *Bsp*QI optical map was  
147 generated from 141,462 molecules with an average length of 285 kb and labelled to an average  
148 density of 11.8 sites  $\text{kb}^{-1}$ , and the *Bss*SI optical map was generated from 270,071 molecules, also  
149 with an average length of 285 kb, labelled to a density of 7.7 sites  $\text{kb}^{-1}$ . Optical maps were  
150 aligned to PacBio Falcon contigs and the resulting *Bsp*QI and *Bss*SI map lengths were 628 Mb  
151 and 590 MB with N50 contig sizes of 1.99 Mb and 1.21 Mb, respectively. After merging PacBio,

152 *Bsp*QI, and *Bss*SI contigs, the final hybrid genome map consisted of 86 scaffolds with a total  
153 length of 566.8 Mb, and an N50 of 12.5 MB (Table 2).

154 Hi-C Proximity Guided Assembly, using selfed progeny of the individual that was optically  
155 mapped (see below), was applied to the merged PacBio/BioNano assembly (e.g. SBJ\_80X\_BN).  
156 This assembly was polished and gap-filled using a combination of approaches (PBJelly, Arrow,  
157 and Pilon; following Bickhart et al. 2017). The resulting 540.5 Mb assembly consisted of 9  
158 chromosome-sized scaffolds, numbered via Butterfass chromosome nomenclature (Butterfass  
159 1964), and 31 unscaffolded contigs. These comprise the genome assembly version described  
160 here, EL10.1. The 9 chromosome-sized scaffolds (designated Chromosomes below) were  
161 relatively similar in size (mean = 57.8 Mb, std. dev. = 3.9 Mb) (Table 2). Chromosomally-  
162 unscaffolded contigs (n=31, hereafter referred to as Scaffolds) represented 3.9% of the final  
163 EL10.1. A second assembly (EL10.2) was created using a second set of Hi-C reads and the  
164 default Dovetail Genomics HiRise assembly pipeline, starting from the PacBio-BioNano  
165 assembly SBJ\_80X\_BN (Table 2).

166 The EL10.1 genome assembly was not corrected for the differences described below, however  
167 EL10.1 has been used in at least two publications (Funk et al. 2018, Galewski and McGrath  
168 2020), and therefore is important to document. Differences between assemblies have not been  
169 fully annotated and further improvement of the EL10 assembly is likely, thus, the EL10.2  
170 assembly is being reported here simply as a publicly available resource for community  
171 inspection, assessment, and basis for refinement. Initial assessment suggested the EL10.2  
172 assembly appeared to have resolved the major assembly-associated inversions on Chromosomes  
173 7 and 9 (see below), as well as placed the 31 Scaffolds into the larger whole genome  
174 chromosome context (Figure 2), where many unplaced Scaffolds of EL10.1 appeared to be better  
175 placed within the context of Chromosome 5 in EL10.2.

176 **Assessment:** No complete chloroplast or mitochondrial genomes were incorporated into the  
177 EL10.1 assembly, although fragments of both plastid genomes were detected in the EL10.1  
178 assembly. The position of RefBeet 1.2 scaffolds were determined for EL10.1 Chromosomes  
179 (Figure 1). Contigs > 5 kb in length were largely colinear between the two assemblies. Two  
180 small inverted-orientation contigs were evident on Chromosome 7, as were small inverted (e.g.  
181 Chromosome 6) and misplaced segments (e.g. Chromosomes 3 and 7). RefBeet 1.2 was

182 anchored with genetic markers (Dohm et al. 2014), and 345 of these with 100% match identity  
183 across 75 nt or greater were placed in concordant order on the EL10.1 assembly. In addition,  
184 3,279 proprietary SNP markers from the SESVanderhave (Tienen, Belgium) molecular marker  
185 genetic map were placed to the EL10.1 assembly. Most marker orders were highly concordant.  
186 However, a third of the mapped markers were inverted on Chromosome 9, and a complex  
187 rearrangement involving 40% of markers was evident on Chromosome 7 (mapped inversions;  
188 Table 3). Genetic markers also added 9 Scaffolds to five Chromosomes (mapped integrations;  
189 Table 4). Genetic markers used to orient the cytogenetic map (Paesold et al. 2012) also aligned  
190 with the EL10.1 assembly. Chromosomes 1 and 3 were cytogenetically congruent with their  
191 North-South orientation, and the rest were reversed relative to the orientations given in that  
192 publication. Scaffold 5 was located to the South end of cytogenetic Chromosome 5 (Table 5),  
193 consistent with SESVanderhave marker data (Table 4).

194 **Annotation:** Of note, the EL10.1 assembly contained the entire first linkage group described in  
195 beet (Keller 1936), the *R-Y-B* linkage group on Chromosome 2. Each of these genes has been  
196 recently cloned (*R*, for the red alkaloid betalain synthesis by a novel cytochrome P450; Hatlestad  
197 et al. 2012), *Y*, a Myb transcription factor required for production of red color (Hatlestad et al.  
198 2014), and *B* for the bolting gene which determines annual or biennial life habit; Pin et al. 2010,  
199 2012). Both the direction and the distance agree with published genetic map intervals, and the  
200 EL10.1 assembly indicates that the bolting gene is physically located proximal towards the  
201 centromere and the color genes are more distal (Table 6).

202 Results from the MAKER annotation pipeline (Holt and Yandell 2011) conservatively  
203 predicted 24,255 proteins, numerically 88.5% of the 27,421 predicted in RefBeet (Dohm et al.  
204 2014). For functional annotation, three sources were used, in the priority: 1) UniProt, 2) Pfam-A,  
205 and 3) Uniref90. If no functional annotation was found in these three highly curated sets,  
206 predicted proteins were assigned to the class of 'hypothetical' proteins. Gene model  
207 completeness was checked using BUSCO (Table 7) (Simão et al. 2015). A higher proportion of  
208 missing BUSCO's was seen in EL10.1 than either RefBeet 1.1 or Arabidopsis. Overall, protein  
209 coding gene predictions covered a relatively small proportion of the assembled EL10.1 genome  
210 (39,161,207 nt; 7.2%). GC content of predicted coding genes was marginally higher than that of  
211 the whole genome (41.1% vs. 35.8%, respectively). Predicted proteins were named using the  
212 underlined characters in the key: EL10 / annotation version A / chromosome or scaffold number



213 / genomic in origin / a sequential number / and appended with .1 to signify that only one isoform  
214 was considered at this level of analysis (e.g. EL10Ac7g16740.1).

215 The number of MAKER annotations ascribed across Chromosomes of EL10.1 was relatively  
216 consistent (mean = 2,559, stdev = 173.8), but highly variable between Scaffolds (mean = 44.0,  
217 stdev = 47.6) (excluding Scaffolds 23, 29, 30, and 31 for which no gene models were predicted)  
218 (Table 8). A total of 3,940 gene models had no functional annotation among curated comparative  
219 databases (and thus were designated hypothetical), and these were also evenly distributed among  
220 Chromosomes but not necessarily Scaffolds (Table 8). Fewer than 55% of gene models were  
221 considered unique in the sense their curated-database annotations only occurred once in the list  
222 of gene models (Table 8), and thus, at this level of analysis, more than 45% of predicted genes  
223 could be members of gene families.

224 Self-synteny of MAKER gene models with the EL10.1 genome sequence was explored using  
225 the CoGe SynMap platform (Lyons et al. 2008). Few internal syntenies were detected. Mean  
226 copy number of the 2,327 discovered tandem gene models was 2.82 (stdev = 1.96), and 65.8% of  
227 these tandem duplications were two copies. For syntenic regions with at least 5 matches in a span  
228 of 20 gene models (encompassing 1,858 genes in 268 syteny blocks), average Kn/Ks values  
229 were all less than 1, suggesting stabilizing selection for genes in these blocks. For individual  
230 gene pairs, only five gene pairs had Kn/Ks values >1 (suggesting diversifying selection) but only  
231 two of these pairs had interpretable annotations. EL10Ac6g14284.1 & EL10Ac9g20883.1 were  
232 predicted as Clathrin heavy chain 2 genes (i.e., vesicle trafficking) and EL10Ac1g01568.1 &  
233 EL10Ac5g12109.1 were predicted SET Domain Protein genes (i.e., chromatin structure  
234 modulation).

235 A comparative gene annotation perspective was gained using the MapMan4 ontology of plant  
236 proteomes (Schwacke et al. 2019). EL10.1 MAKER gene models were placed in 99.6% of 4,145  
237 ontologies assigned to one of 28 'bins' (infrequently allowing for assignment to more than one  
238 bin), organized in a hierarchal, conceptual, plant-specific context (e.g., Photosynthesis, Cell  
239 cycle, Hormones, etc.). Where possible, each bin resolves to a gene from a high-quality genome  
240 assembly in the Mercator4 web implementation of MapMan4. Specific comparisons for each of  
241 the 4,127 EL10.1 occupied terminal, termed 'leaf', bins were made with five other angiosperms  
242 (e.g., *Arabidopsis thaliana*, *Oryza sativa*, *Brachypodium distachyon*, *Solanum lycopersicum*, and

243 *Manihot esculenta*). Most EL10.1 predicted proteins in the found set were placed in one (or  
244 more) MapMan4 leaf bins (Table 9). Since the MapMan4 ontology is hierarchal, the number of  
245 genes in each leaf bin was averaged for all five angiosperms, and compared to EL10.1.  
246 Surprisingly, the number of genes in the EL10.1 gene set was 69% that of the average of five  
247 angiosperms (Table 9).

248 Enrichment analysis can shed light on biological processes that may have assumed greater or  
249 lesser importance in the evolutionary success of a lineage. Given the general reduced gene copy  
250 number in EL10.1, genes whose copy number equaled or exceeded the mean of five angiosperms  
251 were tentatively considered as enriched, and those that were substantially lower than the overall  
252 mean of EL10.1 were considered as reduced. EL10.1 appeared particularly depauperate in at  
253 least two top-level ontologies; Cellular respiration (Bincode 2) and Phytohormones (Bincode 11)  
254 (Table 9). Equal or over-represented ontologies included DNA Damage Response (Bincode 14)  
255 and Coenzyme metabolism (Bincode 7) (Table 9).

256 Proteome content of the five averaged angiosperms relative to EL10.1 was gauged for missing  
257 members, which could suggest regions in EL10.1 that were not assembled, genes that were not  
258 annotated, or perhaps reflect biological divergence or biochemical alternatives that beet followed  
259 during its evolution. Not detected in EL10.1 were 154 genes that were present in at least one  
260 copy in each of the five angiosperms. Missing annotations were assignable across all 28 top-level  
261 bins, with the exception of Bincode 8 (Polyamine metabolism) (Table 10). In this set, mean copy  
262 number was low (1.6 genes per leaf bin) in the five taxa, and failure to assemble or annotate a  
263 low-copy number genes in EL10.1 was possible. However, in 12 cases, each of the five other  
264 plants had small gene families (mean copy number = 3.7 genes per family) but no EL10.1  
265 homologue was annotated, which seemed less probable that all would have been missed during  
266 assembly and annotation, thus their functions in beet may have been dispensable, their genes  
267 diverged, or their functions assumed by other genes.

268 Remaining annotations were surveyed for potential biological interest, but not exhaustively  
269 evaluated (Table 11). Under-represented genes in 'Cell wall' (Bincode 21) included those  
270 involved with hemicellulose, lignin, cutin, and suberin metabolism, as might be expected from  
271 selection for a mechanically-sliced root crop for sucrose extraction (e.g., less knife wear during  
272 processing, which is a trait that has not necessarily been under conscious selection).

273 Phytohormone representation was low across all second-level categories, especially salicylic acid  
274 (Bincode 11.8). External stimuli response (Bincode 26) was rich in drought response but poor in  
275 biotic stress response genes. Multi-process regulation (e.g., integration of development with  
276 response-to-environment) was over-represented by the TOR signaling pathway (Bincode 27.2)  
277 and under-represented in the SnRK1 metabolic regulator system (Bincode 27.3). RNA  
278 biosynthesis (Bincode 15) was generally over-represented, however Bincode 15.8  
279 (transcriptional repression) was greatly under-represented. Overall, 138 leaf bins were similar or  
280 over-represented and 447 were under-represented in EL10.1.

281 Transcription factor genes (Bincode 15.7) were under-represented overall. On average, there  
282 were ~10 fewer genes in EL10.1 than the average of five other angiosperms. Transcription factor  
283 genes with a >50 gene deficiency between the angiosperm average and EL10.1 included MADS  
284 box, NAC, MYB, and bHLH transcription factors (Table 12). Most of the transcription factor  
285 classes showing larger deficiency in copy number were members of larger gene families. Few  
286 transcription factor classes were equally- or over-represented, and most of these were from gene  
287 families characterized by lower copy number (Table 12). However, the FAR1 transcription factor  
288 class was abundant in EL10.1, and highly variable in the group of five other angiosperms (Table  
289 12). It is likely that each of these differences in transcription factor copy number has potential to  
290 impact plant phenotype, development, and/ or response to the environment.

291 **Genome size:** Reported genome sizes (714 - 758 Mb; Arumuganathan and Earle 1991, derived  
292 from estimates for one plant each of table and sugar beet, respectively) and assembled genome  
293 sizes of sugar beet (~540.5 - 566.6 Mb, Table 2) may be explained by failure to assemble  
294 repetitive sequence arrays completely. To better assess genome size as a gauge of the  
295 completeness of assemblies in *Beta vulgaris*, an additional 50 independent cytometrically-  
296 determined nuclear DNA content estimates were obtained from four unrelated germplasm  
297 accessions; two traditional out-crossing progenies and two from progeny of deeply inbred  
298 accessions of EL10 and an inbred table beet derived from germplasm 'W357B'. Nuclear DNA  
299 content estimates of these materials ranged from 633 Mb to 875 Mb, as estimated from at least  
300 four biological replicates from each accession (at least 20 from inbreds) with four technical  
301 replicates performed per biological replicate (Table 13). Overall, genome size between crop  
302 types was not statistically different (sugar beet, n = 120, mean = 729.0 Mb/1C, std. dev. = 51.2;  
303 table beet, n=80, mean = 742.3, std. dev. = 52.8; p = 0.079). Average genome size differences of

304 each sugar beet accession were significantly different from one another ( $p < 0.001$ , means and  
305 dispersion values are presented in Table 13), and only the difference between sugar beet '5B  
306 sugar breeding population' and Inbred Table beet was not significantly different than the other  
307 two sugar beet accessions. Inbreds showed a statistically-significant smaller average genome size  
308 (Table 13: inbreds, mean = 728.5 Mb/1C, out crossed, mean = 764.9 Mb/1C,  $p = 0.0002$ ), and at  
309 least 2-fold higher variation than out-crossers (Table 13). The average cytometrically-determined  
310 genome size of all tested accessions was 734.3 Mb (stdev = 50.3 Mb). The smallest  
311 cytologically-estimated DNA content (633 Mb), coincidentally present in the progeny of EL10,  
312 closely approximated EL10's optical map length of 628 Mb, and curiously, the average genome  
313 size of EL10's progeny was 88 Mb larger than the assembled EL10.1 genome. Thus, average  
314 genome size appeared to increase over a single generation of selfing, and to an extent that  
315 reflected the size range observed within the species. This also implied that genome size also  
316 decreased at some point during the generation of these materials.

317 **Repetitive element content estimation:** Plant genomes are characterized by high repetitive  
318 sequence content, found either as tandem arrays or as multiple copies distributed throughout the  
319 genome (Bennetzen and Wang 2014). More than 180,000 named repetitive elements (as deduced  
320 by RepeatMasker) were placed on the EL10.1 assembly (Table 14). DNA class transposable  
321 elements were the most frequent (58.1%), which appears to be at odds with RefBeet (Dohm et al.  
322 2014), and LTR elements the next most frequent class (36.0%) of annotated transposable  
323 elements (Table 7A). Numbers and types of LTR elements were estimated similarly using  
324 RepeatMasker and LTR\_Retriever (Ou and Jiang 2018). However, distribution of the filtered  
325 high-confidence intact LTR\_Retriever-predicted Gypsy and Copia elements (Table 14B) showed  
326 Copia elements generally more frequent towards the ends of Chromosomes and Gypsy elements  
327 biased towards centromeric regions (Figure 4).

328 Repeats associated with centromeric histone variants have been characterized in beets (Kowar  
329 et al. 2016), and these consist of the Gypsy element Beetle7 as well the pBV class of major  
330 satellites (Table 14C). High-similarity Beetle7 sequences (90% identity over 1,000 nt or better)  
331 were located on all Chromosomes and eight of the Scaffolds. The 35S and 5S ribosomal RNA  
332 genes are also tandemly arrayed in beets (Paesold et al. 2012). The 35S arrays in EL10.1 were  
333 localized to Chromosome 2, as expected, and also to Scaffolds 7 and 19. The 5S array localized  
334 to Chromosome 4, also as expected, and to Scaffold 11. Only one canonical plant telomere array

335 (TTTAGGG)<sub>n</sub> greater than three tandem copies was found in the EL10.1 assembly, near the end  
336 of Scaffold 5. However, terminal repeat arrays defined by the major satellite class pAV  
337 (Dechyeva and Schmidt 2006) were found near the ends of most Chromosomes, except at one  
338 end each of Chromosomes 1, 5, 7, and 9 (Table 14D). pAV arrays were seen on each of these  
339 except Chromosome 1, where the South terminus appeared absent. Evidence suggests  
340 Chromosome 5 South is Scaffold 5, Chromosome 9 may have a pericentric inversion or an  
341 assembly artifact that misplaced Chromosome 9 South, and complex inversions in Chromosome  
342 7 may have failed to accurately assemble the North terminal repeat region (these appeared to  
343 have been resolved in the EL10.2 assembly). Notably, interstitial pAV arrays were evident in  
344 both Chromosomes 5 and 7 (Table 14D).

345 Tandem repeats (unit length 500 nt or less assessed with Tandem Repeat Finder) were evenly  
346 spread across the EL10.1 assembly (Table 15), with an average of 630.4 repeats Mb<sup>-1</sup> (stdev =  
347 19.3) across Chromosomes, and similar for Scaffolds but with 25-fold higher variation (Mean  
348 661.0 repeats Mb<sup>-1</sup>, stdev = 460.8). Shorter repeats were more frequent, and the most frequent  
349 size class was 21 nt (23,163 instances). Size classes of tandem repeats may reflect the  
350 predominant repeat unit size for centromeric sequence in a species (Melters et al. 2013), and for  
351 EL10.1, the most frequent repeat size above 100 nt was 160 nt (781 copies), followed by 170 nt  
352 (382 copies) (Figure 5). Relatively high numbers of repeats (67-134 copies) in the 314-325 nt  
353 repeat unit size range were evident, as might be consistent with a heterodimeric model of  
354 centromere repeats (Melters et al. 2013).

355 Assembly continuity was assessed using the LTR Assembly Index (LAI) (Ou and Jiang 2018).  
356 After adjusting for the amplification time of LTR-RTs, the whole-genome LAI of the EL10  
357 assembly was estimated to be 13.3, which is considered reference quality and improves upon the  
358 RefBeet assembly (LAI = 6.7) (Figure 6). Thus, the EL10.1 sugar beet genome assembly  
359 appeared to be largely complete with respect to repetitive element landmarks and assembled in a  
360 largely congruent fashion with respect to genetic markers.

361 **Read count mapping:** Read depth variation provided a means to compare accessions using  
362 readily available and deeper coverage short reads. Low variation in read depth suggests relatively  
363 even distribution of coverage across assembly coordinates, while higher variation suggests  
364 regions of low sequence complexity that may not have assembled in a consistent fashion,

365 perhaps contributing to differences in genome size between cytometry and assembly estimates.  
366 Five independent Illumina-derived read sets were read mapped to the EL10.1 genome assembly,  
367 one from EL10 and one each from four other sugar beet germplasms (including two EL10  
368 relatives and two unrelated germplasms). Overall, more than 99.6% of EL10's cleaned reads  
369 mapped to the EL10.1 assembly, with relatively even coverage (e.g. ~ 36 reads per assembled  
370 nucleotide), but Scaffold coverage was slightly less and the standard deviation was 22-fold  
371 higher. Similar results were evident in the other four germplasms (Table 16). There appeared no  
372 'degree-of-relatedness' discrimination between disparate germplasm at this level of analysis, as  
373 EL10 relatives showed as much overall difference in read-depth variation as individuals drawn  
374 from unrelated populations (Figure 7).

375 High read-depth locations were localized using a conservative, computationally facile, and  
376 relatively crude sequence-independent approach. High read-depth locations were defined as a  
377 region of 5 kb with average per-base read mapping depth above 500 in one or more of the five  
378 tested germplasms (indexed from the lower nucleotide position of the EL10.1 assembly, Figure  
379 8). This binning approach is conservative in the sense that most highly repetitive elements are  
380 shorter than the 5 kb window size used, but provided a computational advantage for an initial  
381 assessment whether changes in genome size could crudely be restricted to specific genomic bins,  
382 or were otherwise more or less independently distributed across the genome. The difference  
383 between C869\_25 (i.e., the base genotype for EL10 and C869\_UK) and each other accession  
384 flagged 47 such bins along Chromosome 1. Each flagged bin in each of the five germplasms  
385 occurred predominantly in the same places on Chromosome 1 (Figure 8). Most of these bins  
386 were occupied by Gypsy or Copia LTRs, however Bin 44,615,000 was occupied by chloroplast  
387 sequence (Sequence ID: KR230391.1) and Bins 8,100,000, 22,360,000, and 22,365,000 were  
388 occupied with mitochondrial sequences (Sequence ID: FP885845.1). It is not unusual to find  
389 plastid sequences within plant genomes (Pichersky et al. 1991), and plastid sequence read-depths  
390 are likely subject to external influences (e.g. plant growth and DNA isolation methods). The  
391 large differences in the remaining read-depth estimates at specific sites suggests that copy  
392 number changed since a last common ancestor. In the case of C869\_UK and EL10, two  
393 generations of selfing had elapsed, and here differences were localized to 8 of the 47 bins on  
394 Chromosome 1 (Figure 8). These sites have the potential to contribute to intra-specific genome  
395 size variation. Further evaluation of such sites across the genome in a more precise sequence-

396 specific fashion (e.g., not binned) may help deduce special features related to their lability and  
397 whether changes in genome size at this level of resolution have phenotypic effects.

398 **Broader synteny:** Caryophyllales members spinach (*Spinacea oleracea*), grain amaranth  
399 (*Amaranthus hypochondriacus*), and quinoa (*Chenopodium quinoa*) have annotated genome  
400 assemblies that were used to compare with EL10.1 (Yang et al. 2016, Lightfoot et al. 2017,  
401 Jarvis et al. 2017, respectively; note that quinoa and amaranth are each amphidiploid).  
402 Chromosome 4 synteny appeared maintained in chromosome-sized blocks among  
403 Caryophyllales, as well as *Vitis vinefera* to a lesser extent, but not *Arabidopsis thaliana*, as  
404 outgroup representatives of the Rosids (Figure 9). Chromosome 1 synteny also appeared  
405 relatively conserved in chromosome-sized blocks among the Caryophyllales, with the exception  
406 of the spinach assembly version used here, which will likely improve in the future. Elements of  
407 Chromosomes 2, 6, and 9 were found in extended blocks in quinoa and amaranth, but also not  
408 spinach. Extended synteny for Chromosomes 5 and 8 were evident in quinoa but were not as  
409 extended in amaranth, while extended blocks for Chromosomes 3 and 7 were present in  
410 amaranth but not as well maintained in quinoa. Genome evolution within the Caryophyllales  
411 produced significant genomic variation in chromosome number, number of syntenic regions, and  
412 size of syntenic regions relative to beet (Table 17).

413

414

## Discussion

415 A high-quality *de novo* assembly of the sugar beet genome was created. The EL10.1 assembly  
416 contains most of the 'EL10' genome organized into nine linkage groups plus 31 extra unplaced  
417 scaffolds. Most scaffolds contain predicted genes, and many were able to be placed in context of  
418 the larger chromosome-sized assemblies using genetic markers. Ends of chromosomes were  
419 captured to some degree, however additional work will be required to finish the EL10 genome  
420 assembly to exacting standards. Efforts to this end are underway and it should be noted that the  
421 EL10.2 assembly appears to resolve at least the major assembly-induced inversions evident of  
422 Chromosomes 7 and 9. Genome assembly is fraught with uncertainty. In most cases, there is no *a*  
423 *priori* information to gauge the completeness and correctness of an assembly. In this case, the  
424 fortuitous availability of a published sugar beet assembly (Dohm et al. 2014) allows for  
425 comparisons, however EL10 provides an independent perspective on the organization of the beet

426 genome. The major difference between the two studies is that the sequencing technologies have  
427 improved to provide longer range scaffolding resulting in a substantially improved contiguity of  
428 sugar beet genome assembly. Such improvements also presumably better reflect copy number  
429 variations.

430 Long reads alone are currently insufficient for a high-quality assembly of a plant genome of  
431 moderate to large genome size. Beet might be considered a moderately-sized plant genome. The  
432 addition of an opto-physical map to long reads alone provided a ~10-fold reduction in the  
433 number of contigs, as well as set an upper bound for the size of the sequenced EL10 genome  
434 assembly (628 Mb). However, this also was insufficient to achieve chromosome-level assembly.  
435 Further addition of Hi-C data, where intact nuclei are cross-linked *in vivo* and where the native  
436 genome organization is presumably preserved, provided the means to map chromosome level  
437 associations. The sequential application of at least four independent technologies (i.e., short- and  
438 long-read sequencing, physical / optical maps, Hi-C chromatin conformation capture, and genetic  
439 maps) seems to have overcome many limitations spanning low-complexity regions of a genome  
440 over previous technologies in creating contiguous *de novo* genome assemblies of moderate to  
441 large plant genomes.

442 A reduction in gene copy number in beet (relative to annotated protein genes generated for  
443 comparative purposes, e.g., MapMan4) was observed. No clear evidence of gene copy number  
444 amplification was seen among the EL10.1 predicted protein set. Clear reductions were observed  
445 for transcription factors in particular, also observed by Dohm et al. (2014). Exceptions to the  
446 transcription factor reduction observed in EL10.1 included the FAR1 class of transcription  
447 factors, which may be anciently-derived from Mutator-like transposons and coopted in  
448 Arabidopsis for red-light perception and signaling (Hosoda et al. 2002, Mason et al. 2005). The  
449 role for this class of sequences remains unknown in beets, and copy number variation was high  
450 for FAR1 between the five other angiosperms considered. Discounting the occasional exception  
451 to lower overall gene copy number in beets, it may be suggestive of a basal gene copy number in  
452 dicots where beet numbers (or Caryophyllids in general) approximate a baseline condition, and  
453 other dicots have increased their copy numbers, as opposed to beets missing copies.

454 Genome size estimates of the cultivated beets examined here were quite variable, ranging from  
455 633.0 to 875.5 MB per haploid genome. Genome size estimates of 21 wild *Beta vulgaris* spp.



456 *maritima* genotypes from Portugal ranged from 660.1 to 753.1 MB (Castro et al. 2013), thus  
457 variability in genome size is known to occur in the species. The range of estimates was 2.6 times  
458 higher in the cultivated beets relative to the wild types. This was also observed relative to the  
459 breeding system of the cultigens, where the range in genome size among the out-crossers was 2.7  
460 times lower than that of the inbreds (e.g., Table 13). Inbreeding *per se* may have effects on  
461 genome size in maize, including substantial loss of chromatin (Roessler et al. 2019). High  
462 variability in genome size between generations may be expected if copy-number variations were  
463 generated at each generation, as suggested by changes in genome size and read depth variation at  
464 specific loci. When during the life cycle such changes occur is not known, but presumably  
465 during a phase associated with DNA replication, and it is likely that transposable elements are at  
466 least partially involved (Whitney et al. 2010).

467 Variation in read-depth coverage may be useful for tracking genome size changes (Pucker  
468 2019). Areas of high variation are intriguing from a chromosome biology and evolution  
469 perspective, as well as their potential effect on phenotype and on the origin of novel variation. It  
470 is no surprise that many plant genomes are large because of their highly repetitive nature, and  
471 many classes of repetitive elements are known to vary across kingdoms, often with little in  
472 common other than size, the fact they are repetitive, and characteristic footprints (target site  
473 duplications, terminal repeats, etc.) (Bennetzen and Wang 2014). Speciation seems to favor  
474 whole-scale sequence replacement of repeat elements while retaining their size, however inter-  
475 specific amplified repeats seem to be present at low copy number in related genomes (Schmidt et  
476 al. 1991). Exactly how, and in particular when and what effects the efficiency, distribution, and  
477 specificity of divergent repeat amplification, is not as easy to investigate. Genome size reduction  
478 occurs rarely in plants, and improved read depth mapping approaches may be helpful in  
479 identifying additional examples and underlying mechanisms.

480 Two related, and two unrelated, germplasms contributed short-reads to the read depth  
481 differences observed, and are not necessarily representative breeding populations but rather have  
482 been crafted for genetic analyses. Beet is naturally a wind-pollinated out-crosser, which means  
483 that genetic diversity is partitioned within populations rather than between populations, as for  
484 inbreds. Each of the germplasms examined here, with the exception of C869\_25, is highly  
485 inbred, using one of three different breeding methods. Both C869\_UK and EL10 were derived  
486 from C869\_25 through single seed descent, for three and five generations, respectively. RefBeet

487 (aka KWS2320) was derived as a doubled haploid, and NK-388mm-O is a seed parent for  
488 hybrids inbred through conventional sib-mating (Taguchi 2014, Taguchi et al. 2019). The  
489 method used to generate the inbred seems not to relate to generation of read depth differences.  
490 Relatives of C869\_25 showed as much difference in copy number as did the unrelated  
491 germplasm. However, each germplasm had a set of events specific to their own lineage, and  
492 others that were shared among two, three, or all germplasms. For instance, NK-388mm-O was  
493 enriched in depth at EL10.1 Chromosome 1 positions 53,310,000 Mb to 53,325,000 Mb,  
494 KWS2320 depauperate at positions 40,540,000 to 44,615,000, and C869\_25 over represented  
495 from 22,735,000 to 22,7750,000. Responsible sequences underlying these regions have not yet  
496 been investigated, except where wide differences in chloroplast content, and less so  
497 mitochondria, were particularly rich in NK-388mm-O. We recognize the speculative nature of  
498 these interpretations, but they do generate testable hypotheses in a difficult to access arena of  
499 chromosome biology.

500 Exploration of synteny between species is accessible from a contiguous well-annotated  
501 genome sequence. For EL10.1, annotations were conservatively estimated from well curated  
502 plant gene resources, which likely improved confidence in assessing similarity between well  
503 known plant genes. Following the syntenic organization of such genes across phylogenetic  
504 groups showed that closely related species retained higher levels of synteny than more distantly  
505 related species, as expected. Also expected, was that recombination and schism of synteny  
506 blocks increased with increasing phylogenetic distance. Perhaps unexpected was differential  
507 synteny conservation by individual chromosomes. However, relatively few plant genomes are  
508 available that are highly contiguous, and this caveat limits interpreting results (for instance, the  
509 spinach genome is still under construction).

510

511

## Methods

512 **Plant material:** USDA-ARS germplasm release EL10 (PI 689015) was derived by single seed  
513 descent from C869 (PI 628755) by self-pollinating over six generations. C869 is a biennial sugar  
514 beet conditioned by the self-fertile ( $S^fS^f$ ) allele and is segregating for nuclear male sterility ( $Aa$ ),  
515 with resistance to several diseases (Lewellen 2004). The initial selfing occurred from one self-  
516 fertile C869 CMS plant (EL-A013483) in 2002. Seed was field grown at the Bean and Beet Farm

517 (Saginaw, MI) in 2005, roots were harvested, potted into fiber pots (5 L, Stock #  
518 ITMLFNP08090RBRD040TW, BFG Supply, Burton, OH), vernalized for 16 weeks, and grown  
519 in the greenhouse until flowering. Flowers were inspected for visible pollen, and when present, a  
520 #16 white grocery bag (Duro Bag, Novolex, Hartsville, SC) was placed over the bolting stem to  
521 effect self-pollination. Seed harvested from a single plant (EL-A018880) was considered the S1  
522 generation, and subsequent generations were derived by single seed descent using field grown  
523 mother roots and selfing with the same methods. The S2 generation (EL-A022144) was obtained  
524 in 2007, and the S3 (EL-A025943) in 2010. Nine individuals of this population were genotyped  
525 with 69 SESVanderhave proprietary SNP markers evenly spaced across the beet linkage map,  
526 and a single homozygous individual (#17) of this population was sequenced for a preliminary  
527 assembly (named C869\_UK here, McGrath et al. 2013). A sibling of this line (EL-A026195)  
528 with good field performance in the 2011 Michigan field (Saginaw Valley Research and  
529 Extension Center, SVREC, Richville, MI) was selfed in the same manner to yield the S4, while  
530 S5 (EL-A13-03870) and S6 generations were produced solely under greenhouse conditions in  
531 2013 and 2015, respectively. Sixteen S6 individuals were genotyped with 24 SSR markers  
532 (McGrath et al. 2007), and six individuals (EL-A15-01096, EL-A15-01098, EL-A15-01099, EL-  
533 A15-01101, EL-A15-01102, and EL-A15-01103) were chosen as sequencing candidates based  
534 on marker homozygosity and similar growth habit and appearance, and pooled for long-read  
535 sequencing. One of these (EL-A15-01101) provided the sole tissue source for Illumina  
536 sequencing and nuclear DNA content estimation, and seed was named and released as EL10.  
537 Seed of EL10 was increased and deposited in the National Plant Germplasm System repository  
538 as a genetic stock (PI 689015).

539 Additional taxa were used, depending on the availability of materials. For the assessment of  
540 genome size, cytometric estimates were obtained from progeny of EL-A15-01101 whose genome  
541 was assembled here, advanced progeny of table beet W357B (a self-fertile parental line  
542 graciously provide by Dr. Irwin Goldman) which was inbred by single seed descent for five  
543 generations (accession EL-A1400766), an East Lansing open-pollinated self-sterile sugar beet  
544 breeding population (termed "5B"), and an open-pollinated USDA-ARS release used for a  
545 disease nursery check entry (F1042, PI 674103).

546 **Genome sequencing, assembly, and finishing:** High molecular weight DNA for PacBio  
547 sequencing isolated nuclei using the HMW preparation protocols suitable for BAC library

548 construction by Amplicon Express (Pullman, WA). PacBio RSII sequencing was performed at  
549 the Los Alamos National Laboratory (Los Alamos, NM), in 86 single-molecule, real-time cells  
550 using P6-C4 chemistry. PacBio reads greater than 6 kb were assembled with the Falcon  
551 Assembler (version 0.2.2), resulting in 938 primary contigs. Optical mapping was performed  
552 using the BioNano Irys sequential hybrid protocol with enzymes *BssSI* and *BspQI*. For the  
553 EL10.1 assembly, scaffolding was accomplished using Proximity Guided Assembly (PGA) and  
554 Hi-C reads by Phase Genomics (Seattle, WA). Resulting scaffolds were polished and gap-filled  
555 using PBJelly, Arrow, and Pilon, following Bickhart et al. (2017). Briefly, PBJelly from PBSuite  
556 v15.8.24 was run using the Protocol.xml (<https://gembox.cbcb.umd.edu/shared/Protocol.xml>)  
557 with default parameters and minimum gap size set to 3 as: Jelly.py setup Protocol.xml --  
558 minGap=3, Jelly.py mapping Protocol.xml, Jelly.py support Protocol.xml, Jelly.py extraction  
559 Protocol.xml, Jelly.py assembly Protocol.xml, and finally Jelly.py output Protocol.xml. Pilon  
560 v1.13 was run using --fix local bases and the is pipeline at: <https://github.com/skoren/PilonGrid>.  
561 Arrow v2.0.0 was run using the pipeline available at: <https://github.com/skoren/ArrowGrid>. And,  
562 Pilon v1.21 was run using --fix indels using the pipeline at: <https://github.com/skoren/PilonGrid>.  
563 For the EL10.2 assembly, 462 million Hi-C read pairs were input into the SBJ\_80X\_BN  
564 assembly (Table 2) and assembled via Chicago and Dovetail Hi-C technologies using the HiRise  
565 algorithm as described (Meyer and Kircher 2010, Putman et al. 2015). Bioinformatic  
566 manipulations during sequential assembly steps were performed by the respective organizations,  
567 and the ‘best’ assembly was then used as input for the next assembly step. Assembly metrics  
568 were assessed using `assemblathon_stats.pl` with default parameters  
569 ([github.com/KorfLab/Assemblathon](https://github.com/KorfLab/Assemblathon)) (Earl et al. 2011).

570 **Whole-genome alignment:** Whole-genome alignment of the EL10.1 assembly (as reference)  
571 and the RefBeet-1.2 assembly (as query) was conducted using modules from MUMmer  
572 v.4.0.0beta2. Initial alignments were created with the `nucmer` module, with options `--mum --`  
573 `minmatch 30` (uses only anchor matches that are unique in both the reference and the query, and  
574 sets the minimum length of a single exact match to 30 bp). The resulting delta alignment was  
575 filtered using the `delta-filter` module with options `-1 -i 70 -l 5000` (to use only 1-to-1 alignments,  
576 with a minimum 70% sequence identity, and minimum alignment length of 5,000 bp). Summary  
577 reports were created using `dnadiff`, and plots were created from the filtered delta file using

578 mummerplot with options --png --fat -r (with output image as png, and using layout sequences  
579 using fattest alignment only).

580 **Annotation:** The EL10.1 assembly was annotated using the MAKER pipeline (Holt and Yandell  
581 2011). The EL10.2 assembly has not been annotated. A custom repeat library for EL10 was  
582 created and used for repeat masking (Campbell et al. 2014). Protein and transcript evidence were  
583 used to aid gene model prediction. Protein evidence was obtained from the following species or  
584 databases: *Arabidopsis thaliana* proteins from Araport11 (Cheng et al. 2017), *Solanum*  
585 *lycopersicum* proteins from IPTG 2.4 (Fernandez-Pozo et al. 2015), *Populus trichocarpa*  
586 proteins from Phytozome genome v3.0 (Tuskan et al. 2006), and curated plant proteins from  
587 UniProt release 2017\_03 (The UniProt Consortium 2017). Transcript evidence was derived from  
588 25 RNA-seq read sets (BioProject PRJNA450098, Illumina 2500, 150 bp paired-end) using  
589 StringTie v1.3.3b (Pertea et al. 2015) and TransDecoder v5.0.1 (Haas & Papanicolaou et al.,  
590 manuscript in prep. <http://transdecoder.github.io>).

591 Gene prediction programs AUGUSTUS (Stanke and Waack 2003) and SNAP (Korf 2004) were  
592 trained using the transcript sequences generated by StringTie (above), and both AUGUSTUS and  
593 SNAP were used to predicted gene models within the MAKER pipeline (Holt and Yandell  
594 2011). When AUGUSTUS and SNAP predicted genes at the same locus, MAKER chose the  
595 gene model that was the most concordant with the transcript and protein evidence, and that  
596 model was retained at that locus. HMMER v 3.1 (Finn et al. 2011) was used to determine the  
597 presence of Pfam-A protein domains in the initial predicted protein sequences. Gene models  
598 supported either by protein or transcript evidence or by the presence of a Pfam domain were  
599 collected as high-quality gene models for the final genome annotation. Both transcript and  
600 protein sequences were searched against the SwissProt and UniRef databases using BLAST  
601 (Altschul et al. 1990). HMMER v3.1 (Finn et al. 2011) identified PfamA domains within  
602 predicted protein sequences. Signal peptide and transmembrane domains were predicted using  
603 SignalP v4.1 (Petersen et al. 2011) and TMHMM v2.0 (Krogh et al. 2001), respectively.  
604 Searches and predicted results were parsed and combined in the final functional annotation.

605 The online sequence functional classification and annotation tool Mercator4 ver. 2.0 (Schwacke  
606 et al. 2019) was supplied with the EL10.1 MAKER predicted protein fasta file using default  
607 settings. Four gene models were excluded from analysis due to their short length (<5 amino

608 acids) (e.g. EL10Ac2g04429.1, EL10Ac8g20093.1, EL10Ac1g00658.1, EL10Ac7g16947.1).  
609 Comparisons were made with Mercator4-supplied representatives of the Tracheophyta (i.e.  
610 *Oryza sativa*, *Brachypodium distachyon*, *Arabidopsis thaliana*, *Solanum lycopersicum*, and  
611 *Manihot esculenta*).

612 **LTR annotation:** *De novo* identification of intact LTR retrotransposons were performed using  
613 LTR\_Retrieve v1.6 with default parameters (Ou and Jiang 2018). The insertion time of each  
614 intact LTR-RT is estimated by LTR\_retriever based on  $T = K/2\mu$  where K is the divergence  
615 between an LTR pair and  $\mu$  is the mutation rate of  $1.3 \times 10^{-8}$  per bp per year. Whole-genome  
616 LTR sequence annotations were achieved using the non-redundant LTR library generated by  
617 LTR\_Retrieve and RepeatMasker v4.0.0 ([www.repeatmasker.org](http://www.repeatmasker.org)).

618 **LAI estimation:** The assembly continuity of repeat space is accessed using the LTR Assembly  
619 Index (LAI) deployed in the LTR\_retriever package (v1.6) (Ou and Jiang 2018). LAI was  
620 calculated based on either 3 Mb sliding windows or the whole assembly using  $raw\_LAI = (Intact$   
621  $LTR-RT\ length * 100) / Total\ LTR-RT\ length$ . For the sliding window estimation, a step of 300  
622 Kb was used (-step 300000 -window 3000000). The estimation of LAI was adjusted using the  
623 mean identity of LTR sequences in the genome based on all-versus-all BLAST.

624 **Tandem Repeats:** Tandem Repeats Finder Program Version 4.09 was used to characterized  
625 tandemly duplicated sequences. using the default Alignment Parameters (e.g. match = 2,  
626 mismatch = 7, indels = 7, PM=80, PI=10, Minimum alignment score = 50, Maximum period size  
627 = 500) (Benson 1999).

628 **Self-synteny:** CoGe SynMap (Lyons et al. 2008) was used, inputting *Beta vulgaris* (vEL10\_1.0,  
629 id37197) and EL10.1 MAKER annotation gff files. Coding sequences were compared using  
630 LAST (Kielbasa et al. 2011) and DAGChainer (Haas et al. 2004) (with input settings Maximum  
631 distance between two matches = 20 genes, Minimum number of aligned genes = 5). Kn/Ks ratios  
632 (Yang 2007) were calculated using default parameters on CoGe  
633 ([genomevolution.org/wiki/index.php/SynMap](http://genomevolution.org/wiki/index.php/SynMap)).

634 **Genome size variation:** Four *Beta vulgaris* populations were evaluated for nuclear DNA  
635 content as described (Arumagathan and Earle 1991). Briefly, young and healthy true leaf tissues  
636 from greenhouse grown seedlings were placed in between moist paper towels in zip-lock bags  
637 and shipped to the Flow Cytometry Lab at Benaroya Research Institute at Virginia Mason

638 (Seattle, WA) for next day delivery. 50 mg of leaf tissue from each sample was finely chopped  
639 using a razor edge to release intact nuclei for flow cytometric analysis. Chicken erythrocyte  
640 nuclei (2.50 pg/2C) were used as an internal standard. A value of 978 Mb per pg was used for  
641 genome size conversion (Doležel et al. 2003). Statistical analyses were performed with JMP Pro  
642 version 14 (SAS, Cary, NC).

643 **Read count mapping:** Reads from five Illumina paired-end sequencing datasets were trimmed  
644 and subsampled to produce sets of 25 GB for normalized mapping to the EL10.1 assembly.  
645 These were the single sequenced EL10 plant, a single plant two generations less inbred than  
646 EL10 (i.e., C869\_UK), a pool of 25 individual from the parental population from which EL10  
647 was derived (C869\_25), the doubled haploid from which RefBeet was generated (KWS2320),  
648 and a single plant of a Japanese O-type breeding line (NK-388mm-O) (each accessible at NCBI  
649 BioProject PRJNA563463). Four samples of KWS2320 genomic reads (SRR869628,  
650 SRR869631, SRR869632, and SRR869633) were obtained from the NCBI SRA and pooled prior  
651 to filtering. FASTQ reads from the 5 mapping samples were filtered for a minimum FASTQ  
652 quality of 6 and minimum length of 80 bp after trimming. The reads that passed the filter were  
653 randomly subsampled to obtain 25 GB of reads per sample. Each pool of 25 GB was  
654 independently mapped to the EL10 assembly using BMap v. 36.67 (Bushnell 2014). Read  
655 mapping was done with default parameters and kmer length = 13 with the addition of 'local=t' to  
656 allow soft-clipping the ends of alignments and 'ambiguous=random' to randomly assign reads  
657 with multiple best matches among all best sites, to facilitate mapping of repetitive sequences  
658 evenly across the genome. For plotting read depth, 5 kb bins were created across each  
659 chromosome and the read coverage per base pair was calculated for each bin. The 'basecov' and  
660 'covstats' outputs of BMap were used to determine read depths and their standard deviations.

661 **Multispecies Synteny:** The analysis of synteny was accomplished by plotting collinear blocks  
662 relative to beet chromosomes. Collinear blocks were defined using the program MCScanX using  
663 default recommendations (Wang et al. 2012). Protein sets for *A. thaliana*, *V. vinifera*, *S.*  
664 *oleraceae*, and *A. hypocondriacus* were downloaded from phytozome (<https://phytozome.jgi.doe.gov/pz/portal.html>) with their corresponding gff files. Quinoa data were downloaded from  
665 chenopodiumdb ([www.cbrc.kaust.edu.sa/chenopodiumdb/](http://www.cbrc.kaust.edu.sa/chenopodiumdb/)) and the *B. vulgaris* proteins and gff  
666 files were developed for this report.

668 **Accession Numbers:** Sequence data from this article can be found in the EMBL/GenBank data  
669 libraries. The EL10 sugar beet whole genome project has been deposited in NCBI under the  
670 accession PCNB00000000. EL10.1 is version PCNB01000000. Associated NCBI database  
671 pointers are BioSample SAMN07736104, BioProject PRJNA413079; Assembly  
672 GCA\_002917755.1, and WGS Project PCNB01. All raw reads used in EL10 genome assemblies  
673 are deposited in the short-read archive (SRA): Illumina reads SRR6305245; PacBio Reads  
674 SRR6301225; and Hi-C Library reads SRR10011257 (Phase Genomics) and SRR12507442 &  
675 SRR12507443 (Dovetail Genomics). BioNano Maps are located at SAMN08939661 (*BspQ1*)  
676 and SAMN08939667 (*BssS1*). Read mapping accessions are deposited under BioProject  
677 PRJNA563463, and BioSamples SAMN12674955 (C869\_UK), SAMN12674956 (C869\_25),  
678 SAMN12674957 (NK-388mm-O). The EL10 genome assemblies and annotations can be viewed  
679 and downloaded via the CoGe Genome Browser available at [genomevolution.org/coge/](http://genomevolution.org/coge/), both  
680 EL10.1 (Genome ID = 54615) and EL10.2 (Genome ID = 57232), and Phytozome only for  
681 EL10.1 ([phytozome-next.jgi.doe.gov/info/Bvulgaris\\_EL10\\_1\\_0](http://phytozome-next.jgi.doe.gov/info/Bvulgaris_EL10_1_0)).

682 Genome browsing and file resources including transcript assemblies are available at  
683 [sugarbeets.msu.edu](http://sugarbeets.msu.edu). Transcript assemblies were constructed from root development and leaf  
684 RNA-seq reads derived from C869 (the EL10 progenitor) from 3 to 10 weeks post emergence  
685 (Trebbi and McGrath 2009) [3-week-old root (SRR10039097), 4-week-old root (SRR10039086),  
686 5-week-old root (SRR10039081), 6-week-old root (SRR10039080), 7-week-old root  
687 (SRR10039079), 10-week-old root (SRR10039098), and mature leaf (SRR10037935)]. Also  
688 included were RNA-seq sets of 96 hr germinated seedlings from other germplasm germinated  
689 under aqueous stress conditions (McGrath et al. 2000), including 150 mM NaCl, 0.3% hydrogen  
690 peroxide, and biologically extreme temperatures (10 and 41 °C) (SRR10039075, SRR10039076,  
691 SRR10039077, SRR10039078, SRR10039082, SRR10039083, SRR10039084, SRR10039085,  
692 SRR10039087, SRR10039088, SRR10039089, SRR10039090, SRR10039091, SRR10039092,  
693 SRR10039093, SRR10039094, SRR10039095, and SRR10039096). The transcript assemblies  
694 are located at <http://sugarbeets.msu.edu/data/EL10.1/>.

695

696 **Supplemental Data files:** To be selected from the contributed, at the discretion of the editors as  
697 appropriate.



698

699 **Acknowledgements:** We thank Safa Alzohairy for isolating RNA from germinating sugar beet  
700 seedlings under various germination regimes. We also thank K. Arumuganathan, Director of the  
701 Flow Cytometry Lab of the Benaroya Research Institute at Virginia Mason, Seattle, WA for  
702 contracting the genome size estimates, and the staff at Dovetail Genomics (Santa Cruz, CA) for  
703 their assistance with the EL10.2 assembly. JMM: Funding provided by USDA-ARS CRIS 3635-  
704 21000-011-00D and the Beet Sugar Development Foundation, Denver, CO, USA. SK and AP  
705 were supported by the Intramural Research Program of the National Human Genome Research  
706 Institute, National Institutes of Health. Authors assert no conflicts of interest.

707

708 **Author Contributions:**

709 JMM, BT, EM-G, KD: Conceived and organized the work and wrote the manuscript; AF, PG,  
710 SO: Characterized EL10.1 assembly sequence organization; KD, HD, SJ: Created PacBio  
711 resources; JL, AH: Created BioNano resources; IL, SS, SK, AP: Conducted Hi-C assembly and  
712 finishing of EL10.1; AD, GW, SB, PS, KT: Applied proprietary genetic markers and materials to  
713 assess integrity of the EL10 assemblies; JW, TL, JP, KC: Provided MAKER gene annotations  
714 for EL10.1; AY, DF: Created RNA-seq transcriptome assemblies used in the EL10.1 annotation.

715

716 **Author emails:**

717 Mitch McGrath <mitchmcg@msu.edu>

718 Andrew Funk <funkand3@msu.edu>

719 Paul Galewski <galewski@msu.edu>

720 Shujun Ou <oushujun@iastate.edu>

721 Belinda Townsend <townsendbj810@gmail.com>

722 Karen Walston Davenport <kwdavenport@lanl.gov>

723 Hajnalka Daligault <hajkis@lanl.gov>

724 Shannon Lyn Johnson <shannonj@lanl.gov>

725 Joyce Lee <jlee@bionanogenomics.com>  
726 Alex Hastie <ahastie@bionanogenomics.com>  
727 Aude Darracq <Aude.Darracq@sesvanderhave.com>  
728 Glenda Willems <Glenda.Willems@sesvanderhave.com>  
729 Steve Barnes <barnes.sr@gmail.com>  
730 Ivan Liachko <ivan@phasegenomics.com>  
731 Shawn Sullivan <shawn@phasegenomics.com>  
732 Sergey Koren <sergey.koren@nih.gov>  
733 Adam Phillippy <adam.phillippy@nih.gov>  
734 Jie Wang <wangjie6@msu.edu>  
735 Tiffany Liu <liutiff1@msu.edu>  
736 Jane Pulman <jane.pulman@googlemail.com>  
737 Kevin Childs <kchilds@msu.edu>  
738 Anastasia Yocum <anastasia.yocum@a2idea.com>  
739 Damian Fermin <damian.fermin@a2idea.com>  
740 Effie Mutasa-Gottgens <effie@ebi.ac.uk>  
741 Piergiorgio Stevanato <stevanato@unipd.it>  
742 Kazunori Taguchi <ktaguchi@affrc.go.jp>  
743 Kevin Dorn <Kevin.Dorn@usda.gov>  
744

745 **References:**

- 746 Abe, J., Guan, G-P., and Shimamoto, Y. (1993) Linkage maps for nine isozyme and four marker  
747 loci in sugarbeet (*Beta vulgaris* L.). *Euphytica* 66:117-126.
- 748 Altschul SF, Gish W, Miller W, Myers EW, Lipman DJ (1990) Basic local alignment search  
749 tool. *Journal of Molecular Biology* 215:403-410
- 750 Andrello, M., K. Henry, P. Devaux, B. Desprez, and S. Manel. 2016. Taxonomic, spatial and  
751 adaptive genetic variation of *Beta* section *Beta*. *Theor. Appl. Genet.* 129:257–271.
- 752 Andrello, M., K. Henry, P. Devaux, D. Verdelet, D., B. Desprez, and S. Manel. 2017. Insights  
753 into the genetic relationships among plants of *Beta* section *Beta* using SNP markers. *Theor.*  
754 *Appl. Genet.* 130:1857-1866.
- 755 Arumuganathan, K., and E.D. Earle. 1991. Nuclear DNA content of some important plant  
756 species. *Plant Mol. Biol. Rep.* 9:208-218.
- 757 Bennetzen JL, Wang H (2014) The contributions of transposable elements to the structure,  
758 function, and evolution of plant genomes. *Annual Review of Plant Biology* 65:505–530.
- 759 Benson, G. (1999) Tandem repeats finder: a program to analyze DNA sequences. *Nucleic Acid*  
760 *Research* 27:573-580.
- 761 Biancardi, E., L.W. Panella, and R.T. Lewellen. 2012. *Beta maritima*: The origin of beets.  
762 Springer, New York.
- 763 Bickhart DM, Rosen BD, Koren S, Sayre BL, Hastie AR, Chan S, Lee J, Lam ET, Liachko I,  
764 Sullivan ST, Burton JN, Huson HJ, Nystrom JC, Kelley CM, Hutchison JL, Zhou Y, Sun J,  
765 Crisà A, Ponce de León FA, Schwartz JC, Hammond JA, Waldbieser GC, Schroeder SG, Liu  
766 GE, Dunham MJ, Shendure J, Sonstegard TS, Phillippy AM, Van Tassell CP, Smith TPL  
767 (2017) Single-molecule sequencing and chromatin conformation capture enable de novo  
768 reference assembly of the domestic goat genome. *Nature Genetics* 49: 643-650.
- 769 Bushnell, B. (2014). BBMap: A fast, accurate, splice-aware aligner. - Report Number: LBNL-  
770 7065E.
- 771 Butterfass, T. 1964. Die chloroplastenzahlen in verschiedenartigen zel- len trisomer zuckerruben  
772 (*Beta vulgaris* L.). *Z. Bot.* 52:46–77.

- 773 Campbell, M.S., Law, M., Holt, C., Stein, J.C., Moghe, G.D., Hufnagel, D.E., Lei, J.,  
774 Achawanantakun, R., Jiao, D., Lawrence, C.J., **et al.** (2014). MAKER-P: A tool kit for the  
775 rapid creation, management, and quality control of plant genome annotations. *Plant Physiol.*  
776 164: 513–524.
- 777 Castro S, Romeiras MM, Castro M, Duarte MC, Loureiro J. (2013) Hidden diversity in wild *Beta*  
778 taxa from Portugal: Insights from genome size and ploidy level estimations using flow  
779 cytometry. *Plant Science* 207: 72–78.
- 780 Cheng, C.-Y., Krishnakumar, V., Chan, A.P., Thibaud-Nissen, F., Schobel, S., and Town, C.D.  
781 (2017). Araport11: a complete reannotation of the *Arabidopsis thaliana* reference genome.  
782 *Plant J.* 89: 789–804.
- 783 Dechyeva D, Schmidt T. (2007) Molecular organization of terminal repetitive DNA in *Beta*  
784 species. *Chromosome Res.* 214:881–97.
- 785 del Rio AR, Minoche AE, Zwickl NF, Friedrich A, Liedtke S, Schmidt T, Himmelbauer H,  
786 Dohm JC (2019) Genomes of the wild beets *Beta patula* and *Beta vulgaris* ssp. *maritima*. *The*  
787 *Plant Journal*: DOI:10.1111/tpj.14413.
- 788 Dohm JC, Lange C, Holtgräwe D, Rosleff Sørensen T, Borchardt D, Schulz B, Lehrach H,  
789 Weisshaar B, Himmelbauer H. (2012) Palaeohexaploid ancestry for Caryophyllales inferred  
790 from extensive gene-based physical and genetic mapping of the sugar beet genome (*Beta*  
791 *vulgaris*) *Plant J.* 70:528-540.
- 792 Dohm, J.C., C. Lange, R. Reinhardt, and H. Himmelbauer. 2009. Haplotype divergence in *Beta*  
793 *vulgaris* and microsynteny with sequenced plant genomes. *Plant Journal* 57:14-26.
- 794 Dohm, J.C., Minoche, A.E., Holtgräwe, D., Capella-Gutiérrez, S., Zakrzewski, F., Tafer, H.,  
795 Rupp, O., Sørensen, T.R., Stracke, R., Reinhardt, R., A. Goesmann, B. Schulz, P.F. Stadler, T.  
796 Schmidt, T. Gabaldón, H. Lehrach, B. Weisshaar, and H. Himmelbauer (2014). The genome of  
797 the recently domesticated crop plant sugar beet (*Beta vulgaris*). *Nature* 505, 546–549.
- 798 Doležel, J., Bartoš, J., Voglmayr, H. and Greilhuber, J. (2003), Letter to the editor. *Cytometry*,  
799 51A: 127–128. doi:10.1002/cyto.a.10013
- 800 Earl D, Bradnam K, St John J, Darling A, Lin D, Fass J, Yu HO, Buffalo V, Zerbino DR,  
801 Diekhans M, Nguyen N, Ariyaratne PN, Sung WK, Ning Z, Haimel M, Simpson JT, Fonseca

- 802 NA, Birol İ, Docking TR, Ho IY, Rokhsar DS, Chikhi R, Lavenier D, Chapuis G, Naquin D,  
803 Maillet N, Schatz MC, Kelley DR, Phillippy AM, Koren S, Yang SP, Wu W, Chou WC,  
804 Srivastava A, Shaw TI, Ruby JG, Skewes-Cox P, Betegon M, Dimon MT, Solovyev V,  
805 Seledtsov I, Kosarev P, Vorobyev D, Ramirez-Gonzalez R, Leggett R, MacLean D, Xia F, Luo  
806 R, Li Z, Xie Y, Liu B, Gnerre S, MacCallum I, Przybylski D, Ribeiro FJ, Yin S, Sharpe T, Hall  
807 G, Kersey PJ, Durbin R, Jackman SD, Chapman JA, Huang X, DeRisi JL, Caccamo M, Li Y,  
808 Jaffe DB, Green RE, Haussler D, Korf I, Paten B. (2011) Assemblathon 1: a competitive  
809 assessment of de novo short read assembly methods. *Genome Res.* 21:2224-2241. doi:  
810 10.1101/gr.126599.111.
- 811 Fernandez-Pozo, N., Menda, N., Edwards, J.D., Saha, S., Tecle, I.Y., Strickler, S.R., Bombarely,  
812 A., Fisher-York, T., Pujar, A., Foerster, H., **et al.** (2015). The Sol Genomics Network (SGN)—  
813 from genotype to phenotype to breeding. *Nucleic Acids Res.* 43, D1036–D1041.
- 814 Finn, R.D., Clements, J., and Eddy, S.R. (2011). HMMER web server: interactive sequence  
815 similarity searching. *Nucleic Acids Res.* 39, W29–W37.
- 816 Flavell R.B., M.D. Bennet, and J.B. Smith. 1974. Genome size and the proportion of repeated  
817 nucleotide sequence DNA in plants. *Biochem. Genet.* 12:257-269.
- 818 Funk, A., Galewski, P., McGrath, J. M. (2018) Nucleotide-binding resistance gene signatures in  
819 sugar beet, insights from a new reference genome. *The Plant Journal* 95:659-671
- 820 Galon, J., and D.T. Zallen. 1998. The role of the Vilmorin Company in the promotion and  
821 diffusion of the experimental science of heredity in France, 1840–1920. *J. Hist. Biol.* 31:241–  
822 262.
- 823 Galewski, P., McGrath, J.M. 2020. Genetic diversity among cultivated beets (*Beta vulgaris*)  
824 assessed via population-based whole genome sequences. *BMC Genomics* 21:189.  
825 <https://doi.org/10.1186/s12864-020-6451-1>
- 826 Goldman, I.L., and D. Austin. 2000. Linkage among the *R*, *Y* and *BI* loci in table beet. *Theor.*  
827 *Appl. Genet.* 100:337–343.
- 828 Haas BJ, Delcher AL, Wortman JR, Salzberg SL (2004) DAGchainer: a tool for mining  
829 segmental genome duplications and synteny. *Bioinformatics* 20: 3643–3646

- 830 Halldén, C., D. Ahrén, A. Hjerdin, T. Säll, and N.O. Nilsson. 1998. No conserved homoeologous  
831 regions found in the sugar beet genome. *J. Sugar Beet Res.* 35:1-13.
- 832 Hatlestad, G.J., N.A. Akhavan, R.M. Sunnadaniya, L. Elam, S. Cargyle, A. Hembd, A.  
833 Gonzalez, J.M. McGrath, and A.M. Lloyd. 2014. The beet *Y* locus is a co-opted anthocyanin  
834 MYB that regulates betalain pathway structural genes. *Nature Genetics* 47:92–96.
- 835 Hatlestad, G.J., R.M. Sunnadaniya, N.A. Akhavan, A. Gonzalez, I.L. Goldman, J.M. McGrath,  
836 and A.M. Lloyd. 2012. The beet *R* locus encodes a new cytochrome P450 required for red  
837 betalain production. *Nature Genetics* 44:816–820.
- 838 Holt, C., and Yandell, M. (2011). MAKER2: An annotation pipeline and genome-database  
839 management tool for second-generation genome projects. *BMC Bioinformatics* 12, 491.
- 840 Hosoda K, Imamura A, Katoh E, Hatta T, Tachiki M, Yamada H, Mizuno T and Yamazaki T  
841 (2002) Molecular structure of the GARP family of plant Myb-related DNA binding motifs of  
842 the Arabidopsis response regulators. *The Plant Cell* 14:2015–2029
- 843 Jarvis DE, Ho YS, Lightfoot DJ, Schmöckel SM, Li B, Borm TJA, et al. 2017. The genome of  
844 *Chenopodium quinoa*. *Nature* 542: 307-312
- 845 Jung H, Winefield C, Bombarely A, Prentis P, Waterhouse P. (2019) Tools and strategies for  
846 long-read sequencing and *de novo* assembly of plant genomes. *Trends Plant Sci.* 24:700-724.
- 847 Keller, W. 1936. Inheritance of some major color types in beets. *J. Agric. Res.* 52:27-38.
- 848 Kielbasa, S.M., Wan, R., Sato, K., Horton, P., and Frith, M.C. (2011). Adaptive seeds tame  
849 genomic sequence comparison. *Genome Research* 21:487–493.
- 850 Korf, I. (2004). Gene finding in novel genomes. *BMC Bioinformatics* 5, 59.
- 851 Kowar T, Zakrzewski F, Macas J, Koblížková A, Viehoveer P, Weisshaar B, Schmidt T (2016)  
852 Repeat composition of CenH3-chromatin and H3K9me2-marked heterochromatin in sugar beet  
853 (*Beta vulgaris*) *BMC Plant Biology* (2016) 16:120
- 854 Krogh, A., Larsson, B., von Heijne, G., and Sonnhammer, E.L.L. (2001) Predicting  
855 transmembrane protein topology with a hidden Markov model: application to complete  
856 genomes11 Edited by F. Cohen. *J. Mol. Biol.* 305, 567–580.
- 857 Lewellen, R.T. (2004) Registration of C869 and C869CMS. *Crop Sci.* 44:357.

- 858 Lightfoot DJ, Jarvis DE, Ramaraj T, Lee R, Jellen EN and Maughan PJ (2017) Single-molecule  
859 sequencing and Hi-C-based proximity-guided assembly of amaranth (*Amaranthus*  
860 *hypochondriacus*) chromosomes provide insights into genome evolution. BMC Biology (2017)  
861 15:74
- 862 Lyons, E., Pedersen, B., Kane, J., Alam, M., Ming, R., Tang, H., Wang, X., Bowers, J., Paterson,  
863 A., and Lisch, D. (2008) Finding and comparing syntenic regions among Arabidopsis and the  
864 outgroups papaya, poplar and grape: CoGe with rosids. Plant Phys. 148:1772–1781.
- 865 Mason MG, Mathews DE, Argyros DA Maxwell BB, Kieber JJ, Alonso JM, Ecker JR, and  
866 Schaller GE. (2005) Multiple Type-B response regulators mediate cytokinin signal  
867 transduction in *Arabidopsis*. The Plant Cell 17:3007–3018
- 868 McGrath JM, Drou N, Waite D, Swarbreck D, Mutasa-Gottgens E, Barnes S, Townsend B.  
869 (2013) The 'C869' Sugar Beet Genome: A Draft Assembly.  
870 <https://pag.confex.com/pag/xxi/webprogram/Paper5768.html>. Accessed 8/29/2020.
- 871 McGrath, J. M., Koppin, T. K. and Duckert, T. M. (2005) Breeding for genetics: Development of  
872 Recombinant Inbred Lines (RILs) for gene discovery and deployment. Proceedings of the  
873 American Society of Sugar Beet Technologists: 124-132. ([www.bsdf-assbt.org/wp-](http://www.bsdf-assbt.org/wp-content/uploads/2017/04/PASSBTAgp124to132BreedingforGeneticsDevelopmentofRecombinantInbredLinesforGeneDiscoveryandDeployment.pdf)  
874 [content/uploads/2017/04/PASSBTAgp124to132BreedingforGeneticsDevelopmentofRecombinantInbredLinesforGeneDiscoveryandDeployment.pdf](http://www.bsdf-assbt.org/wp-content/uploads/2017/04/PASSBTAgp124to132BreedingforGeneticsDevelopmentofRecombinantInbredLinesforGeneDiscoveryandDeployment.pdf); accessed June 16, 2019)
- 875
- 876 McGrath, J. M., Trebbi, D., Fenwick, A. Panella, L., Schulz, B., Laurent, V., Barnes, S. and  
877 Murray, S. C. (2007) An open-source first-generation molecular genetic map from a sugarbeet  
878 x table beet cross and its extension to physical mapping. Crop Science 47:S-27-S-44.
- 879 McGrath, J.M., and B.J. Townsend. (2015) Sugar beet, energy beet, and industrial beet. p. 81-99.  
880 In: V.M.V. Cruz and D.A. Dierig (eds.), Handbook of Plant Breeding. Volume 9. Industrial  
881 Crops: Breeding for Bioenergy and Bioproducts. Springer, New York.
- 882 McGrath, J.M., and Panella, L. (2019) Sugar Beet Breeding. Plant Breeding Reviews 42:167-  
883 218.
- 884 McGrath, J.M., Derrico, C.A., Morales, M., Copeland, L.O., Christenson, D.R. (2000)  
885 Germination of sugar beet (*Beta vulgaris* L.) seed submerged in hydrogen peroxide and water

886 as a means to discriminate cultivar and seedlot vigor. *Seed Science and Technology*. 28:607-  
887 620.

888 Melters DP, Bradnam KR, Young HA, Telis N, May MR, Ruby JG, Sebra R, Peluso P, Eid J,  
889 Rank D, Garcia JF, DeRisi JL, Smith T, Tobias C, Ross-Ibarra J, Korf I, and Chan SWL (2013)  
890 Comparative analysis of tandem repeats from hundreds of species reveals unique insights into  
891 centromere evolution. *Genome Biology* 2013 14:R10.

892 Meyer M, Kircher M. 2010. Illumina Sequencing Library Preparation for Highly Multiplexed  
893 Target Capture and Sequencing. *Cold Spring Harbor Protocol* doi:10.1101/pdb.prot5448.

894 Ou S, and Jiang N. 2018. LTR\_retriever: a highly accurate and sensitive program for  
895 identification of long terminal-repeat retrotransposons. *Plant Physiology* 176:1410–1422.

896 Paesold, S., D. Borchart, T. Schmidt, D. Dechyeva. 2012. A sugar beet (*Beta vulgaris* L.)  
897 reference FISH karyotype for chromosome and chromosome-arm identification, integration of  
898 genetic linkage groups and analysis of major repeat family distribution. *Plant J.* 72:600-611.

899 Panella, L., L.G. Campbell, I.A. Eujayl, R.T. Lewellen, and J.M. McGrath. 2015. USDA-ARS  
900 sugar beet releases and breeding over the past 20 years. *J. Sugar Beet Research* 52:22-67.

901 Panella, L., R.T. Lewellen, and L.E. Hanson. 2008. Breeding for multiple disease resistance in  
902 sugar beet: Registration of FC220 and FC221. *J. Plant Registrations* 2:146–155.

903 Pertea, M., Pertea, G.M., Antonescu, C.M., Chang, T.-C., Mendell, J.T., and Salzberg, S.L. 2015.  
904 StringTie enables improved reconstruction of a transcriptome from RNA-seq reads. *Nat.*  
905 *Biotechnol.* 33, 290–295.

906 Petersen, T.N., Brunak, S., von Heijne, G., and Nielsen, H. 2011. SignalP 4.0: discriminating  
907 signal peptides from transmembrane regions. *Nat. Methods* 8, 785–786.

908 Pichersky, E., Logsdon, J. M., McGrath, J. M. and Stasys, R. A. 1991. Fragments of plastid DNA  
909 in the nuclear genome of tomato: prevalence, chromosomal location and possible mechanism  
910 of integration. *Molecular and General Genetics* 225:453-458.

911 Pin, P.A., R. Benlloch, D. Bonnet, E. Wremerth-Weich, T. Kraft, J. Gielen, and O. Nilsson.  
912 2010. An antagonistic pair of FT homologs mediates the control of flowering time in sugar  
913 beet. *Science* 330:1397-1400.



- 914 Pin, P.A., W. Zhang, S.H. Vogt, N. Dally, B. Büttner, G. Schulze-Buxloh, N.S. Jelly, T.Y.P.  
915 Chia, E.S. Mutasa-Göttgens, J.C. Dohm, H. Himmelbauer, B. Weisshaar, J. Kraus, J.J.L.  
916 Gielen, M. Lommel, G. Weyens, B. Wahl, A. Schechert, O. Nilsson, C. Jung, T. Kraft, and  
917 A.E. Müller. 2012. The role of a pseudo-response regulator gene in life cycle adaptation and  
918 domestication of beet. *Current Biology* 22:1095-1101.
- 919 Pucker B (2019) Mapping-based genome size estimation. bioRxiv preprint first posted online  
920 Apr. 13, 2019; doi: <http://dx.doi.org/10.1101/607390>.
- 921 Putnam NH, O'Connell B, Stites JC, Rice BJ, Blanchette M, Calef R, Troll CJ, Fields A, Hartley  
922 PD, Sugnet CW, Haussler D, Rokhsar DS, Green RE. (2016) Chromosome-scale shotgun  
923 assembly using an *in vitro* method for long-range linkage. *Genome Res.* 26: 342-350.
- 924 Roessler K, Muyle A, Diez CM, Gaut GRJ, Bousious A, Stitzer MC, Seymour DK, Doebley JF,  
925 Liu Q, Gaut BS (2019) The genome-wide dynamics of purging during selfing in maize. *Nature*  
926 *Plants* 5: 980-990.
- 927 Schmidt T, Heslop-Harrison JS (1998) Genomes, genes and junk: the large-scale organization of  
928 plant chromosomes. *Trends Plant Sci* 3: 195-199.
- 929 Schmidt, T., Jung, C., Metzloff, M. (1991) Distribution and evolution of two satellite DNAs in  
930 the genus *Beta*. *Theor. Appl. Genetics* 82:793-799.
- 931 Schondelmaier, J., and C. Jung. 1997. Chromosomal assignment of the nine linkage groups of  
932 sugar beet (*Beta vulgaris* L.) using primary trisomics. *Theor. Appl. Genet.* 95:590-596.
- 933 Schwacke R, Ponce-Soto GY, Krause K, Bolger AM, Arsova B, Hallab A, Gruden K, Stitt M,  
934 Bolger ME, Usadel B (2019). MapMan4: A refined protein classification and annotation  
935 framework applicable to multi-omics data analysis. *Mol. Plant.* 12: 879–892.
- 936 Simão FA, Waterhouse RM, Ioannidis P, Kriventseva EV, and Zdobnov EM (2015) BUSCO:  
937 assessing genome assembly and annotation completeness with single-copy orthologs.  
938 *Bioinformatics*, published online June 9, 2015, doi: 10.1093/bioinformatics/btv351
- 939 Stanke, M., and Waack, S. (2003). Gene prediction with a hidden Markov model and a new  
940 intron submodel. *Bioinformatics* 19, ii215-ii225.

- 941 Taguchi K, Kuroda Y, Okazaki K, Yamasaki M. (2019) Genetic and phenotypic assessment of  
942 sugar beet (*Beta vulgaris* L. subsp. *vulgaris*) elite inbred lines selected in Japan during the past  
943 50 years. *Breeding Science* 69:255-265.
- 944 Taguchi, K. (2014) Genetics and breeding studies on *Aphanomyces* root rot resistance of sugar  
945 beet, covers from the discovery of genetic resources to development of new varieties. *Breed.*  
946 *Res.* 16:186–191
- 947 The UniProt Consortium (2017). UniProt: the universal protein knowledgebase. *Nucleic Acids*  
948 *Res.* 45, D158–D169.
- 949 Trebbi D, McGrath JM (2009) Functional differentiation of the sugar beet root system as  
950 indicator of developmental phase change. *Physiologia Plantarum* 135: 84–97.
- 951 Tuskan, G.A., DiFazio, S., Jansson, S., Bohlmann, J., Grigoriev, I., Hellsten, U., Putnam, N.,  
952 Ralph, S., Rombauts, S., Salamov, A., et al. (2006). The Genome of Black Cottonwood,  
953 *Populus trichocarpa* (Torr. & Gray). *Science* 313, 1596–1604.
- 954 Wang Y, Tang H, DeBarry JD, Tan X, Li J, Wang X, Lee TH, Jin H, Marler B, Guo H, Kissinger  
955 JC, Paterson AH. (2012) MCScanX: A toolkit for detection and evolutionary analysis of gene  
956 synteny and collinearity. *Nucleic Acids Res*, 40(7): e49.
- 957 Whitney KD, Baack EJ, Hamrick JL, Godt MJW, Barringer BC, Bennett MD, Eckert CG,  
958 Goodwillie C, Kalisz S, Leitch IJ, Ross-Ibarra J. (2010) A role for nonadaptive processes in  
959 plant genome size evolution? *Evolution* 64: 2097–2109.
- 960 Yang W-D, Tan H-W, Zhu W-M (2016) SpinachDB: A well-characterized genomic database for  
961 gene family classification and SNP information of spinach. *PLoS ONE* 11: e0152706.  
962 doi:10.1371/journal.pone.0152706.
- 963 Yang Y, Moore MJ, Brockington SF, Soltis DE, Wong GK, Carpenter EJ, Zhang Y, Chen L,  
964 Yan Z, Xie Y, Sage RF, Covshoff S, Hibberd JM, Nelson MN, Smith SA. (2015) Dissecting  
965 molecular evolution in the highly diverse plant clade Caryophyllales using transcriptome  
966 sequencing. *Mol Biol Evol* 32:2001-2014.
- 967 Yang, Z. (2007) PAML 4: Phylogenetic analysis by maximum likelihood. *Molecular Biology*  
968 *and Evolution* 24:1586-1591.



970 **Table legends:**

971 Table 1: Sequence inputs and metrics used in construction of EL10.1.

972 Table 2: Assembly metrics for EL10.1 and sequence assembly iterations.

973 Table 3: Inversions in the EL10.1 genome assembly assessed using genetic markers.

974 Table 4: Co-locations of Scaffolds and Chromosomes deduced by genetically mapped markers.

975 Table 5: Orientation of EL10.1 Chromosomes relative to the cytogenetic map of Paesold et al.

976 (2012).

977 Table 6: The Y-R-B linkage group in the EL10.1 genome assembly.

978 Table 7: Gene models detected via Benchmarking Universal Single-Copy Orthologs (BUSCO).

979 Table 8: Distribution of MAKER annotations across the EL10.1 genome assembly.

980 Table 9: Comparison of MapMan4 first-order functional classifications for EL10.1 and four

981 other Tracheophytes [*Oryza sativa* (*Os*) *Brachypodium distachyon* (*Bd*), *Arabidopsis thaliana*

982 (*At*), *Solanum lycopersicum* (*Sl*), and *Manihot esculenta* (*Me*)].

983 Table 10: Comparison of MapMan4 leaf bins where no gene was predicted by MAKER in

984 EL10.1 and five Tracheophytes [*Oryza sativa* (*Os*) *Brachypodium distachyon* (*Bd*),

985 *Arabidopsis thaliana* (*At*), *Solanum lycopersicum* (*Sl*), and *Manihot esculenta* (*Me*)].

986 Table 11: Comparison of over- and under-represented MapMan4 second-order functional

987 classifications for EL10.1 and four other Tracheophytes [*Oryza sativa* (*Os*) *Brachypodium*

988 *distachyon* (*Bd*), *Arabidopsis thaliana* (*At*), *Solanum lycopersicum* (*Sl*), and *Manihot esculenta*

989 (*Me*)].

990 Table 12: Comparison of Transcription factor classes for EL10.1 and four other Tracheophytes

991 [*Oryza sativa* (*Os*) *Brachypodium distachyon* (*Bd*), *Arabidopsis thaliana* (*At*), *Solanum*

992 *lycopersicum* (*Sl*), and *Manihot esculenta* (*Me*)].

993 Table 13: Beet genome size estimates obtained by flow cytometry.

994 Table 14: Frequency of Transposable Element (TE) classes in the EL10.1 genome assembly. A.

995 RepeatMasker-derived annotations. B. Complete LTR retrotransposons. C. Interstitial repeat

996 classes (from Kowar et al. 2016), D. Terminal repeat locations (from Dechyeva and Schmidt

997 2006) integrated with cytogenetic orientation (parentheses indicate reversed orientation relative  
998 to Paesold et al. 2012).

999 Table 15: Characteristics of tandem repeats in the EL10.1 genome assembly.

1000 Table 16: Read count mapping of short reads from EL10 and four other germplasms to the  
1001 EL10.1 genome assembly.

1002 Table 17: Proportion and metrics of synteny (co-linear blocks of MAKER beet gene predictions)  
1003 shared among five species.

1004

1005 **Figure Legends:**

1006 Figure 1: Chromosome alignment of the EL10 assembly (x-axis) versus RefBeet-1.2 assembly  
1007 (y-axis) by EL10.1 Chromosome. Alignments less than 5 kb in length were removed before  
1008 plotting. Alignments with matching orientation are shown in red, inversions are show in blue.  
1009 Unassembled RefBeet regions are indicated by gaps.

1010 Figure 2: Comparison of contiguity between EL10.1 and EL10.2 genome assemblies.  
1011 Alignments with matching orientation are shown in red, inversions are show in blue.

1012 Figure 3: Self-synteny of EL10.1 Chromosomes against the EL10.1 predicted protein set.

1013 Figure 4: Distribution of LTR Copia and Gypsy retrotransposon elements across the EL10.1  
1014 Chromosomes.

1015 Figure 5: Copy number per consensus tandem repeat length in the EL10.1 genome assembly.

1016 Figure 6: LTR Assembly Index (LAI) of the RefBeet assembly (A) and EL10 assembly (B) of  
1017 the sugar beet genome. X-axes denote pseudochromosomes of the two assemblies. Each dot  
1018 represents regional LAI in a 3 Mb window. Red-dotted lines indicate the LAI cutoff of the  
1019 reference genome quality (LAI = 10). Blue-dotted lines indicate the mean LAI.

1020 Figure 7: Read count mapping of short reads from EL10 and four other germplasms to the  
1021 EL10.1 genome assembly and the standard deviation of reads mapped to each 5 kb window  
1022 across the entire EL10.1 genome assembly.

1023 Figure 8: Distribution of high-copy number variant differences (>2000 copies per 5 kb window)  
1024 between open pollinated population C869\_25 and four inbred sugar beets across Chromosome  
1025 1 of the EL10.1 genome assembly.

1026 Figure 9: Visualization of syntenic blocks among Caryophyllales genomes relative to *B. vulgaris*  
1027 EL10.1 Chromosomes compared with two representative Rosid species, color coded by EL10.1  
1028 Chromosome.

Table 1: Sequence inputs and metrics used in construction of EL10.1

| Technology             | Library                                                                              |                                             | Coverage <sup>1</sup> |
|------------------------|--------------------------------------------------------------------------------------|---------------------------------------------|-----------------------|
| PacBio long reads      | RS II, P6-C4 chemistry                                                               | <b>PacBio passed reads</b><br>6,540,795     | 79.3                  |
|                        | Mean length = 9,096 nt (std.dev = 6,528)<br>> 40 kb initial mapping and pre-assembly | 5,176                                       | 0.38                  |
| Optical physical map   | BioNano Genomics <i>Bss</i> SI - <i>Bsp</i> PQ1 Hybrid Scaffold                      | <b>BioNano passed labels</b><br>121 Gb      | 161.3                 |
|                        | <i>Bsp</i> PQ1 (7.6 labels/100 kb)                                                   | 40 Gb                                       |                       |
|                        | <i>Bss</i> SI (10 labels/100 kb)                                                     | 81 Gb                                       |                       |
| Paired-End short reads | HiSeq 2500, TruSeq Libraries, 125bp PE                                               | <b>Illumina passed reads</b><br>447,211,041 | 149.0                 |
|                        | Phase Genomics Hi-C library, HiSeq 2500, TruSeq Libraries (EL10.1)                   | 355,892,798                                 | 118.6                 |
|                        | Dovetail Genomics Hi-C library, HiSeq 10X, TruSeq Libraries (EL10.2)                 | 927,545,984                                 | 183.3                 |

<sup>1</sup> Using genome size of 758 Mb

Table 2: Assembly metrics for EL10.1 and sequence assembly iterations.

| Assembly by input and method   | Name               | # Contigs | % Scaffolded | Total size | N50          |                   |       | % >100 kb | # Scaffolds | Total size | N50          |                   |      | %N | Coverage % <sup>1</sup> |
|--------------------------------|--------------------|-----------|--------------|------------|--------------|-------------------|-------|-----------|-------------|------------|--------------|-------------------|------|----|-------------------------|
|                                |                    |           |              |            | (x 1,000 nt) | NG50 <sup>1</sup> |       |           |             |            | (x 1,000 nt) | NG50 <sup>1</sup> |      |    |                         |
| RefBeet 1.2 (Dohm et al. 2014) | RefBeet            | 60,051    | 93.7         | 517,882    | 43.8         | nd                | 1.0   | 40,508    | 566,571     | 2,013      | nd           | 8.60              | nd   |    |                         |
| EL10.1 PacBio                  | SBJ_80X            | 938       | na           | 562,760    | 1,394        | 1,228             | 70.9  | 938       | 562,760     | 1,394      | 1,228        | 0.00              | 89.6 |    |                         |
| EL10.1 PacBio BioNano          | SBJ_80X_BN         | 2,983     | 99.2         | 533,042    | 1,340        | 1,093             | 21.5  | 86        | 566,848     | 12,513     | 10,655       | 5.90              | 90.3 |    |                         |
| EL10.1 PacBio BioNano Hi-C     | EL10.1             | 364       | 96.2         | 540,479    | 2,701        | 2,335             | 96.7  | 40        | 540,537     | 57,939     | 57,353       | 0.01              | 86.1 |    |                         |
|                                | Chromosome_1       | 47        | 100          | 58,076     | 2,421        | nd                | 100.0 | 1         | 58,086      | na         | nd           | 0.02              | 9.2  |    |                         |
|                                | Chromosome_2       | 30        | 100          | 54,968     | 2,834        | nd                | 96.7  | 1         | 54,972      | na         | nd           | 0.01              | 9.2  |    |                         |
|                                | Chromosome_3       | 22        | 100          | 54,096     | 3,728        | nd                | 100.0 | 1         | 54,100      | na         | nd           | 0.01              | 8.6  |    |                         |
|                                | Chromosome_4       | 47        | 100          | 61,154     | 2,396        | nd                | 97.9  | 1         | 61,163      | na         | nd           | 0.01              | 9.7  |    |                         |
|                                | Chromosome_5       | 30        | 100          | 59,218     | 3,579        | nd                | 93.3  | 1         | 59,225      | na         | nd           | 0.01              | 9.4  |    |                         |
|                                | Chromosome_6       | 52        | 100          | 65,091     | 2,381        | nd                | 98.1  | 1         | 65,097      | na         | nd           | 0.01              | 10.4 |    |                         |
|                                | Chromosome_7       | 40        | 100          | 57,345     | 2,831        | nd                | 95.0  | 1         | 57,354      | na         | nd           | 0.02              | 9.1  |    |                         |
|                                | Chromosome_8       | 37        | 100          | 57,932     | 2,335        | nd                | 97.3  | 1         | 57,939      | na         | nd           | 0.01              | 9.2  |    |                         |
|                                | Chromosome_9       | 28        | 100          | 52,176     | 2,382        | nd                | 100.0 | 1         | 52,180      | na         | nd           | 0.01              | 8.3  |    |                         |
|                                | Unplaced Scaffolds | 31        | 0            | 20,421     | 1,679        | nd                | 87.1  | 31        | 20,421      | na         | nd           | 0.00              | 3.3  |    |                         |
| EL10.2 PacBio BioNano Hi-C     | EL10.2             | 3,098     | 99.9         | 533,041    | 1,283        | nd                | 21.1  | 18        | 567,031     | 61,792     | nd           | 5.99              | 90.3 |    |                         |
|                                | Chromosome_1       | 505       | 100          | 58,689     | 1,093        | nd                | 16.0  | 1         | 64,154      | na         | nd           | 8.52              | 10.2 |    |                         |
|                                | Chromosome_2       | 253       | 100          | 53,946     | 1,566        | nd                | 21.3  | 1         | 56,769      | na         | nd           | 4.97              | 9.0  |    |                         |
|                                | Chromosome_3       | 181       | 100          | 54,788     | 1,907        | nd                | 28.7  | 1         | 57,123      | na         | nd           | 4.00              | 9.1  |    |                         |
|                                | Chromosome_4       | 406       | 100          | 61,919     | 1,225        | nd                | 20.0  | 1         | 66,143      | na         | nd           | 6.39              | 10.5 |    |                         |
|                                | Chromosome_5       | 276       | 100          | 64,991     | 1,635        | nd                | 21.4  | 1         | 67,720      | na         | nd           | 4.03              | 10.8 |    |                         |
|                                | Chromosome_6       | 423       | 100          | 68,152     | 1,004        | nd                | 23.6  | 1         | 72,250      | na         | nd           | 5.67              | 11.5 |    |                         |
|                                | Chromosome_7       | 349       | 100          | 57,001     | 1,144        | nd                | 22.6  | 1         | 60,906      | na         | nd           | 6.41              | 9.7  |    |                         |
|                                | Chromosome_8       | 245       | 100          | 59,411     | 1,155        | nd                | 31.8  | 1         | 61,792      | na         | nd           | 3.85              | 9.8  |    |                         |
|                                | Chromosome_9       | 308       | 100          | 51,533     | 1,527        | nd                | 18.8  | 1         | 55,602      | na         | nd           | 7.32              | 8.9  |    |                         |
|                                | Unplaced Scaffolds | 152       | 97.4         | 2,613      | 252          | nd                | 0.0   | 9         | 4,573       | na         | nd           | 42.86             | 0.7  |    |                         |

<sup>1</sup> Based on 628 Mb Physical Map



Table 3: Inversions in the EL10.1 genome assembly assessed using genetic markers.

| EL10.1       | Position (Mb) | SES Marker |
|--------------|---------------|------------|
|              |               | Position   |
| Chromosome_7 | 0.2           | 7          |
| Chromosome_7 | 9.5           | 45         |
| Chromosome_7 | 10.3          | 30         |
| Chromosome_7 | 14.1          | 28         |
| Chromosome_7 | 15.8          | 18         |
| Chromosome_7 | 19.7          | 27         |
| Chromosome_7 | 19.9          | 18         |
| Chromosome_7 | 21.8          | 3          |
| Chromosome_7 | 24.8          | 32         |
| Chromosome_7 | 57.3          | 44         |
| Chromosome_9 | 3.1           | 67         |
| Chromosome_9 | 25.2          | 50         |
| Chromosome_9 | 25.8          | 8          |
| Chromosome_9 | 34.5          | 50         |
| Chromosome_9 | 41.3          | 71         |
| Chromosome_9 | 50.6          | 74         |

Table 4: Co-locations of Scaffolds and Chromosomes deduced by genetically mapped markers.

| EL10.1<br>Chromosome | EL10.1<br>Scaffold | Orientation | Bin Position (genomic<br>coordinates) |
|----------------------|--------------------|-------------|---------------------------------------|
| Chromosome_1         | Scaffold_07        | reverse     | 58,086,001 - end                      |
| Chromosome_2         | Scaffold_19        | unknown     | 30,001,550 - 30,051,550               |
| Chromosome_3         | Scaffold_03        | reverse     | 27,470,050 - 27,610,050               |
| Chromosome_5         | Scaffold_05        | reverse     | end - 216,554                         |
| Chromosome_5         | Scaffold_04        | forward     | 19,422,050 - 19,462,050               |
| Chromosome_5         | Scaffold_01        | forward     | 24,502,050 - 24,632,050               |
| Chromosome_5         | Scaffold_14        | reverse     | 45,192,050 - 45,212,050               |
| Chromosome_6         | Scaffold_02        | forward     | 14,450,050 - 14,610,050               |
| Chromosome_6         | Scaffold_08        | forward     | 61,492,050 - 61,552,050               |

Table 5: Orientation of EL10.1 Chromosomes relative to the cytogenetic map of Paesold et al. (2012).

| EL10.1 chromosome | EL10.1 position | EL10.1 orientation | Cytogenetic orientation <sup>1</sup> | Orientation match | Marker Name <sup>1</sup> | Forward primer <sup>1</sup> |
|-------------------|-----------------|--------------------|--------------------------------------|-------------------|--------------------------|-----------------------------|
| Chromosome_1      | 225,015         | North              | 1-North                              | yes               | KWS_m2937                | GGCCAAACATAGCCAGCTTA        |
| Chromosome_1      | 218,834         | North              | 1-North                              | yes               | KWS_m3793                | GAGAACGGGAGTGGAATGAAC       |
| Chromosome_1      | 15,717,829      | South              | 1-South                              | yes               | KWS_m3888                | TCTTTGTTGGAATTTCTCAGG       |
| Chromosome_2      | 54,934,037      | South              | 2-North                              | no                | KWS_m2759                | TTCCAGTCTCGTCTCTTTCACA      |
| Chromosome_2      | 54,930,551      | South              | 2-North                              | no                | KWS_m4860                | CCTTAGAGCACCCACAAATGA       |
| Chromosome_2      | 2,092,719       | North              | 2-South                              | no                | KWS_m3192                | TGAGAGAGGGAAACCTCCAAT       |
| Chromosome_3      | 341,073         | North              | 3-North                              | yes               | KWS_m4507                | CTTCTCTGACCCAGATACCC        |
| Chromosome_3      | 309,368         | North              | 3-North                              | yes               | KWS_m4995                | GGGGTGTGATGTTGCTGTAT        |
| Chromosome_3      | 53,402,665      | South              | 3-South                              | yes               | KWS_m2641                | GAGAAAGACCAAAAAGATGCAGA     |
| Chromosome_4      | 60,902,981      | South              | 4-North                              | no                | KWS_m4363                | CGCTGGACGTGAGAGTTAGAG       |
| Chromosome_4      | 203,419         | North              | 4-South                              | no                | KWS_m5057                | GGTATTGATGGGGTGAAGGTT       |
| Chromosome_5      | 59,033,483      | South              | 5-North                              | no                | KWS_m4394                | AGTGCCCTCACAACCTCCATC       |
| Chromosome_5      | 59,027,813      | South              | 5-North                              | no                | KWS_m4890                | ACTCAACAAAGGGGCATCAC        |
| Scaffold_5        | 1,244,762       | North              | 5-South                              | no                | KWS_m3442                | TTCCTCTCTCCCAACAACCT        |
| Scaffold_5        | 1,167,474       | North              | 5-South                              | no                | KWS_m4060                | TGAATCTTCCCAGACCATC         |
| Chromosome_6      | 65,032,325      | South              | 6-North                              | no                | KWS_m4895                | CGGTGGAGCGAGTTTTAGAG        |
| Chromosome_6      | 551,047         | North              | 6-South                              | no                | KWS_m4682                | GGTGACATCCAACCTCCGCTAC      |
| Chromosome_7      | 21,678,063      | South              | 7-North                              | no                | KWS_m4047                | ACACAACCGCATTCTCTTCC        |
| Chromosome_7      | 81,844          | North              | 7-South                              | no                | KWS_m4448                | TGAGAGCTGGAACAAACAAGA       |
| Chromosome_8      | 56,578,861      | South              | 8-North                              | no                | KWS_m2221                | CCATAGTGGTGGTGCTTTTCA       |
| Chromosome_8      | 866,773         | North              | 8-South                              | no                | KWS_m3801                | CGGAGAGCAGAGCATTACTTC       |
| Chromosome_9      | 50,453,056      | South              | 9-North                              | no                | KWS_m4595                | TGTTGCGATTCTGTGCAT          |
| Chromosome_9      | 34,138,985      | uncertain          | 9-South                              | no                | KWS_m3315                | TGGCCTTGACATACTCCAAC        |

<sup>1</sup> From Paesold et al. (2012) Supplemental Table, based on RefBeet.

Table 6: The Y-R-B linkage group in the EL10.1 genome assembly.

| Gene     | ID            | MAKER Inferred Annotation     | EL10.1_start..stop (strand)    | cM <sup>1</sup> | Mb   | Mb/cM |
|----------|---------------|-------------------------------|--------------------------------|-----------------|------|-------|
| <i>Y</i> | EL10Ac2g04466 | MYB114                        | 49,675,759..49,679,064 (plus)  | 7.4             | 2.4  | 0.32  |
| <i>R</i> | EL10Ac2g04268 | Geraniol 8-hydroxylase        | 47,304,905..47,309,543 (minus) | 17.3            | 14.7 | 0.85  |
| <i>B</i> | EL10Ac2g03535 | Response regulator-like PRR73 | 32,610,511..32,619,244 (minus) |                 |      |       |

<sup>1</sup> From Abe (1993), Goldman and Austin (2000)

Table 7: Gene models detected via Benchmarking Universal Single-Copy Orthologs (BUSCO).

| BUSCO                    | EL10.1 | RefBeet 1.1 | TAIR 10 |
|--------------------------|--------|-------------|---------|
| Complete                 | 1,251  | 1,302       | 1,414   |
| Complete and single-copy | 1,223  | 1,268       | 1,401   |
| Complete and duplicated  | 28     | 34          | 13      |
| Fragmented               | 36     | 37          | 7       |
| Missing                  | 153    | 101         | 19      |
| Total groups searched    | 1,440  | 1,440       | 1,440   |
| % Missing                | 10.6   | 7.0         | 1.3     |

Table 8: Distribution of MAKER annotations across the EL10.1 genome assembly.

| Location         | # genes | # hypothetical | %     | Unique  | %      |
|------------------|---------|----------------|-------|---------|--------|
| Total            | 24,255  | 3,940          | 16.24 | 13,220  | 54.50  |
| Chromosome 1     | 2,393   | 354            | 14.79 | 1,375   | 57.46  |
| Chromosome 2     | 2,525   | 383            | 15.17 | 1,379   | 54.61  |
| Chromosome 3     | 2,574   | 372            | 14.45 | 1,458   | 56.64  |
| Chromosome 4     | 2,903   | 463            | 15.95 | 1,410   | 48.57  |
| Chromosome 5     | 2,687   | 422            | 15.71 | 1,452   | 54.04  |
| Chromosome 6     | 2,681   | 446            | 16.64 | 1,478   | 55.13  |
| Chromosome 7     | 2,487   | 385            | 15.48 | 1,380   | 55.49  |
| Chromosome 8     | 2,391   | 353            | 14.76 | 1,316   | 55.04  |
| Chromosome 9     | 2,387   | 338            | 14.16 | 1,320   | 55.30  |
| Scaffold 1       | 117     | 54             | 46.15 | 55      | 47.01  |
| Scaffold 2       | 141     | 60             | 42.55 | 65      | 46.10  |
| Scaffold 3       | 87      | 39             | 44.83 | 48      | 55.17  |
| Scaffold 4       | 94      | 38             | 40.43 | 46      | 48.94  |
| Scaffold 5       | 162     | 22             | 13.58 | 121     | 74.69  |
| Scaffold 6       | 79      | 28             | 35.44 | 36      | 45.57  |
| Scaffold 7       | 119     | 50             | 42.02 | 54      | 45.38  |
| Scaffold 8       | 91      | 15             | 16.48 | 66      | 72.53  |
| Scaffold 9       | 35      | 15             | 42.86 | 16      | 45.71  |
| Scaffold 10      | 25      | 10             | 40.00 | 15      | 60.00  |
| Scaffold 11      | 19      | 12             | 63.16 | 3       | 15.79  |
| Scaffold 12      | 46      | 10             | 21.74 | 33      | 71.74  |
| Scaffold 13      | 21      | 10             | 47.62 | 11      | 52.38  |
| Scaffold 14      | 30      | 6              | 20.00 | 15      | 50.00  |
| Scaffold 15      | 52      | 10             | 19.23 | 20      | 38.46  |
| Scaffold 16      | 5       | 3              | 60.00 | 2       | 40.00  |
| Scaffold 17      | 3       | 1              | 33.33 | 1       | 33.33  |
| Scaffold 18      | 15      | 2              | 13.33 | 9       | 60.00  |
| Scaffold 19      | 30      | 17             | 56.67 | 5       | 16.67  |
| Scaffold 20      | 16      | 9              | 56.25 | 7       | 43.75  |
| Scaffold 21      | 5       | 3              | 60.00 | 0       | 0.00   |
| Scaffold 22      | 10      | 4              | 40.00 | 6       | 60.00  |
| Scaffold 24      | 2       | 1              | 50.00 | 2       | 100.00 |
| Scaffold 25      | 1       | 0              | 0.00  | 1       | 100.00 |
| Scaffold 26      | 12      | 3              | 25.00 | 9       | 75.00  |
| Scaffold 27      | 4       | 2              | 50.00 | 0       | 0.00   |
| Scaffold 28      | 6       | 0              | 0.00  | 6       | 100.00 |
| Chromosome mean  | 2,558.7 | 390.7          |       | 1,396.4 |        |
| Chromosome stdev | 173.8   | 43.7           |       | 58.2    |        |
| Scaffold mean    | 43.8    | 15.1           |       | 23.3    |        |
| Scaffold stdev   | 47.6    | 17.5           |       | 28.8    |        |

Table 9: Comparison of MapMan4 first-order functional classifications for EL10.1 and four other Tracheophytes

| Bincode | Top level bin             | # MapMan4<br>leaf bins | # EL10.1<br>leaf bins | Mean Gene Count per Leaf Bin |           |           |           |       |              |            |              |       |      | EL10 mean /<br>Angiosperm mean |           |  |
|---------|---------------------------|------------------------|-----------------------|------------------------------|-----------|-----------|-----------|-------|--------------|------------|--------------|-------|------|--------------------------------|-----------|--|
|         |                           |                        |                       | At                           |           |           |           |       |              | Angiosperm |              |       |      |                                | EL10 mean |  |
|         |                           |                        |                       | <i>Os</i>                    | <i>Bd</i> | <i>Sl</i> | <i>Me</i> | Mean  | std dev      | std dev    | std dev      |       |      |                                |           |  |
| 1       | Photosynthesis            | 226                    | 223                   | 1.29                         | 1.71      | 1.78      | 1.54      | 1.50  | <b>1.57</b>  | 1.26       | <b>1.22</b>  | 0.94  | 78.2 |                                |           |  |
| 2       | Cellular respiration      | 136                    | 135                   | 1.81                         | 1.73      | 1.47      | 1.73      | 1.86  | <b>1.72</b>  | 1.17       | <b>0.93</b>  | 0.84  | 54.1 |                                |           |  |
| 3       | Carbohydrate metabolism   | 92                     | 92                    | 2.53                         | 2.51      | 2.30      | 2.64      | 3.05  | <b>2.61</b>  | 2.14       | <b>1.83</b>  | 1.65  | 70.0 |                                |           |  |
| 4       | Amino acid metabolism     | 135                    | 134                   | 1.77                         | 1.84      | 1.70      | 1.81      | 2.04  | <b>1.83</b>  | 1.27       | <b>1.46</b>  | 1.03  | 79.9 |                                |           |  |
| 5       | Lipid metabolism          | 173                    | 173                   | 2.57                         | 2.73      | 2.55      | 2.81      | 2.88  | <b>2.71</b>  | 3.02       | <b>1.95</b>  | 2.10  | 71.9 |                                |           |  |
| 6       | Nucleotide metabolism     | 53                     | 53                    | 1.94                         | 1.81      | 1.77      | 1.83      | 2.02  | <b>1.88</b>  | 1.20       | <b>1.47</b>  | 0.93  | 78.5 |                                |           |  |
| 7       | Coenzyme metabolism       | 158                    | 158                   | 1.40                         | 1.39      | 1.41      | 1.43      | 1.53  | <b>1.43</b>  | 0.89       | <b>1.27</b>  | 0.85  | 88.8 |                                |           |  |
| 8       | Polyamine metabolism      | 12                     | 12                    | 2.08                         | 2.00      | 1.50      | 2.08      | 2.67  | <b>2.07</b>  | 1.78       | <b>1.58</b>  | 1.38  | 76.6 |                                |           |  |
| 9       | Secondary metabolism      | 93                     | 90                    | 2.48                         | 1.88      | 1.63      | 2.00      | 2.34  | <b>2.07</b>  | 3.76       | <b>1.32</b>  | 1.98  | 64.0 |                                |           |  |
| 10      | Redox homeostasis         | 47                     | 47                    | 2.64                         | 2.64      | 2.45      | 2.91      | 3.11  | <b>2.75</b>  | 2.56       | <b>2.13</b>  | 2.23  | 77.4 |                                |           |  |
| 11      | Phytohormones             | 140                    | 140                   | 4.19                         | 3.72      | 3.65      | 4.26      | 5.42  | <b>4.25</b>  | 5.02       | <b>2.36</b>  | 2.67  | 55.6 |                                |           |  |
| 12      | Chromatin organisation    | 113                    | 113                   | 2.76                         | 2.73      | 2.96      | 3.16      | 2.93  | <b>2.91</b>  | 3.23       | <b>2.15</b>  | 2.23  | 74.0 |                                |           |  |
| 13      | Cell cycle                | 258                    | 258                   | 1.74                         | 1.59      | 1.66      | 1.67      | 1.85  | <b>1.70</b>  | 1.64       | <b>1.34</b>  | 1.03  | 78.6 |                                |           |  |
| 14      | DNA damage response       | 67                     | 67                    | 1.25                         | 1.16      | 1.31      | 1.24      | 1.24  | <b>1.24</b>  | 0.69       | <b>1.16</b>  | 0.86  | 93.8 |                                |           |  |
| 15      | RNA biosynthesis          | 295                    | 295                   | 7.84                         | 7.81      | 7.89      | 8.70      | 9.26  | <b>8.30</b>  | 21.32      | <b>5.28</b>  | 13.15 | 63.6 |                                |           |  |
| 16      | RNA processing            | 328                    | 327                   | 1.52                         | 1.50      | 1.54      | 1.58      | 1.65  | <b>1.56</b>  | 1.10       | <b>1.26</b>  | 0.93  | 81.0 |                                |           |  |
| 17      | Protein biosynthesis      | 328                    | 328                   | 1.92                         | 1.98      | 1.84      | 1.97      | 2.00  | <b>1.94</b>  | 1.24       | <b>1.45</b>  | 0.93  | 74.9 |                                |           |  |
| 18      | Protein modification      | 299                    | 299                   | 4.98                         | 5.68      | 5.13      | 4.90      | 6.11  | <b>5.36</b>  | 10.08      | <b>3.71</b>  | 5.90  | 69.2 |                                |           |  |
| 19      | Protein degradation       | 187                    | 187                   | 5.58                         | 5.81      | 5.87      | 5.83      | 6.26  | <b>5.87</b>  | 20.35      | <b>3.98</b>  | 13.21 | 67.9 |                                |           |  |
| 20      | Cytoskeleton              | 107                    | 107                   | 2.87                         | 2.35      | 2.39      | 2.63      | 3.14  | <b>2.67</b>  | 3.09       | <b>1.90</b>  | 1.85  | 70.9 |                                |           |  |
| 21      | Cell wall                 | 126                    | 126                   | 4.64                         | 4.24      | 3.90      | 4.29      | 5.10  | <b>4.43</b>  | 7.22       | <b>2.71</b>  | 4.24  | 61.2 |                                |           |  |
| 22      | Vesicle trafficking       | 212                    | 212                   | 2.60                         | 2.37      | 2.27      | 2.54      | 3.00  | <b>2.55</b>  | 3.14       | <b>1.91</b>  | 2.09  | 74.8 |                                |           |  |
| 23      | Protein translocation     | 135                    | 135                   | 1.48                         | 1.44      | 1.53      | 1.57      | 1.83  | <b>1.57</b>  | 1.04       | <b>1.19</b>  | 0.72  | 75.9 |                                |           |  |
| 24      | Solute transport          | 174                    | 173                   | 6.58                         | 7.14      | 6.73      | 7.33      | 7.95  | <b>7.15</b>  | 10.81      | <b>5.38</b>  | 7.95  | 75.3 |                                |           |  |
| 25      | Nutrient uptake           | 52                     | 50                    | 3.18                         | 2.54      | 2.66      | 2.68      | 3.52  | <b>2.92</b>  | 2.99       | <b>1.96</b>  | 2.38  | 67.2 |                                |           |  |
| 26      | External stimuli response | 111                    | 111                   | 3.25                         | 2.28      | 2.18      | 2.82      | 3.63  | <b>2.83</b>  | 6.57       | <b>1.77</b>  | 2.94  | 62.7 |                                |           |  |
| 27      | Multi-process regulation  | 38                     | 38                    | 3.66                         | 3.55      | 3.45      | 3.82      | 4.26  | <b>3.75</b>  | 4.22       | <b>2.39</b>  | 1.88  | 63.9 |                                |           |  |
| 50      | Enzyme classification     | 50                     | 44                    | 26.64                        | 42.70     | 33.25     | 41.52     | 39.84 | <b>36.79</b> | 76.72      | <b>25.66</b> | 50.56 | 69.7 |                                |           |  |
|         | total                     | 4145                   | 4127 (99.6%)          |                              |           |           |           |       |              |            |              |       |      |                                |           |  |
|         | mean                      |                        |                       | 3.43                         | 3.60      | 3.41      | 3.69      | 4.04  | 3.69         | 12.19      | 2.54         | 7.87  | 69.0 |                                |           |  |
|         | stdev                     |                        |                       | 10.03                        | 13.31     | 11.38     | 12.57     | 13.33 | 12.43        |            | 7.87         |       |      |                                |           |  |

Table 10: Comparison of MapMan4 leaf bins where no gene was predicted by MAKER in EL10.1 and five Tracheophytes.

| Bincode        | Description                                                                                                                                               | At | Os | Bd | Sl | Me | Angiosperm Mean |
|----------------|-----------------------------------------------------------------------------------------------------------------------------------------------------------|----|----|----|----|----|-----------------|
| 1.1.1.1.5      | Photosynthesis.photophosphorylation.photosystem II.LHC-II complex.LHCq component                                                                          | 1  | 1  | 1  | 2  | 1  | 1.2             |
| 1.1.1.2.1.5.2  | Photosynthesis.photophosphorylation.photosystem II.PS-II complex.reaction center complex.cytochrome b559 heterodimer.beta component.PsbF                  | 1  | 1  | 3  | 1  | 1  | 1.4             |
| 1.1.1.2.1.6    | Photosynthesis.photophosphorylation.photosystem II.PS-II complex.reaction center complex.component.Psbl                                                   | 1  | 1  | 2  | 3  | 2  | 1.8             |
| 1.1.1.2.4      | Photosynthesis.photophosphorylation.photosystem II.PS-II complex.component.PsbJ                                                                           | 1  | 1  | 5  | 1  | 2  | 2.0             |
| 1.1.1.2.5      | Photosynthesis.photophosphorylation.photosystem II.PS-II complex.component.PsbK                                                                           | 1  | 5  | 1  | 1  | 1  | 1.8             |
| 1.1.1.2.6      | Photosynthesis.photophosphorylation.photosystem II.PS-II complex.component.PsbL                                                                           | 1  | 1  | 6  | 1  | 1  | 2.0             |
| 1.1.1.2.7      | Photosynthesis.photophosphorylation.photosystem II.PS-II complex.component.PsbM                                                                           | 1  | 1  | 2  | 2  | 1  | 1.4             |
| 1.1.1.2.8      | Photosynthesis.photophosphorylation.photosystem II.PS-II complex.component.PsbN                                                                           | 1  | 1  | 3  | 1  | 1  | 1.4             |
| 1.1.1.2.10     | Photosynthesis.photophosphorylation.photosystem II.PS-II complex.component.PsbTc                                                                          | 1  | 1  | 4  | 1  | 1  | 1.6             |
| 1.1.1.3.9      | Photosynthesis.photophosphorylation.photosystem II.assembly and maintenance.Psb27 protein                                                                 | 1  | 1  | 1  | 1  | 1  | 1.0             |
| 1.1.1.6.1.2    | Photosynthesis.photophosphorylation.photosystem II.LHC-related protein groups.one-helix LHC-related protein group.OHP2 protein                            | 1  | 1  | 1  | 2  | 2  | 1.4             |
| 1.1.2.5        | Photosynthesis.photophosphorylation.cytochrome b6/f complex.component.PetG/V                                                                              | 1  | 1  | 6  | 1  | 1  | 2.0             |
| 1.1.2.6        | Photosynthesis.photophosphorylation.cytochrome b6/f complex.component.PetL/VI                                                                             | 1  | 1  | 3  | 2  | 1  | 1.6             |
| 1.1.2.9.2.1    | Photosynthesis.photophosphorylation.cytochrome b6/f complex.assembly.CCS cytochrome f/c6 maturation system (system II).CcsA component                     | 1  | 2  | 2  | 6  | 2  | 2.6             |
| 1.1.2.9.3      | Photosynthesis.photophosphorylation.cytochrome b6/f complex.assembly.HCF153 factor                                                                        | 1  | 1  | 1  | 1  | 1  | 1.0             |
| 1.1.4.1.1      | Photosynthesis.photophosphorylation.photosystem I.LHC-I complex.LHCA1-type component                                                                      | 1  | 1  | 1  | 2  | 2  | 1.4             |
| 1.1.4.2.9      | Photosynthesis.photophosphorylation.photosystem I.PS-I complex.component.PsaI                                                                             | 1  | 1  | 5  | 2  | 1  | 2.0             |
| 1.1.4.2.10     | Photosynthesis.photophosphorylation.photosystem I.PS-I complex.component.PsaJ                                                                             | 1  | 1  | 3  | 2  | 1  | 1.6             |
| 1.1.5.2.1      | Photosynthesis.photophosphorylation.linear electron flow.ferredoxin-NADP reductase (FNR) activity.ferredoxin-NADP oxidoreductase                          | 2  | 2  | 2  | 2  | 3  | 2.2             |
| 1.1.8.1.1.7    | Photosynthesis.photophosphorylation.chlororespiration.NADH dehydrogenase-like (NDH) complex.membrane subcomplex M.NdhG component                          | 1  | 3  | 5  | 4  | 1  | 2.8             |
| 1.1.8.1.2.1    | Photosynthesis.photophosphorylation.chlororespiration.NADH dehydrogenase-like (NDH) complex.subcomplex A.NdhH component                                   | 1  | 3  | 1  | 1  | 1  | 1.4             |
| 1.1.8.1.2.2    | Photosynthesis.photophosphorylation.chlororespiration.NADH dehydrogenase-like (NDH) complex.subcomplex A.NdhI component                                   | 1  | 2  | 2  | 4  | 1  | 2.0             |
| 1.1.8.1.4.1    | Photosynthesis.photophosphorylation.chlororespiration.NADH dehydrogenase-like (NDH) complex.lumen subcomplex L.PnsL1 component                            | 1  | 1  | 1  | 1  | 1  | 1.0             |
| 1.1.9.1.4      | Photosynthesis.photophosphorylation.ATP synthase complex.membrane CF0 subcomplex.subunit c                                                                | 1  | 3  | 1  | 1  | 2  | 1.6             |
| 2.4.1.4.1.5    | Cellular respiration.oxidative phosphorylation.NADH dehydrogenase complex.non-core components.alpha subcomplex.NDUFA9 component                           | 1  | 1  | 1  | 1  | 2  | 1.2             |
| 2.4.1.4.2.3    | Cellular respiration.oxidative phosphorylation.NADH dehydrogenase complex.non-core components.beta subcomplex.NDUFB7 component                            | 1  | 1  | 1  | 1  | 2  | 1.2             |
| 2.4.3.6        | Cellular respiration.oxidative phosphorylation.cytochrome c reductase complex.QCR7 component                                                              | 2  | 3  | 2  | 1  | 2  | 2.0             |
| 3.1.2.5        | Carbohydrate metabolism.sucrose metabolism.synthesis.cytosolic phosphoglucomutase                                                                         | 2  | 1  | 1  | 1  | 2  | 1.4             |
| 3.2.2.1.3      | Carbohydrate metabolism.starch metabolism.degradation.phosphorylation.ESV1 dikinase regulator                                                             | 1  | 1  | 1  | 1  | 2  | 1.2             |
| 3.2.2.4.2      | Carbohydrate metabolism.starch metabolism.degradation.sugar translocation.glucose transporter                                                             | 1  | 1  | 1  | 1  | 2  | 1.2             |
| 3.8.9.2.1      | Carbohydrate metabolism.nucleotide sugar biosynthesis.UDP-N-acetylglucosamine synthesis.salvage biosynthesis.N-acetylglucosamine kinase                   | 1  | 2  | 2  | 2  | 3  | 2.0             |
| 4.1.1.1.1.2    | Amino acid metabolism.biosynthesis.glutamate family.glutamate-derived amino acids.ornithine.N-acetylglutamate kinase                                      | 1  | 2  | 2  | 1  | 2  | 1.6             |
| 4.1.2.2.3.3    | Amino acid metabolism.biosynthesis.aspartate family.aspartate-derived amino acids.lysine.LL-diaminopimelate aminotransferase                              | 1  | 1  | 2  | 1  | 1  | 1.2             |
| 5.7.3.1        | Lipid metabolism.lipid degradation.fatty acid degradation.peroxisomal long-chain acyl-CoA synthetase                                                      | 2  | 2  | 2  | 1  | 3  | 2.0             |
| 5.8.1.3        | Lipid metabolism.lipid transport.plastidial lipid import.TGD5 lipid trafficking cofactor                                                                  | 1  | 1  | 1  | 1  | 1  | 1.0             |
| 6.2.4.3        | Nucleotide metabolism.pyrimidines.salvage pathway.ribokinase                                                                                              | 1  | 1  | 1  | 1  | 1  | 1.0             |
| 7.2.1.2        | Coenzyme metabolism.thiamine pyrophosphate synthesis.hydroxymethylpyrimidine diphosphate synthesis.bifunctional hydroxymethylpyrimidine kinase a          | 1  | 1  | 1  | 1  | 1  | 1.0             |
| 7.12.1.2       | Coenzyme metabolism.tetrapyrrol biosynthesis.5-aminolevulinic acid formation.glutamyl-tRNA reductase                                                      | 3  | 1  | 2  | 2  | 2  | 2.0             |
| 9.1.2.3        | Secondary metabolism.terpenoids.methylerythritol phosphate pathway.DXR 1-deoxy-D-xylulose 5-phosphate reductase                                           | 1  | 1  | 1  | 1  | 2  | 1.2             |
| 9.1.3.4.5      | Secondary metabolism.terpenoids.terpenoid synthesis.carotenoid metabolism.LCY-e lycopen epsilon cyclase                                                   | 1  | 1  | 1  | 1  | 1  | 1.0             |
| 9.2.2.8.1      | Secondary metabolism.phenolics.flavonoid synthesis and modification.isoflavonoids.isoflavone synthase                                                     | 1  | 1  | 1  | 1  | 4  | 1.6             |
| 9.2.3.2        | Secondary metabolism.phenolics.regulation of key enzymes.KFB-CHS proteolytic chalcone synthase regulator                                                  | 1  | 2  | 1  | 1  | 1  | 1.2             |
| 10.6.2         | Redox homeostasis.cytosol/mitochondrion/nucleus redox homeostasis.O-type thioredoxin                                                                      | 2  | 1  | 1  | 1  | 1  | 1.2             |
| 11.3.1.3       | Phytohormones.brassinosteroid.synthesis.steroid 5-alpha-reductase (DET2)                                                                                  | 1  | 1  | 1  | 1  | 1  | 1.0             |
| 11.5.2.2       | Phytohormones.ethylene.perception and signal transduction.protein kinase (CTR1)                                                                           | 1  | 2  | 2  | 3  | 2  | 2.0             |
| 11.8.2.1       | Phytohormones.salicylic acid.perception and signal transduction.NPR3/4 receptor protein                                                                   | 2  | 2  | 2  | 2  | 2  | 2.0             |
| 11.10.1.4.1    | Phytohormones.signalling peptides.NCRP (non-cysteine-rich-peptide) category.CIF family.CIF precursor polypeptide                                          | 2  | 2  | 3  | 1  | 1  | 1.8             |
| 11.10.1.5.1    | Phytohormones.signalling peptides.NCRP (non-cysteine-rich-peptide) category.IDL family.IDA/IDL precursor polypeptide                                      | 6  | 1  | 1  | 3  | 9  | 4.0             |
| 11.10.1.6.1    | Phytohormones.signalling peptides.NCRP (non-cysteine-rich-peptide) category.DVL/ROT family.DVL/RTFL precursor polypeptide                                 | 24 | 7  | 15 | 3  | 22 | 14.2            |
| 11.10.2.3.3    | Phytohormones.signalling peptides.CRP (cysteine-rich-peptide) category.EPF/EPFL family.TMM peptide receptor                                               | 2  | 1  | 2  | 3  | 5  | 2.6             |
| 12.4.1.1.1     | Chromatin organisation.chromatin remodeling complexes.ATPase core components.Snf2-like group.Alc chromatin remodeling factor                              | 1  | 1  | 1  | 1  | 1  | 1.0             |
| 12.4.1.4.2     | Chromatin organisation.chromatin remodeling complexes.ATPase core components.SSO1653-like group.Mot1 chromatin remodeling factor                          | 1  | 2  | 1  | 1  | 1  | 1.2             |
| 12.4.1.5.3     | Chromatin organisation.chromatin remodeling complexes.ATPase core components.Rad5/16-like group.Ris1 chromatin remodeling factor                          | 5  | 3  | 4  | 1  | 2  | 3.0             |
| 13.1.1.5       | Cell cycle.regulation.cyclins.CYH-type cyclin                                                                                                             | 1  | 1  | 1  | 2  | 1  | 1.2             |
| 13.1.1.9       | Cell cycle.regulation.cyclins.SDS-type cyclin                                                                                                             | 1  | 1  | 1  | 1  | 1  | 1.0             |
| 13.2.2.3.1.1   | Cell cycle.interphase.DNA replication.elongation.DNA polymerase alpha complex.POLA1 catalytic component                                                   | 1  | 1  | 1  | 1  | 1  | 1.0             |
| 13.2.2.3.4.2.4 | Cell cycle.interphase.DNA replication.elongation.DNA-tracking platform.PCNA sliding clamp loader complex.RFC4 component                                   | 1  | 1  | 1  | 1  | 1  | 1.0             |
| 13.3.2         | Cell cycle.mitosis and meiosis.TPX2 prospindle assembly factor                                                                                            | 1  | 1  | 1  | 3  | 1  | 1.4             |
| 13.3.3.1.3     | Cell cycle.mitosis and meiosis.chromosome segregation.centromere assembly and maintenance.KNL2/Mis18 CENH3 recruitment factor                             | 1  | 2  | 2  | 1  | 1  | 1.4             |
| 13.3.5.5.1     | Cell cycle.mitosis and meiosis.sister chromatid separation.spindle assembly checkpoint machinery.BUB1 checkpoint protein                                  | 1  | 1  | 1  | 1  | 1  | 1.0             |
| 13.3.6.2.1.1   | Cell cycle.mitosis and meiosis.meiotic recombination.meiotic double strand break initiation.meiotic topoisomerase-VI complex.component a (SPO11)          | 2  | 2  | 1  | 1  | 2  | 1.6             |
| 13.3.6.2.5     | Cell cycle.mitosis and meiosis.meiotic recombination.meiotic double strand break initiation.accessory protein (DFO)                                       | 1  | 2  | 1  | 1  | 1  | 1.2             |
| 13.3.6.5.1.7   | Cell cycle.mitosis and meiosis.meiotic recombination.meiotic crossover.class I interference-sensitive crossover pathway.double Holliday junction resolvir | 1  | 1  | 1  | 1  | 1  | 1.0             |
| 13.3.6.5.2.2.2 | Cell cycle.mitosis and meiosis.meiotic recombination.meiotic crossover.class II interference-insensitive crossover pathway.MUS81-independent pathway      | 1  | 1  | 1  | 1  | 1  | 1.0             |
| 13.3.6.5.4.3   | Cell cycle.mitosis and meiosis.meiotic recombination.meiotic crossover.FANCM-MHF DNA remodeling complex.MHF2 component                                    | 1  | 1  | 1  | 1  | 1  | 1.0             |
| 13.4.1.5       | Cell cycle.cytokinesis.preprophase microtubule organization.SABRE microtubule orientation-stabilizing factor                                              | 1  | 1  | 2  | 2  | 2  | 1.6             |
| 13.4.4.1.1     | Cell cycle.cytokinesis.phragmoplast disassembly.NACK-PQR signalling pathway.NACK microtubule-destabilizing kinesin                                        | 2  | 1  | 3  | 1  | 1  | 1.6             |
| 13.5.2.2.2     | Cell cycle.organelle machineries.organelle fission.plastid division.MinD FtsZ assembly factor                                                             | 1  | 1  | 1  | 1  | 1  | 1.0             |
| 14.5.2.4       | DNA damage response.DNA repair mechanisms.base excision repair (BER).bifunctional DNA glycosylase/lyase (ROS1)                                            | 2  | 3  | 4  | 2  | 2  | 2.6             |
| 14.5.2.10.2    | DNA damage response.DNA repair mechanisms.base excision repair (BER).apurinic/aprimidinic (AP) endonuclease activities.APE2 AP-endonuclease               | 1  | 1  | 1  | 2  | 1  | 1.2             |
| 14.5.5.1.1     | DNA damage response.DNA repair mechanisms.nonhomologous end-joining repair (NHEJ).Ku70-Ku80 helicase complex.Ku70 component                               | 1  | 1  | 1  | 1  | 2  | 1.2             |
| 15.3.2.7.2     | RNA biosynthesis.RNA polymerase II-dependent transcription.pre-initiation complex.TATA box-binding protein (TBP) regulation.TBP-associated factor (M      | 1  | 2  | 1  | 1  | 1  | 1.2             |
| 15.3.6.2.3     | RNA biosynthesis.RNA polymerase II-dependent transcription.MEDIATOR transcription co-activator complex.middle module.MED9 component                       | 2  | 1  | 1  | 2  | 2  | 1.6             |
| 15.3.7.4       | RNA biosynthesis.RNA polymerase II-dependent transcription.ELONGATOR transcription elongation complex.ELP4 component                                      | 1  | 1  | 1  | 1  | 1  | 1.0             |
| 15.4.5.2       | RNA biosynthesis.RNA polymerase III-dependent transcription.TFIIIE transcription factor complex.RPC34 component                                           | 1  | 1  | 2  | 1  | 1  | 1.2             |
| 16.4.2.1       | RNA processing.RNA splicing.U1/U2/U4/U5-associated Sm accessory ribonucleoprotein complex.Sm-B component                                                  | 2  | 1  | 1  | 2  | 2  | 1.6             |



|                  |                                                                                                                                                           |    |   |   |   |   |     |
|------------------|-----------------------------------------------------------------------------------------------------------------------------------------------------------|----|---|---|---|---|-----|
| 16.4.5.2.8       | RNA processing.RNA splicing.spliceosome-associated non-snRNP MOS4-associated complex (MAC).associated components.MOS2 component                           | 2  | 1 | 1 | 1 | 3 | 1.6 |
| 16.4.7.1.1       | RNA processing.RNA splicing.spliceosome assembly/disassembly.RNA helicase activities.Sub2 RNA helicase                                                    | 1  | 2 | 3 | 2 | 3 | 2.2 |
| 16.7.9.1         | RNA processing.RNA modification.mRNA demethylation.ALKBH10 N6-methyladenosine demethylase                                                                 | 2  | 1 | 1 | 2 | 2 | 1.6 |
| 16.8.1.1.4       | RNA processing.RNA decay.exosome complex.EXO9 core complex.RRP43 component                                                                                | 1  | 1 | 1 | 2 | 1 | 1.2 |
| 16.10.1.1.1.5    | RNA processing.organelle machineries.RNA splicing.plastidial RNA splicing.group-II intron splicing.RH3 basal splicing factor                              | 1  | 1 | 1 | 1 | 1 | 1.0 |
| 16.10.1.1.1.6    | RNA processing.organelle machineries.RNA splicing.plastidial RNA splicing.group-II intron splicing.mTERRF4 splicing factor                                | 1  | 1 | 1 | 1 | 1 | 1.0 |
| 16.10.1.2.1.6    | RNA processing.organelle machineries.RNA splicing.mitochondrial RNA splicing.group-II intron splicing.OTP43 splicing factor                               | 1  | 1 | 1 | 1 | 1 | 1.0 |
| 16.10.1.2.2      | RNA processing.organelle machineries.RNA splicing.mitochondrial RNA splicing.RUG3 splicing factor                                                         | 1  | 1 | 1 | 1 | 1 | 1.0 |
| 16.10.3.3.4      | RNA processing.organelle machineries.RNA editing.mitochondrial RNA editing.MEF7 RNA editing factor                                                        | 1  | 1 | 1 | 1 | 1 | 1.0 |
| 16.10.3.3.7      | RNA processing.organelle machineries.RNA editing.mitochondrial RNA editing.MEF10 RNA editing factor                                                       | 1  | 1 | 1 | 1 | 1 | 1.0 |
| 16.10.3.3.8      | RNA processing.organelle machineries.RNA editing.mitochondrial RNA editing.MEF11 RNA editing factor                                                       | 1  | 1 | 1 | 1 | 1 | 1.0 |
| 16.10.3.4.6      | RNA processing.organelle machineries.RNA editing.plastidial RNA editing.CRR21 RNA editing factor                                                          | 1  | 1 | 1 | 1 | 1 | 1.0 |
| 16.10.3.4.12     | RNA processing.organelle machineries.RNA editing.plastidial RNA editing.OTP85 RNA editing factor                                                          | 1  | 1 | 1 | 1 | 1 | 1.0 |
| 17.1.1.1.38      | Protein biosynthesis.cytosolic ribosome.large subunit (LSU).LSU proteome component.RPL36a component                                                       | 2  | 4 | 2 | 2 | 2 | 2.4 |
| 17.1.1.1.48      | Protein biosynthesis.cytosolic ribosome.large subunit (LSU).LSU proteome component.RPP3 component                                                         | 2  | 2 | 1 | 1 | 1 | 1.4 |
| 17.1.1.2.12      | Protein biosynthesis.cytosolic ribosome.large subunit (LSU).LSU processome component.RSA4 assembly factor (NLE)                                           | 1  | 2 | 1 | 1 | 2 | 1.4 |
| 17.1.2.2.21      | Protein biosynthesis.cytosolic ribosome.small subunit (SSU).SSU processome.SWA3/RH36 assembly factor                                                      | 1  | 1 | 1 | 1 | 1 | 1.0 |
| 17.1.2.2.22.3    | Protein biosynthesis.cytosolic ribosome.small subunit (SSU).SSU processome.pre-40S subunit nuclear export.Rio2 kinase                                     | 1  | 1 | 1 | 1 | 1 | 1.0 |
| 17.6.1.2.7       | Protein biosynthesis.organelle translation machineries.mitochondrial ribosome.small subunit proteome.mtRPS9 component                                     | 1  | 1 | 1 | 1 | 1 | 1.0 |
| 17.6.1.2.15      | Protein biosynthesis.organelle translation machineries.mitochondrial ribosome.small subunit proteome.mtRPS17 component                                    | 2  | 1 | 1 | 1 | 1 | 1.2 |
| 17.6.2.1.14      | Protein biosynthesis.organelle translation machineries.plastidial ribosome.large subunit proteome.psRPL16 component                                       | 1  | 1 | 1 | 1 | 1 | 1.0 |
| 17.6.2.1.18      | Protein biosynthesis.organelle translation machineries.plastidial ribosome.large subunit proteome.psRPL20 component                                       | 1  | 3 | 1 | 4 | 1 | 2.0 |
| 17.6.2.1.20      | Protein biosynthesis.organelle translation machineries.plastidial ribosome.large subunit proteome.psRPL22 component                                       | 1  | 4 | 3 | 1 | 1 | 2.0 |
| 17.6.2.1.21      | Protein biosynthesis.organelle translation machineries.plastidial ribosome.large subunit proteome.psRPL23 component                                       | 2  | 7 | 1 | 3 | 2 | 3.0 |
| 17.6.2.1.27      | Protein biosynthesis.organelle translation machineries.plastidial ribosome.large subunit proteome.psRPL32 component                                       | 1  | 1 | 4 | 3 | 2 | 2.2 |
| 17.6.2.1.31      | Protein biosynthesis.organelle translation machineries.plastidial ribosome.large subunit proteome.psRPL36 component                                       | 1  | 1 | 1 | 1 | 1 | 1.0 |
| 17.6.2.2.3       | Protein biosynthesis.organelle translation machineries.plastidial ribosome.small subunit proteome.psRPS3 component                                        | 1  | 5 | 3 | 1 | 1 | 2.2 |
| 17.6.2.2.8       | Protein biosynthesis.organelle translation machineries.plastidial ribosome.small subunit proteome.psRPS8 component                                        | 1  | 4 | 3 | 1 | 1 | 2.0 |
| 17.6.2.2.15      | Protein biosynthesis.organelle translation machineries.plastidial ribosome.small subunit proteome.psRPS15 component                                       | 1  | 4 | 3 | 3 | 1 | 2.4 |
| 17.6.2.2.16      | Protein biosynthesis.organelle translation machineries.plastidial ribosome.small subunit proteome.psRPS16 component                                       | 1  | 1 | 2 | 1 | 1 | 1.2 |
| 17.6.2.2.19      | Protein biosynthesis.organelle translation machineries.plastidial ribosome.small subunit proteome.psRPS19 component                                       | 1  | 1 | 3 | 1 | 1 | 1.4 |
| 18.1.6.2.1       | Protein modification.N-linked glycosylation.complex N-glycan maturation.class-II glucosylase II complex.subunit alpha                                     | 1  | 1 | 1 | 1 | 1 | 1.0 |
| 18.1.6.3         | Protein modification.N-linked glycosylation.complex N-glycan maturation.class-I alpha-mannosidase I                                                       | 2  | 1 | 1 | 2 | 2 | 1.6 |
| 18.2.2.3         | Protein modification.O-linked glycosylation.serine/threonine O-linked glycosylation.OFT1 O-fucosyltransferase                                             | 1  | 1 | 1 | 1 | 1 | 1.0 |
| 18.7.4.1.6       | Protein modification.lipidation.Glycophosphatidylinositol (GPI)-anchor addition.GPI pre-assembly.PIG-N phosphoethanolamine transferase-I                  | 1  | 1 | 1 | 1 | 1 | 1.0 |
| 18.8.1.40        | Protein modification.phosphorylation.TKL kinase superfamily.RLCK-X kinase                                                                                 | 4  | 3 | 3 | 2 | 4 | 3.2 |
| 18.8.5.1.1       | Protein modification.phosphorylation.CAMK kinase superfamily.SNF1-related SnRK1 kinase complex.alpha-type catalytic subunit                               | 3  | 4 | 3 | 2 | 2 | 2.8 |
| 18.8.9           | Protein modification.phosphorylation.BUB kinase                                                                                                           | 1  | 1 | 1 | 1 | 1 | 1.0 |
| 19.4.1.5.4.2.2.5 | Protein degradation.peptide tagging.Ubiquitin (UBQ)-anchor addition (ubiquitylation).UBQ-ligase E3 activities.Cullin-based ubiquitylation complexes.CUL3- | 2  | 1 | 1 | 1 | 1 | 1.2 |
| 19.4.1.5.4.3.1   | Protein degradation.peptide tagging.Ubiquitin (UBQ)-anchor addition (ubiquitylation).UBQ-ligase E3 activities.Cullin-based ubiquitylation complexes.CUL4- | 1  | 1 | 1 | 2 | 2 | 1.4 |
| 19.4.6.3         | Protein degradation.peptide tagging.Ubiquitin-fold-modifier (UFM)-anchor addition.UFM conjugation E2 protein                                              | 1  | 1 | 1 | 1 | 1 | 1.0 |
| 19.5.2.1.3       | Protein degradation.peptidase families.serine-type peptidase activities.subtilisin-type protease families.SBT3 protease                                   | 15 | 2 | 2 | 1 | 2 | 4.4 |
| 19.5.2.5.5       | Protein degradation.peptidase families.serine-type peptidase activities.chloroplast Clp-type protease complex.ClpD chaperone component                    | 1  | 1 | 2 | 1 | 1 | 1.2 |
| 20.1.3.7         | Cytoskeleton.microtubular network.Kinesin microtubule-based motor protein activities.Kinesin-8 motor protein                                              | 2  | 2 | 2 | 2 | 4 | 2.4 |
| 20.2.2.7.2       | Cytoskeleton.microfilament network.actin polymerisation.actin capping protein heterodimer.beta component                                                  | 1  | 1 | 1 | 1 | 2 | 1.2 |
| 21.3.5.1.1       | Cell wall.pectin.modification and degradation.polygalacturonase activities.QRT2 polygalacturonase                                                         | 3  | 3 | 2 | 2 | 3 | 2.6 |
| 21.3.5.1.3       | Cell wall.pectin.modification and degradation.polygalacturonase activities.PGX1 polygalacturonase                                                         | 2  | 1 | 1 | 1 | 2 | 1.4 |
| 21.6.1.1         | Cell wall.lignin.monolignol synthesis.hydroxycinnamoyl-CoA:quininate/shikimate O-hydroxycinnamoyltransferase (HCT)                                        | 1  | 2 | 2 | 1 | 2 | 1.6 |
| 21.6.1.7         | Cell wall.lignin.monolignol synthesis.caffeic acid O-methyltransferase (COMT)                                                                             | 1  | 1 | 1 | 1 | 2 | 1.2 |
| 21.6.2.1         | Cell wall.lignin.monolignol conjugation and polymerization.p-coumaroyl-CoA:monolignol transferase (PMT)                                                   | 1  | 3 | 1 | 1 | 1 | 1.4 |
| 21.9.3.3         | Cell wall.cutin and suberin.biosynthesis regulation.CFL regulator                                                                                         | 2  | 1 | 1 | 1 | 2 | 1.4 |
| 22.1.3.3         | Vesicle trafficking.clathrin coated vesicle (CCV) machinery.AP-2 cargo adaptor complex.AP2M medium mu subunit                                             | 1  | 1 | 1 | 2 | 1 | 1.2 |
| 22.7.7.1.1       | Vesicle trafficking.target membrane tethering.TRAPP (Trafficking-Protein-Particle) complexes.TRAPP-I/II/III complex-shared components.BET5 componen       | 1  | 1 | 1 | 1 | 1 | 1.0 |
| 23.1.3.5         | Protein translocation.chloroplast.inner envelope TIC translocation system.Tic40 component                                                                 | 1  | 1 | 1 | 1 | 1 | 1.0 |
| 23.1.4.3         | Protein translocation.chloroplast.inner envelope Sec2 post-import insertion system.SecE2 component                                                        | 1  | 1 | 1 | 1 | 1 | 1.0 |
| 23.1.5.1         | Protein translocation.chloroplast.thylakoid membrane Sec1 translocation system.SecA1 component                                                            | 1  | 1 | 1 | 1 | 1 | 1.0 |
| 23.2.1.1         | Protein translocation.mitochondrion.outer mitochondrion membrane TOM translocation system.Tom5 component                                                  | 1  | 1 | 2 | 1 | 1 | 1.2 |
| 23.2.1.3         | Protein translocation.mitochondrion.outer mitochondrion membrane TOM translocation system.Tom7 component                                                  | 2  | 1 | 2 | 2 | 2 | 1.8 |
| 23.2.1.5         | Protein translocation.mitochondrion.outer mitochondrion membrane TOM translocation system.Tom20 component                                                 | 4  | 1 | 1 | 2 | 4 | 2.4 |
| 23.2.1.7         | Protein translocation.mitochondrion.outer mitochondrion membrane TOM translocation system.OM64 component                                                  | 1  | 1 | 1 | 1 | 1 | 1.0 |
| 23.3.2.3.1       | Protein translocation.endoplasmic reticulum.GET post-translational insertion system.GET4-GET5 scaffold subcomplex.GET4 GET3-recruitment componer          | 1  | 1 | 1 | 2 | 1 | 1.2 |
| 23.5.1.1.6.3     | Protein translocation.nucleus.nucleocytoplasmic transport.nuclear pore complex (NPC).central subcomplex.NUP58 nucleoporin                                 | 1  | 2 | 2 | 1 | 1 | 1.4 |
| 24.2.1.7         | Solute transport.carrier-mediated transport.DMT superfamily.TPPT-type solute transporter                                                                  | 4  | 5 | 4 | 3 | 2 | 3.6 |
| 24.2.9.2.1       | Solute transport.carrier-mediated transport.CDF superfamily.CDF family.iron/zinc cation transporter (Fe/Zn-CDF-type)                                      | 1  | 1 | 1 | 2 | 1 | 1.2 |
| 25.5.2.3         | Nutrient uptake.copper uptake.reduction-based uptake.CCH copper chaperone                                                                                 | 2  | 2 | 2 | 2 | 1 | 1.8 |
| 26.1.2.2.3       | External stimuli response.light.UV-A/blue light.phototropin-mediated photoperception.PKS phototropin signalling factor                                    | 4  | 3 | 3 | 3 | 6 | 3.8 |
| 26.2.1.5         | External stimuli response.gravity.sensing and signalling.SCR transcription factor                                                                         | 1  | 2 | 1 | 1 | 2 | 1.4 |
| 26.3.2.5.3       | External stimuli response.temperature.Hsp (heat-shock-responsive protein) families.sHsp (small heat-shock-responsive protein) families.class-C-III prote  | 1  | 1 | 1 | 1 | 1 | 1.0 |
| 26.3.2.5.10      | External stimuli response.temperature.Hsp (heat-shock-responsive protein) families.sHsp (small heat-shock-responsive protein) families.class-PX protei    | 1  | 1 | 1 | 1 | 1 | 1.0 |
| 26.5.1.1.1       | External stimuli response.salinity.SOS (Salt Overly Sensitive) signalling pathway.SOS3-SOS2 signalling.SOS3 calcium sensor component                      | 1  | 2 | 1 | 3 | 3 | 2.0 |
| 26.6.2.2.1.2     | External stimuli response.biotic stress.pathogen effector.ETI (effector-triggered immunity) network.RIN4-RPM1 immune signalling.RIPK RIN4-protein kina    | 2  | 1 | 1 | 3 | 5 | 2.4 |
| 26.6.4.4         | External stimuli response.biotic stress.systemic acquired resistance (SAR).FMO1 pipecolate N-hydroxylase                                                  | 1  | 1 | 1 | 1 | 2 | 1.2 |
| 26.6.5.2         | External stimuli response.biotic stress.tobamovirus multiplication.TOM2A replication host factor                                                          | 1  | 1 | 1 | 1 | 1 | 1.0 |
| 26.6.6.1.6.1     | External stimuli response.biotic stress.symbiont-associated response.symbiosis signalling pathway.NSP1-NSP2 nodulation initiation complex.NSP1 com        | 1  | 1 | 1 | 2 | 2 | 1.4 |
| 26.6.6.1.6.2     | External stimuli response.biotic stress.symbiont-associated response.symbiosis signalling pathway.NSP1-NSP2 nodulation initiation complex.NSP2 com        | 1  | 1 | 1 | 1 | 2 | 1.2 |
| 27.1.4.4         | Multi-process regulation.circadian clock.morning element regulation.TZP repression factor                                                                 | 1  | 1 | 1 | 1 | 2 | 1.2 |
| 27.1.6           | Multi-process regulation.circadian clock.TIC circadian clock regulator                                                                                    | 2  | 1 | 1 | 1 | 2 | 1.4 |
| 27.3.1.1         | Multi-process regulation.SnRK1 metabolic regulator system.SnRK1 kinase complex.alpha catalytic subunit                                                    | 3  | 4 | 3 | 2 | 2 | 2.8 |

Table 11: Comparison of over- and under-represented MapMan4 second-order functional classifications for EL10.1 and four other Tracheophytes

| Bincode | Top level bin             | Second level bin                              | gene count |     |     |      |      | Angiosperm  |         | EL10 mean / Angiosperm mean (%) |         | 'under-represented' | 'over-represented' |
|---------|---------------------------|-----------------------------------------------|------------|-----|-----|------|------|-------------|---------|---------------------------------|---------|---------------------|--------------------|
|         |                           |                                               | At         | Os  | Bd  | Sl   | Me   | Mean        | std dev | EL10 mean                       | std dev |                     |                    |
| 2.2     | Cellular respiration      | pyruvate oxidation                            | 1.8        | 2.4 | 2.2 | 2.0  | 1.8  | <b>2.04</b> | 0.68    | <b>1.20</b>                     | 0.45    | 58.8                | -                  |
| 3.3     | Carbohydrate metabolism   | trehalose metabolism                          | 5.0        | 4.7 | 4.0 | 3.3  | 4.7  | <b>4.33</b> | 4.08    | <b>2.33</b>                     | 2.31    | 53.8                | -                  |
| 3.4     | Carbohydrate metabolism   | raffinose family oligosaccharide biosynthesis | 3.3        | 1.0 | 1.3 | 2.7  | 4.0  | <b>2.47</b> | 2.47    | <b>2.33</b>                     | 0.58    | -                   | 94.6               |
| 3.8     | Carbohydrate metabolism   | nucleotide sugar biosynthesis                 | 2.7        | 2.3 | 2.1 | 3.3  | 2.8  | <b>2.65</b> | 1.97    | <b>1.46</b>                     | 0.93    | 55.0                | -                  |
| 3.9     | Carbohydrate metabolism   | fermentation                                  | 2.0        | 3.3 | 2.3 | 2.7  | 4.3  | <b>2.93</b> | 1.58    | <b>1.67</b>                     | 0.58    | 56.8                | -                  |
| 5.9     | Lipid metabolism          | lipid bodies-associated activities            | 6.7        | 4.7 | 5.0 | 4.5  | 5.2  | <b>5.20</b> | 3.56    | <b>3.00</b>                     | 1.79    | 57.7                | -                  |
| 7.10    | Coenzyme metabolism       | FMN/FAD biosynthesis                          | 1.1        | 1.3 | 1.5 | 1.3  | 1.2  | <b>1.27</b> | 0.56    | <b>1.18</b>                     | 0.40    | -                   | 92.9               |
| 7.1     | Coenzyme metabolism       | molybdenum cofactor synthesis                 | 1.0        | 1.1 | 1.0 | 1.0  | 1.0  | <b>1.03</b> | 0.17    | <b>1.00</b>                     | 0.00    | -                   | 97.2               |
| 7.11    | Coenzyme metabolism       | iron-sulfur cluster assembly machineries      | 1.5        | 1.4 | 1.5 | 1.5  | 1.4  | <b>1.43</b> | 0.78    | <b>1.35</b>                     | 0.98    | -                   | 95.0               |
| 7.13    | Coenzyme metabolism       | phyloquinone synthesis                        | 1.3        | 0.9 | 1.4 | 1.3  | 1.3  | <b>1.20</b> | 0.61    | <b>1.13</b>                     | 0.35    | -                   | 93.8               |
| 7.14    | Coenzyme metabolism       | lipoic acid synthesis                         | 2.0        | 1.5 | 2.5 | 2.0  | 1.5  | <b>1.90</b> | 1.10    | <b>1.00</b>                     | 0.00    | 52.6                | -                  |
| 7.3     | Coenzyme metabolism       | S-adenosyl methionine (SAM) cycle             | 3.0        | 3.0 | 2.0 | 3.5  | 4.0  | <b>3.10</b> | 1.66    | <b>1.50</b>                     | 0.71    | 48.4                | -                  |
| 7.5     | Coenzyme metabolism       | tetrahydrofolate synthesis                    | 1.8        | 1.4 | 1.4 | 1.6  | 1.9  | <b>1.61</b> | 1.03    | <b>1.86</b>                     | 1.61    | -                   | 115.0              |
| 7.6     | Coenzyme metabolism       | biotin synthesis                              | 1.3        | 1.3 | 1.3 | 1.0  | 1.0  | <b>1.15</b> | 0.37    | <b>1.25</b>                     | 0.50    | -                   | 108.7              |
| 9.1     | Secondary metabolism      | terpenoids                                    | 2.9        | 2.8 | 2.2 | 3.1  | 3.4  | <b>2.87</b> | 5.17    | <b>1.68</b>                     | 2.41    | 58.6                | -                  |
| 9.3     | Secondary metabolism      | nitrogen-containing secondary compounds       | 2.3        | 0.7 | 0.9 | 0.6  | 0.7  | <b>1.01</b> | 1.66    | <b>0.59</b>                     | 1.18    | 58.2                | -                  |
| 10.4    | Redox homeostasis         | hydrogen peroxide removal                     | 4.9        | 4.7 | 4.1 | 4.9  | 4.7  | <b>4.66</b> | 2.81    | <b>4.29</b>                     | 3.55    | -                   | 92.0               |
| 10.5    | Redox homeostasis         | chloroplast redox homeostasis                 | 2.2        | 2.0 | 1.9 | 2.5  | 2.5  | <b>2.22</b> | 1.62    | <b>1.27</b>                     | 0.90    | 57.4                | -                  |
| 11.1    | Phytohormones             | signalling peptides                           | 8.4        | 6.2 | 6.4 | 6.4  | 10.8 | <b>7.65</b> | 8.33    | <b>3.23</b>                     | 4.08    | 42.3                | -                  |
| 11.5    | Phytohormones             | ethylene                                      | 3.8        | 4.1 | 3.7 | 5.1  | 4.3  | <b>4.20</b> | 2.73    | <b>2.44</b>                     | 1.59    | 58.2                | -                  |
| 11.6    | Phytohormones             | gibberellin                                   | 2.6        | 3.2 | 3.2 | 3.2  | 5.5  | <b>3.55</b> | 2.98    | <b>1.69</b>                     | 1.03    | 47.6                | -                  |
| 11.6    | Phytohormones             | jasmonic acid                                 | 2.0        | 1.9 | 1.9 | 2.8  | 2.7  | <b>2.27</b> | 1.68    | <b>1.14</b>                     | 0.77    | 50.3                | -                  |
| 11.8    | Phytohormones             | salicylic acid                                | 1.7        | 0.7 | 0.7 | 0.9  | 1.4  | <b>1.09</b> | 0.92    | <b>0.29</b>                     | 0.49    | 26.3                | -                  |
| 14.1    | DNA damage response       | DNA damage sensing and signalling             | 1.0        | 1.0 | 1.0 | 1.3  | 1.8  | <b>1.20</b> | 0.70    | <b>1.25</b>                     | 0.50    | -                   | 104.2              |
| 14.4    | DNA damage response       | DNA repair polymerase activities              | 1.0        | 0.7 | 1.0 | 1.0  | 1.0  | <b>0.94</b> | 0.24    | <b>1.00</b>                     | 0.58    | -                   | 106.1              |
| 14.5    | DNA damage response       | DNA repair mechanisms                         | 1.2        | 1.2 | 1.3 | 1.2  | 1.2  | <b>1.23</b> | 0.58    | <b>1.16</b>                     | 0.93    | -                   | 94.2               |
| 15.2    | RNA biosynthesis          | RNA polymerase I-dependent transcription      | 1.4        | 1.4 | 1.1 | 1.6  | 1.6  | <b>1.43</b> | 0.61    | <b>1.71</b>                     | 0.95    | -                   | 120.0              |
| 15.4    | RNA biosynthesis          | RNA polymerase III-dependent transcription    | 1.9        | 1.6 | 1.9 | 1.2  | 1.2  | <b>1.56</b> | 0.88    | <b>1.50</b>                     | 1.40    | -                   | 96.3               |
| 15.5    | RNA biosynthesis          | siRNA biogenesis                              | 1.9        | 1.8 | 2.2 | 3.1  | 1.8  | <b>2.16</b> | 2.03    | <b>2.00</b>                     | 1.63    | -                   | 92.6               |
| 15.6    | RNA biosynthesis          | rRNA biogenesis                               | 1.3        | 1.3 | 1.3 | 1.0  | 1.3  | <b>1.20</b> | 0.41    | <b>1.25</b>                     | 0.50    | -                   | 104.2              |
| 15.8    | RNA biosynthesis          | transcriptional repression                    | 4.5        | 4.8 | 5.0 | 10.5 | 8.5  | <b>6.65</b> | 4.17    | <b>2.75</b>                     | 1.26    | 41.4                | -                  |
| 16.5    | RNA processing            | ribonuclease activities                       | 1.9        | 2.3 | 2.2 | 2.4  | 2.2  | <b>2.22</b> | 1.52    | <b>2.00</b>                     | 1.32    | -                   | 90.0               |
| 16.6    | RNA processing            | RNA editing                                   | 1.0        | 1.0 | 1.5 | 1.0  | 1.0  | <b>1.10</b> | 0.32    | <b>2.00</b>                     | 0.94    | -                   | 181.8              |
| 17.2    | Protein biosynthesis      | aminoacyl-tRNA synthetase activities          | 2.2        | 2.5 | 2.3 | 2.0  | 2.2  | <b>2.25</b> | 1.10    | <b>2.12</b>                     | 1.13    | -                   | 94.3               |
| 18.1    | Protein modification      | N-linked glycosylation                        | 1.4        | 1.3 | 1.3 | 1.3  | 1.6  | <b>1.39</b> | 0.90    | <b>1.33</b>                     | 0.77    | -                   | 95.9               |
| 18.14   | Protein modification      | peptide maturation                            | 1.9        | 2.0 | 2.0 | 1.7  | 2.2  | <b>1.93</b> | 1.45    | <b>1.75</b>                     | 1.48    | -                   | 90.5               |
| 18.4    | Protein modification      | disulfide bond formation                      | 1.3        | 1.1 | 1.2 | 1.2  | 1.2  | <b>1.22</b> | 0.42    | <b>1.11</b>                     | 0.33    | -                   | 90.9               |
| 18.5    | Protein modification      | ADP-ribosylation                              | 2.5        | 2.0 | 2.5 | 3.5  | 2.5  | <b>2.60</b> | 1.26    | <b>4.00</b>                     | 1.41    | -                   | 153.8              |
| 18.9    | Protein modification      | tyrosine sulfation (only 1 entry)             | 1.0        | 1.0 | 1.0 | 1.0  | 1.0  | <b>1.00</b> | 0.00    | <b>1.00</b>                     | NA      | -                   | 100.0              |
| 20.3    | Cytoskeleton              | actin and tubulin folding                     | 1.1        | 1.2 | 1.2 | 1.2  | 1.5  | <b>1.21</b> | 0.41    | <b>1.10</b>                     | 0.31    | -                   | 90.9               |
| 21.2    | Cell wall                 | hemicellulose                                 | 3.2        | 4.5 | 3.9 | 3.0  | 3.7  | <b>3.65</b> | 3.32    | <b>2.04</b>                     | 1.86    | 55.8                | -                  |
| 21.4    | Cell wall                 | cell wall proteins                            | 7.8        | 7.5 | 7.1 | 6.1  | 8.2  | <b>7.33</b> | 8.57    | <b>4.28</b>                     | 4.11    | 58.3                | -                  |
| 21.6    | Cell wall                 | lignin                                        | 2.8        | 3.3 | 3.2 | 3.5  | 3.6  | <b>3.29</b> | 3.15    | <b>1.77</b>                     | 1.92    | 53.7                | -                  |
| 21.9    | Cell wall                 | cutin and suberin                             | 3.3        | 2.2 | 2.3 | 2.7  | 3.2  | <b>2.71</b> | 2.26    | <b>1.57</b>                     | 1.34    | 57.7                | -                  |
| 26.4    | External stimuli response | drought                                       | 1.0        | 1.0 | 1.0 | 1.0  | 1.5  | <b>1.10</b> | 0.32    | <b>1.00</b>                     | 0.00    | -                   | 90.9               |
| 26.6    | External stimuli response | biotic stress                                 | 3.8        | 1.6 | 1.6 | 2.7  | 3.6  | <b>2.66</b> | 8.73    | <b>1.09</b>                     | 1.16    | 41.1                | -                  |
| 27.2    | Multi-process regulation  | TOR signalling pathway                        | 2.3        | 1.5 | 1.5 | 1.8  | 2.3  | <b>1.85</b> | 1.04    | <b>1.75</b>                     | 0.50    | -                   | 94.6               |
| 27.3    | Multi-process regulation  | SnRK1 metabolic regulator system              | 4.8        | 7.3 | 6.7 | 4.8  | 6.2  | <b>5.97</b> | 7.69    | <b>2.50</b>                     | 2.51    | 41.9                | -                  |
| 50.5    | Enzyme classification     | EC_5 isomerases                               | 3.3        | 3.0 | 2.8 | 3.8  | 3.3  | <b>3.20</b> | 3.04    | <b>3.50</b>                     | 4.12    | -                   | 109.4              |
| 50.6    | Enzyme classification     | EC_6 ligases                                  | 1.8        | 2.4 | 2.0 | 1.6  | 1.6  | <b>1.88</b> | 2.98    | <b>1.80</b>                     | 2.49    | -                   | 95.7               |

Table 12: Comparison of Transcription factor classes for EL10.1 and four other Tracheophytes

| Bincode   | Description                                                | gene count |           |           |           |           | Angiosperm   |       | EL10       | Difference |
|-----------|------------------------------------------------------------|------------|-----------|-----------|-----------|-----------|--------------|-------|------------|------------|
|           |                                                            | <i>At</i>  | <i>Os</i> | <i>Bd</i> | <i>Sl</i> | <i>Me</i> | mean         | stdev |            |            |
| 15.7.49   | FAR1 transcription factor                                  | 18         | 89        | 142       | 44        | 36        | <b>77.8</b>  | 48.8  | <b>106</b> | 28.25      |
| 15.7.3.7  | HB (Homeobox) superfamily.HOX-like transcription factor    | 3          | 2         | 2         | 4         | 4         | <b>3.0</b>   | 1.2   | <b>6</b>   | 3.00       |
| 15.7.27   | ELF3 transcription factor                                  | 2          | 2         | 1         | 4         | 2         | <b>2.3</b>   | 1.3   | <b>3</b>   | 0.75       |
| 15.7.4.3  | bZIP superfamily.bZIP19/23/24 transcription factor         | 3          | 3         | 4         | 2         | 2         | <b>2.8</b>   | 1.0   | <b>3</b>   | 0.25       |
| 15.7.3.10 | HB (Homeobox) superfamily.SAWADEE transcription factor     | 2          | 3         | 2         | 4         | 3         | <b>3.0</b>   | 0.8   | <b>3</b>   | 0.00       |
| 15.7.45   | HRT transcription factor                                   | 3          | 1         | 1         | 1         | 1         | <b>1.0</b>   | 0.0   | <b>1</b>   | 0.00       |
| 15.7.5.4  | B3 superfamily.LAV-VAL transcription factor                | 3          | 2         | 2         | 4         | 4         | <b>3.0</b>   | 1.2   | <b>3</b>   | 0.00       |
| 15.7.51   | SAP transcription factor                                   | 1          | 0         | 0         | 2         | 2         | <b>1.0</b>   | 1.2   | <b>1</b>   | 0.00       |
| 15.7.53   | DPB3 transcription factor                                  | 2          | 2         | 2         | 2         | 2         | <b>2.0</b>   | 0.0   | <b>2</b>   | 0.00       |
| 15.7.13   | HSF (heat shock) transcription factor                      | 24         | 25        | 24        | 27        | 32        | <b>27.0</b>  | 3.6   | <b>16</b>  | -11.00     |
| 15.7.46   | PLATZ transcription factor                                 | 12         | 16        | 15        | 25        | 21        | <b>19.3</b>  | 4.6   | <b>8</b>   | -11.25     |
| 15.7.5.1  | B3 superfamily.ARF transcription factor                    | 23         | 24        | 24        | 25        | 29        | <b>25.5</b>  | 2.4   | <b>14</b>  | -11.50     |
| 15.7.3.13 | HB (Homeobox) superfamily.zf-HD transcription factor       | 17         | 14        | 21        | 37        | 22        | <b>23.5</b>  | 9.7   | <b>11</b>  | -12.50     |
| 15.7.7.3  | AP2/ERF superfamily.AP2-type transcription factor          | 18         | 22        | 24        | 24        | 30        | <b>25.0</b>  | 3.5   | <b>12</b>  | -13.00     |
| 15.7.16   | C3H zinc finger transcription factor                       | 57         | 52        | 49        | 76        | 68        | <b>61.3</b>  | 12.9  | <b>48</b>  | -13.25     |
| 15.7.19   | TCP transcription factor                                   | 24         | 20        | 21        | 38        | 35        | <b>28.5</b>  | 9.3   | <b>14</b>  | -14.50     |
| 15.7.1.5  | C2C2 superfamily.DOF transcription factor                  | 36         | 30        | 29        | 36        | 44        | <b>34.8</b>  | 6.9   | <b>20</b>  | -14.75     |
| 15.7.1.3  | C2C2 superfamily.GATA transcription factor                 | 30         | 25        | 27        | 33        | 35        | <b>30.0</b>  | 4.8   | <b>15</b>  | -15.00     |
| 15.7.3.3  | HB (Homeobox) superfamily.HD-ZIP IV transcription factor   | 18         | 12        | 17        | 49        | 13        | <b>22.8</b>  | 17.6  | <b>6</b>   | -16.75     |
| 15.7.39   | OFP transcription factor                                   | 18         | 31        | 32        | 25        | 23        | <b>27.8</b>  | 4.4   | <b>11</b>  | -16.75     |
| 15.7.24   | AS2/LOB transcription factor                               | 43         | 36        | 28        | 52        | 56        | <b>43.0</b>  | 13.2  | <b>26</b>  | -17.00     |
| 15.7.7.2  | AP2/ERF superfamily.DREB-type transcription factor         | 53         | 35        | 37        | 45        | 54        | <b>42.8</b>  | 8.7   | <b>25</b>  | -17.75     |
| 15.7.3.1  | HB (Homeobox) superfamily.HD-ZIP I/II transcription factor | 27         | 27        | 24        | 36        | 38        | <b>31.3</b>  | 6.8   | <b>13</b>  | -18.25     |
| 15.7.2.2  | MYB superfamily.MYB-related transcription factor           | 81         | 72        | 64        | 81        | 85        | <b>75.5</b>  | 9.4   | <b>55</b>  | -20.50     |
| 15.7.2.3  | MYB superfamily.G2-like GARP transcription factor          | 36         | 37        | 38        | 38        | 51        | <b>41.0</b>  | 6.7   | <b>18</b>  | -23.00     |
| 15.7.7.1  | AP2/ERF superfamily.ERF-type transcription factor          | 63         | 60        | 52        | 87        | 97        | <b>74.0</b>  | 21.4  | <b>38</b>  | -36.00     |
| 15.7.12   | GRAS transcription factor                                  | 34         | 57        | 63        | 53        | 78        | <b>62.8</b>  | 11.0  | <b>26</b>  | -36.75     |
| 15.7.4.1  | bZIP superfamily.bZIP transcription factor                 | 76         | 96        | 87        | 75        | 81        | <b>84.8</b>  | 9.0   | <b>46</b>  | -38.75     |
| 15.7.22   | WRKY transcription factor                                  | 72         | 100       | 88        | 82        | 101       | <b>92.8</b>  | 9.3   | <b>45</b>  | -47.75     |
| 15.7.15   | C2H2 zinc finger transcription factor                      | 106        | 119       | 107       | 108       | 158       | <b>123.0</b> | 24.0  | <b>75</b>  | -48.00     |
| 15.7.14   | MADS box transcription factor                              | 109        | 75        | 79        | 146       | 82        | <b>95.5</b>  | 33.8  | <b>43</b>  | -52.50     |
| 15.7.17   | NAC transcription factor                                   | 113        | 136       | 135       | 102       | 111       | <b>121.0</b> | 17.1  | <b>61</b>  | -60.00     |
| 15.7.2.1  | MYB superfamily.MYB transcription factor                   | 135        | 118       | 121       | 139       | 176       | <b>138.5</b> | 26.7  | <b>71</b>  | -67.50     |
| 15.7.33   | bHLH transcription factor                                  | 172        | 178       | 162       | 175       | 207       | <b>180.5</b> | 19.0  | <b>113</b> | -67.50     |
|           | mean of 91 classes                                         | 21.5       | 21.4      | 21.4      | 23.8      | 25.6      | 23.1         | 5.2   | 13.7       | -9.4       |
|           | stdev of 91 classes                                        | 32.0       | 33.1      | 33.0      | 33.9      | 38.1      | 33.7         | 7.8   | 21.3       | 15.6       |

Table 13: Beet genome size estimates obtained by flow cytometry.

| Sample                                         | Individual      | Type               | Replicates | Genome size (Mb.1C) |              |               |               |             |
|------------------------------------------------|-----------------|--------------------|------------|---------------------|--------------|---------------|---------------|-------------|
|                                                |                 |                    |            | Mean                | Std Dev      | Median        | Range         | CV          |
| "5B" sugar breeding population                 | 1               | out crossed        | 4          | 749.92              | 5.35         | 750.83        | 12.38         | 0.71        |
| "5B" sugar breeding population                 | 2               | out crossed        | 4          | 760.80              | 8.23         | 763.36        | 18.82         | 1.08        |
| "5B" sugar breeding population                 | 3               | out crossed        | 4          | 727.35              | 13.40        | 729.47        | 28.81         | 1.84        |
| "5B" sugar breeding population                 | 4               | out crossed        | 4          | 750.63              | 7.87         | 752.97        | 17.54         | 1.05        |
| <b>"5B" sugar breeding population combined</b> | <b>combined</b> | <b>out crossed</b> | <b>16</b>  | <b>747.17</b>       | <b>15.07</b> | <b>749.91</b> | <b>56.83</b>  | <b>2.02</b> |
| Sugar beet F1042                               | 1               | out crossed        | 4          | 745.39              | 7.85         | 747.40        | 17.79         | 1.05        |
| Sugar beet F1042                               | 2               | out crossed        | 4          | 794.33              | 11.71        | 799.64        | 24.46         | 1.47        |
| Sugar beet F1042                               | 3               | out crossed        | 4          | 790.83              | 5.98         | 788.76        | 13.24         | 0.76        |
| Sugar beet F1042                               | 4               | out crossed        | 4          | 800.38              | 21.15        | 799.68        | 50.00         | 2.64        |
| <b>Sugar beet F1042 combined</b>               | <b>combined</b> | <b>out crossed</b> | <b>16</b>  | <b>782.73</b>       | <b>25.39</b> | <b>788.76</b> | <b>91.59</b>  | <b>3.24</b> |
| EL10 sugar beet selfed progeny                 | 1               | inbred             | 4          | 648.38              | 29.18        | 655.63        | 64.59         | 4.50        |
| EL10 sugar beet selfed progeny                 | 2               | inbred             | 4          | 683.63              | 9.26         | 683.94        | 18.91         | 1.35        |
| EL10 sugar beet selfed progeny                 | 3               | inbred             | 4          | 689.56              | 4.82         | 690.80        | 11.27         | 0.70        |
| EL10 sugar beet selfed progeny                 | 4               | inbred             | 4          | 696.15              | 6.04         | 697.35        | 13.55         | 0.87        |
| EL10 sugar beet selfed progeny                 | 5               | inbred             | 4          | 700.22              | 1.62         | 699.83        | 3.78          | 0.23        |
| EL10 sugar beet selfed progeny                 | 6               | inbred             | 4          | 721.03              | 14.05        | 725.69        | 31.33         | 1.95        |
| EL10 sugar beet selfed progeny                 | 7               | inbred             | 4          | 738.38              | 6.67         | 737.64        | 14.64         | 0.90        |
| EL10 sugar beet selfed progeny                 | 8               | inbred             | 4          | 739.62              | 57.81        | 748.17        | 135.17        | 7.82        |
| EL10 sugar beet selfed progeny                 | 9               | inbred             | 4          | 760.37              | 18.00        | 763.75        | 41.94         | 2.37        |
| EL10 sugar beet selfed progeny                 | 10              | inbred             | 4          | 811.07              | 20.86        | 812.56        | 50.83         | 2.57        |
| EL10 sugar beet selfed progeny                 | 11              | inbred             | 4          | 758.57              | 10.29        | 760.44        | 23.13         | 1.36        |
| EL10 sugar beet selfed progeny                 | 12              | inbred             | 4          | 761.82              | 4.04         | 761.24        | 9.39          | 0.53        |
| EL10 sugar beet selfed progeny                 | 13              | inbred             | 4          | 742.38              | 10.34        | 745.67        | 23.53         | 1.39        |
| EL10 sugar beet selfed progeny                 | 14              | inbred             | 4          | 751.87              | 10.14        | 753.90        | 20.80         | 1.35        |
| EL10 sugar beet selfed progeny                 | 15              | inbred             | 4          | 755.48              | 5.36         | 755.22        | 10.66         | 0.71        |
| EL10 sugar beet selfed progeny                 | 16              | inbred             | 4          | 749.47              | 13.08        | 748.63        | 31.76         | 1.75        |
| EL10 sugar beet selfed progeny                 | 17              | inbred             | 4          | 633.04              | 10.47        | 634.16        | 25.46         | 1.65        |
| EL10 sugar beet selfed progeny                 | 18              | inbred             | 4          | 640.26              | 5.33         | 640.76        | 12.19         | 0.83        |
| EL10 sugar beet selfed progeny                 | 19              | inbred             | 4          | 741.55              | 5.39         | 742.21        | 12.08         | 0.73        |
| EL10 sugar beet selfed progeny                 | 20              | inbred             | 4          | 738.27              | 3.12         | 739.22        | 7.14          | 0.42        |
| EL10 sugar beet selfed progeny                 | 21              | inbred             | 4          | 633.67              | 40.08        | 640.45        | 95.55         | 6.33        |
| EL10 sugar beet selfed progeny                 | 22              | inbred             | 4          | 656.84              | 31.56        | 665.09        | 72.46         | 4.81        |
| <b>EL10 sugar beet selfed progeny combined</b> | <b>combined</b> | <b>inbred</b>      | <b>88</b>  | <b>715.98</b>       | <b>51.71</b> | <b>732.89</b> | <b>255.88</b> | <b>7.22</b> |
| <b>Sugar beet combined</b>                     | <b>combined</b> | <b>combined</b>    | <b>120</b> | <b>729.04</b>       | <b>51.21</b> | <b>741.00</b> | <b>255.88</b> | <b>7.02</b> |
| W357B table beet selfed progeny                | 1               | inbred             | 4          | 875.51              | 14.94        | 877.06        | 35.37         | 1.71        |
| W357B table beet selfed progeny                | 2               | inbred             | 4          | 801.81              | 19.32        | 804.73        | 46.61         | 2.41        |
| W357B table beet selfed progeny                | 3               | inbred             | 4          | 679.18              | 22.38        | 677.74        | 51.52         | 3.29        |
| W357B table beet selfed progeny                | 4               | inbred             | 4          | 696.88              | 12.58        | 698.39        | 29.43         | 1.80        |
| W357B table beet selfed progeny                | 5               | inbred             | 4          | 731.51              | 10.82        | 732.63        | 25.64         | 1.48        |
| W357B table beet selfed progeny                | 6               | inbred             | 4          | 738.44              | 9.66         | 737.94        | 20.08         | 1.31        |
| W357B table beet selfed progeny                | 7               | inbred             | 4          | 748.06              | 17.36        | 747.85        | 42.52         | 2.32        |
| W357B table beet selfed progeny                | 8               | inbred             | 4          | 756.51              | 19.60        | 759.35        | 47.33         | 2.59        |
| W357B table beet selfed progeny                | 9               | inbred             | 4          | 761.98              | 13.85        | 766.23        | 30.31         | 1.82        |
| W357B table beet selfed progeny                | 10              | inbred             | 4          | 780.58              | 13.66        | 785.08        | 30.69         | 1.75        |
| W357B table beet selfed progeny                | 11              | inbred             | 4          | 700.88              | 22.90        | 708.29        | 51.95         | 3.27        |
| W357B table beet selfed progeny                | 12              | inbred             | 4          | 783.55              | 26.24        | 776.21        | 59.04         | 3.35        |
| W357B table beet selfed progeny                | 13              | inbred             | 4          | 779.73              | 24.70        | 774.50        | 57.85         | 3.17        |
| W357B table beet selfed progeny                | 14              | inbred             | 4          | 767.52              | 19.22        | 764.14        | 42.75         | 2.50        |
| W357B table beet selfed progeny                | 15              | inbred             | 4          | 725.14              | 4.06         | 725.07        | 7.55          | 0.56        |
| W357B table beet selfed progeny                | 16              | inbred             | 4          | 758.03              | 14.64        | 753.73        | 33.60         | 1.93        |
| W357B table beet selfed progeny                | 17              | inbred             | 4          | 748.50              | 5.19         | 748.19        | 12.53         | 0.69        |
| W357B table beet selfed progeny                | 18              | inbred             | 4          | 679.69              | 9.91         | 677.85        | 23.71         | 1.46        |
| W357B table beet selfed progeny                | 19              | inbred             | 4          | 669.48              | 8.51         | 672.18        | 19.08         | 1.27        |
| W357B table beet selfed progeny                | 20              | inbred             | 4          | 662.36              | 10.75        | 662.23        | 22.59         | 1.62        |
| <b>Table beet combined</b>                     | <b>combined</b> | <b>inbred</b>      | <b>80</b>  | <b>742.27</b>       | <b>52.84</b> | <b>746.38</b> | <b>240.45</b> | <b>7.12</b> |
| <b>Inbred combined</b>                         | <b>combined</b> | <b>inbred</b>      | <b>168</b> | <b>728.50</b>       | <b>53.73</b> | <b>737.55</b> | <b>312.53</b> | <b>7.38</b> |
| <b>Out crossed combined</b>                    | <b>combined</b> | <b>out crossed</b> | <b>32</b>  | <b>764.95</b>       | <b>27.35</b> | <b>756.15</b> | <b>115.25</b> | <b>3.58</b> |
| <b>Grand Total combined</b>                    | <b>combined</b> | <b>combined</b>    | <b>200</b> | <b>734.33</b>       | <b>52.14</b> | <b>743.68</b> | <b>312.53</b> | <b>7.10</b> |

Table 14: Frequency of Transposable Element (TE) classes in the EL10.1 genome

**A: RepeatMasker TE's**

| Repeat Class | TE Type        | Number in EL10.1 |
|--------------|----------------|------------------|
| DNA          | TcMar-Stowaway | 48,575           |
| DNA          | En-Spm         | 23,710           |
| DNA          | hAT-Tip100     | 17,754           |
| DNA          | MULE-MuDR      | 6,473            |
| DNA          | PIF-Harbinger  | 3,878            |
| DNA          | TcMar-Mogwai   | 358              |
| DNA          | MuDR           | 87               |
| DNA          | Maverick       | 46               |
| LINE         | L1             | 2,380            |
| LINE         | RTE-BovB       | 1,830            |
| LINE         | L2             | 968              |
| LINE         | DRE            | 5                |
| LTR          | Gypsy          | 34,588           |
| LTR          | Copia          | 17,342           |
| LTR          | undefined      | 1,657            |
| LTR          | Caulimovirus   | 924              |
| LTR          | ERV1           | 78               |
| LTR          | Ngaro          | 78               |
| LTR          | Pao            | 35               |
| MITEs        | -              | 4,481            |
| RC           | Helitron       | 3,869            |
| rRNA         | -              | 51               |
| Satellite    | -              | 5,587            |
| Simple       | -              | 2,227            |
| SINE         | tRNA           | 2,971            |
| SINE         | 7SL            | 679              |
|              | sum            | 180,631          |
|              | mean           | 6,947            |
|              | stdev          | 12,050           |

**B: Complete LTRs (LTR\_Retriever)**

| Repeat Class | TE Type | Number in EL10.1 |
|--------------|---------|------------------|
| LTR          | unknown | 999              |
| LTR          | Gypsy   | 1,030            |
| LTR          | Copia   | 574              |

**C: Major interstitial satellite sequences**

| Repeat Class | Name     | Number in EL10.1 |
|--------------|----------|------------------|
| Gypsy CenH3  | Beetle7  | 1,937            |
| CenH3        | pBV_I    | 4,029            |
| CenH3        | pBV_II   | 3,863            |
| CenH3        | pBV_III  | 4,387            |
| CenH3        | pBV_IV   | 3,854            |
| CenH3        | pBV_V    | 5,206            |
| CenH3        | pBV_VI   | 5,090            |
| H3K9me2      | pEV1     | 10,463           |
| 5S rDNA      | pXV1_5S  | 107              |
| 35S rDNA     | pZR1_18S | 199              |

**D: Major terminal satellite sequences (pAV34)**

| Chromosome orientation | Position in EL10.1     | Number in EL10.1 |
|------------------------|------------------------|------------------|
| Chr1 - N               | 34,591..49,546         | 38               |
| Chr1                   | not found              | -                |
| Chr2-(S)               | 1,010..7,486           | 21               |
| Chr2-(N)               | 40,597,947..54,946,504 | 22               |
| Chr3 -N                | 16,918..24,744         | 16               |
| Chr3-S                 | 54,068,612..54,100,447 | 83               |
| Chr4-(S)               | 6..15,705              | 42               |
| Chr4-(N)               | 39,426,832..61,140,574 | 95               |
| Chr5-(S) Scaffold 5    | 1,596,750..1,657,270   | 152              |
| Chr5                   | 6,732,312..6,741,739   | 19               |
| Chr5                   | 41,593,251..41,598,882 | 13               |
| Chr5-(N)               | 59,198,215..59,224,585 | 71               |
| Chr6-(S)               | 4..4,595               | 11               |
| Chr6-(N)               | 6,5072,913..65,073,571 | 3                |
| Chr7-(S)               | 1,002..15,434          | 45               |
| Chr7                   | 8,866,608..8,879,321   | 24               |
| Chr7                   | 21,826,741..21,836,557 | 26               |
| Chr8-(S)               | 5..16,336              | 35               |
| Chr8-(N)               | 43,367,644..57,938,902 | 101              |
| Chr9                   | 25,507,827..26,781,523 | 3                |
| Chr9-(N)               | 52,020,904..52,159,048 | 256              |

Table 15: Characteristics of tandem repeats in the EL10.1 genome assembly.

| Target             | Length     | Number of |             | Mean Copy |       | Median Copy | Maximum | Distinct | Mean Percent |             |
|--------------------|------------|-----------|-------------|-----------|-------|-------------|---------|----------|--------------|-------------|
|                    |            | Tandem    | Tandem      | Number    | stdev | Number      | Copy    |          | Match        | Mean Indels |
|                    |            | Repeats   | Repeats/ Mb |           |       |             | Number  | Types    |              |             |
| Chromosome 1       | 58,086,001 | 36,834    | 634.1       | 7.8       | 35.7  | 2.8         | 3290.3  | 816      | 86.1         | 5.2         |
| Chromosome 2       | 54,971,872 | 37,041    | 673.8       | 7.5       | 27.3  | 2.9         | 2073.0  | 784      | 85.9         | 5.4         |
| Chromosome 3       | 54,100,447 | 33,183    | 613.4       | 7.8       | 24.1  | 2.8         | 1424.0  | 781      | 86.3         | 5.0         |
| Chromosome 4       | 61,163,185 | 38,116    | 623.2       | 7.9       | 26.4  | 2.9         | 1441.0  | 843      | 86.2         | 5.2         |
| Chromosome 5       | 59,224,585 | 37,876    | 639.5       | 7.8       | 23.3  | 2.8         | 1477.2  | 845      | 86.1         | 5.3         |
| Chromosome 6       | 65,096,967 | 39,448    | 606.0       | 8.2       | 28.3  | 2.9         | 1747.0  | 898      | 86.3         | 5.1         |
| Chromosome 7       | 57,353,724 | 36,137    | 630.1       | 7.5       | 23.3  | 2.8         | 1217.3  | 794      | 86.3         | 5.1         |
| Chromosome 8       | 57,938,902 | 36,560    | 631.0       | 7.8       | 22.2  | 2.9         | 1136.3  | 840      | 86.2         | 5.2         |
| Chromosome 9       | 52,180,088 | 32,462    | 622.1       | 8.1       | 26.3  | 2.8         | 1663.5  | 815      | 86.1         | 5.2         |
| Chromosome mean    |            |           | 630.4       |           |       |             |         |          |              |             |
| Chromosome std dev |            |           | 19.3        |           |       |             |         |          |              |             |
| Scaffold 1         | 2,519,862  | 1,618     | 642.1       | 7.9       | 18.4  | 2.8         | 373.8   | 238      | 86.1         | 5.1         |
| Scaffold 2         | 2,420,327  | 1,529     | 631.7       | 8.9       | 21.0  | 2.8         | 383.0   | 261      | 86.4         | 5.1         |
| Scaffold 3         | 1,921,869  | 1,050     | 546.3       | 6.2       | 12.6  | 2.8         | 223.0   | 169      | 86.4         | 4.9         |
| Scaffold 4         | 1,802,165  | 1,173     | 650.9       | 8.9       | 30.8  | 2.9         | 661.5   | 201      | 85.9         | 5.4         |
| Scaffold 5         | 1,679,391  | 799       | 475.8       | 8.3       | 58.2  | 2.9         | 1628.4  | 159      | 86.5         | 4.8         |
| Scaffold 6         | 1,639,599  | 1,061     | 647.1       | 9.1       | 33.2  | 2.8         | 703.0   | 185      | 86.1         | 5.1         |
| Scaffold 7         | 1,327,247  | 705       | 531.2       | 7.2       | 16.4  | 3.0         | 269.0   | 142      | 86.9         | 4.9         |
| Scaffold 8         | 1,116,489  | 686       | 614.4       | 7.0       | 10.1  | 2.9         | 82.7    | 159      | 86.6         | 4.7         |
| Scaffold 9         | 912,454    | 420       | 460.3       | 9.0       | 59.2  | 2.6         | 1190.0  | 97       | 87.0         | 4.7         |
| Scaffold 10        | 511,739    | 290       | 566.7       | 10.2      | 23.3  | 2.9         | 230.2   | 98       | 86.7         | 5.2         |
| Scaffold 11        | 457,683    | 546       | 1193.0      | 4.1       | 9.8   | 2.9         | 196.0   | 66       | 84.9         | 8.0         |
| Scaffold 12        | 413,183    | 174       | 421.1       | 9.3       | 35.3  | 2.6         | 391.3   | 57       | 87.5         | 4.7         |
| Scaffold 13        | 378,582    | 244       | 644.5       | 9.6       | 31.9  | 2.8         | 384.8   | 77       | 86.5         | 5.0         |
| Scaffold 14        | 366,083    | 279       | 762.1       | 5.5       | 9.5   | 2.7         | 98.5    | 74       | 86.0         | 5.2         |
| Scaffold 15        | 344,704    | 109       | 316.2       | 8.2       | 14.9  | 2.7         | 88.8    | 49       | 89.0         | 4.1         |
| Scaffold 16        | 282,902    | 812       | 2870.3      | 3.3       | 3.6   | 3.0         | 70.9    | 47       | 84.5         | 9.8         |
| Scaffold 17        | 281,078    | 61        | 217.0       | 4.5       | 4.9   | 2.4         | 22.2    | 27       | 90.4         | 2.7         |
| Scaffold 18        | 278,623    | 108       | 387.6       | 7.2       | 12.2  | 2.6         | 89.0    | 48       | 88.2         | 4.0         |
| Scaffold 19        | 267,222    | 181       | 677.3       | 6.0       | 9.8   | 2.7         | 53.0    | 54       | 88.8         | 4.1         |
| Scaffold 20        | 264,226    | 131       | 495.8       | 6.9       | 11.5  | 3.1         | 93.0    | 55       | 85.5         | 6.0         |
| Scaffold 21        | 232,983    | 107       | 459.3       | 20.1      | 39.1  | 5.4         | 219.3   | 63       | 81.6         | 5.4         |
| Scaffold 22        | 195,802    | 96        | 490.3       | 6.3       | 10.3  | 2.7         | 61.5    | 40       | 88.7         | 4.6         |
| Scaffold 23        | 155,017    | 24        | 154.8       | 9.1       | 16.5  | 2.6         | 76.2    | 15       | 93.4         | 2.3         |
| Scaffold 24        | 136,997    | 260       | 1897.9      | 3.5       | 3.9   | 2.9         | 38.0    | 31       | 85.1         | 10.0        |
| Scaffold 25        | 135,273    | 39        | 288.3       | 6.0       | 8.5   | 3.0         | 46.0    | 29       | 84.4         | 6.5         |
| Scaffold 26        | 131,654    | 116       | 881.1       | 5.3       | 7.1   | 3.0         | 48.0    | 51       | 85.0         | 5.0         |
| Scaffold 27        | 130,158    | 55        | 422.6       | 11.0      | 15.9  | 3.1         | 57.0    | 38       | 86.1         | 6.9         |
| Scaffold 28        | 91,000     | 39        | 428.6       | 4.0       | 3.8   | 2.5         | 22.0    | 24       | 87.7         | 4.0         |
| Scaffold 29        | 14,771     | 6         | 406.2       | 6.7       | 10.0  | 2.9         | 27.0    | 5        | 92.7         | 2.0         |
| Scaffold 30        | 11,875     | 11        | 926.3       | 12.5      | 11.7  | 9.8         | 41.1    | 11       | 82.6         | 3.9         |
| overall mean       |            |           | 661.0       |           |       |             |         |          |              |             |
| overall stdev      |            |           | 460.8       |           |       |             |         |          |              |             |

Table 16: Read count mapping of short reads from EL10 and four other germplasms to the EL10.1 genome assembly.

| Target         | Length     | EL10 self mapping |                   |                    | C869_25    |                   |                    | C869_UK    |                   |                    | KWS2320    |                   |                    | NK-388mm-O |                   |                    |
|----------------|------------|-------------------|-------------------|--------------------|------------|-------------------|--------------------|------------|-------------------|--------------------|------------|-------------------|--------------------|------------|-------------------|--------------------|
|                |            | Mapped (%)        | Median Read depth | Std Dev Read Depth | Mapped (%) | Median Read depth | Std Dev Read Depth | Mapped (%) | Median Read depth | Std Dev Read Depth | Mapped (%) | Median Read depth | Std Dev Read Depth | Mapped (%) | Median Read depth | Std Dev Read Depth |
| Chromosome 1   | 58,086,001 | 99.67             | 36                | 245.4              | 99.91      | 34                | 198.8              | 98.42      | 34                | 210.5              | 98.78      | 37                | 320.5              | 98.78      | 39                | 229.0              |
| Chromosome 2   | 54,971,872 | 99.75             | 37                | 155.7              | 99.96      | 34                | 140.9              | 98.46      | 34                | 182.8              | 98.60      | 37                | 166.4              | 99.05      | 40                | 153.1              |
| Chromosome 3   | 54,100,447 | 99.73             | 36                | 35.8               | 99.93      | 33                | 38.0               | 98.55      | 34                | 52.3               | 97.83      | 34                | 50.4               | 98.87      | 39                | 65.9               |
| Chromosome 4   | 61,163,185 | 99.71             | 36                | 97.5               | 99.81      | 33                | 84.8               | 98.21      | 33                | 102.0              | 97.83      | 35                | 133.1              | 98.78      | 39                | 93.0               |
| Chromosome 5   | 59,224,585 | 99.74             | 36                | 239.2              | 99.84      | 33                | 186.9              | 98.88      | 35                | 241.0              | 98.71      | 36                | 183.8              | 99.09      | 39                | 204.6              |
| Chromosome 6   | 65,096,967 | 99.72             | 36                | 183.7              | 99.86      | 33                | 215.6              | 97.83      | 32                | 272.0              | 97.61      | 34                | 150.1              | 98.44      | 38                | 288.9              |
| Chromosome 7   | 57,353,724 | 99.60             | 36                | 293.3              | 99.89      | 33                | 228.2              | 98.94      | 35                | 183.6              | 98.56      | 36                | 380.7              | 99.13      | 40                | 264.4              |
| Chromosome 8   | 57,938,902 | 99.69             | 36                | 102.7              | 99.86      | 33                | 81.6               | 98.68      | 34                | 109.3              | 98.83      | 37                | 114.6              | 98.97      | 39                | 93.0               |
| Chromosome 9   | 52,180,088 | 99.74             | 36                | 194.4              | 99.93      | 33                | 152.6              | 98.09      | 33                | 144.5              | 97.62      | 34                | 299.0              | 99.03      | 39                | 179.9              |
| Scaffold 1     | 2,519,862  | 99.76             | 36                | 587.3              | 99.88      | 30                | 539.8              | 99.42      | 35                | 904.0              | 99.66      | 44                | 416.5              | 99.82      | 39                | 573.4              |
| Scaffold 2     | 2,420,327  | 99.81             | 36                | 879.5              | 99.99      | 31                | 605.9              | 95.15      | 28                | 889.2              | 96.20      | 29                | 798.4              | 96.99      | 34                | 699.4              |
| Scaffold 3     | 1,921,869  | 99.90             | 36                | 658.1              | 99.99      | 31                | 516.9              | 99.45      | 33                | 1027.7             | 98.52      | 43                | 385.5              | 98.30      | 39                | 757.8              |
| Scaffold 4     | 1,802,165  | 99.85             | 37                | 530.0              | 99.98      | 34                | 345.9              | 99.39      | 37                | 627.1              | 99.38      | 41                | 298.9              | 98.55      | 38                | 404.7              |
| Scaffold 5     | 1,679,391  | 99.92             | 36                | 223.1              | 99.98      | 34                | 233.8              | 99.25      | 36                | 269.7              | 99.46      | 35                | 219.0              | 99.69      | 40                | 228.8              |
| Scaffold 6     | 1,639,599  | 99.67             | 36                | 624.3              | 99.98      | 31                | 379.1              | 99.54      | 35                | 238.5              | 96.97      | 31                | 1082.3             | 97.33      | 38                | 506.3              |
| Scaffold 7     | 1,327,247  | 99.81             | 35                | 858.4              | 100.00     | 32                | 518.6              | 98.79      | 30                | 308.7              | 98.29      | 37                | 1731.4             | 99.28      | 38                | 902.8              |
| Scaffold 8     | 1,116,489  | 99.87             | 36                | 17.7               | 99.89      | 33                | 19.2               | 98.71      | 34                | 23.2               | 98.36      | 30                | 23.4               | 98.49      | 37                | 26.8               |
| Scaffold 9     | 912,454    | 99.84             | 37                | 1475.4             | 99.96      | 37                | 1117.3             | 99.53      | 40                | 1200.9             | 99.51      | 42                | 1329.4             | 99.96      | 41                | 1099.2             |
| Scaffold 10    | 511,739    | 98.55             | 36                | 3172.2             | 98.75      | 35                | 1884.7             | 99.26      | 37                | 1124.1             | 98.16      | 41                | 5187.9             | 98.84      | 42                | 2344.3             |
| Scaffold 11    | 457,683    | 99.94             | 53                | 1459.9             | 99.99      | 55                | 890.9              | 99.47      | 58                | 921.4              | 99.84      | 83                | 2464.1             | 99.94      | 65                | 1404.3             |
| Scaffold 12    | 413,183    | 99.86             | 41                | 5184.2             | 99.99      | 34                | 3978.5             | 99.56      | 42                | 4847.5             | 99.36      | 55                | 4276.1             | 98.56      | 41                | 3898.0             |
| Scaffold 13    | 378,582    | 99.43             | 36                | 11.4               | 99.98      | 32                | 13.6               | 99.49      | 33                | 23.5               | 97.26      | 31                | 21.2               | 99.51      | 39                | 17.5               |
| Scaffold 14    | 366,083    | 99.45             | 36                | 13.1               | 98.78      | 31                | 20.7               | 98.10      | 32                | 26.9               | 95.62      | 29                | 32.9               | 97.33      | 35                | 28.3               |
| Scaffold 15    | 344,704    | 97.07             | 51                | 3099.3             | 96.99      | 44                | 2641.9             | 96.90      | 51                | 3887.8             | 95.92      | 44                | 3244.1             | 96.96      | 47                | 2837.0             |
| Scaffold 16    | 282,902    | 99.96             | 547               | 1740.7             | 99.95      | 545               | 2253.9             | 99.96      | 567               | 3376.0             | 99.95      | 388               | 1478.6             | 99.93      | 475               | 3093.4             |
| Scaffold 17    | 281,078    | 99.91             | 299               | 783.1              | 99.71      | 313               | 619.3              | 99.57      | 387               | 1308.8             | 99.87      | 314               | 406.7              | 99.68      | 245               | 828.8              |
| Scaffold 18    | 278,623    | 99.18             | 36                | 2774.8             | 99.06      | 32                | 2779.0             | 97.86      | 29                | 2788.5             | 96.55      | 38                | 3372.3             | 98.50      | 37                | 2827.8             |
| Scaffold 19    | 267,222    | 99.83             | 39                | 979.7              | 99.55      | 34                | 685.4              | 99.15      | 30                | 543.4              | 99.03      | 47                | 1808.8             | 99.22      | 38                | 1082.9             |
| Scaffold 20    | 264,226    | 98.58             | 45                | 1760.8             | 98.63      | 37                | 1908.8             | 97.84      | 43                | 2357.0             | 97.40      | 54                | 820.0              | 97.28      | 42                | 1073.7             |
| Scaffold 21    | 232,983    | 99.97             | 220               | 152.7              | 99.96      | 181               | 159.1              | 99.86      | 122               | 238.5              | 99.94      | 289               | 235.6              | 99.36      | 145               | 164.9              |
| Scaffold 22    | 195,802    | 99.93             | 41                | 2483.3             | 99.98      | 35                | 2416.5             | 97.40      | 31                | 1980.0             | 98.64      | 50                | 1809.9             | 97.96      | 38                | 1903.3             |
| Scaffold 23    | 155,017    | 99.76             | 835               | 2449.1             | 99.86      | 606               | 3300.6             | 99.92      | 612               | 3582.5             | 99.83      | 426               | 1417.7             | 99.46      | 540               | 3106.8             |
| Scaffold 24    | 136,997    | 100.00            | 960               | 3837.2             | 100.00     | 922               | 4081.7             | 100.00     | 833               | 5049.4             | 100.00     | 527               | 3487.4             | 100.00     | 799               | 3957.9             |
| Scaffold 25    | 135,273    | 95.76             | 34                | 15.8               | 96.13      | 29                | 19.0               | 95.04      | 26                | 76.2               | 95.10      | 43                | 25.4               | 95.73      | 37                | 38.2               |
| Scaffold 26    | 131,654    | 98.13             | 35                | 377.4              | 97.92      | 31                | 414.8              | 97.44      | 29                | 484.3              | 97.55      | 38                | 569.4              | 97.69      | 35                | 481.0              |
| Scaffold 27    | 130,158    | 96.49             | 34                | 21.4               | 96.92      | 24                | 19.6               | 93.89      | 13                | 37.5               | 93.34      | 11                | 48.1               | 92.24      | 16                | 39.8               |
| Scaffold 28    | 91,000     | 99.99             | 75                | 4410.0             | 99.99      | 46                | 3162.4             | 99.44      | 45                | 3291.8             | 99.81      | 50                | 2210.2             | 99.99      | 38                | 2187.7             |
| Scaffold 29    | 14,771     | 99.90             | 42                | 14.0               | 99.89      | 43                | 13.6               | 99.70      | 32                | 18.1               | 99.95      | 46                | 31.9               | 99.80      | 44                | 20.9               |
| Scaffold 30    | 11,875     | 98.35             | 333               | 2809.1             | 97.78      | 268               | 1864.4             | 97.06      | 146               | 1188.4             | 98.11      | 463               | 5209.8             | 97.54      | 224               | 2927.4             |
| Chrs Mean      |            | 99.71             |                   |                    | 99.89      |                   |                    | 98.45      |                   |                    | 98.26      |                   |                    | 98.90      |                   |                    |
| Chrs Stdev     |            | 0.05              |                   |                    | 0.05       |                   |                    | 0.36       |                   |                    | 0.52       |                   |                    | 0.22       |                   |                    |
| Scaffold Mean  |            | 99.30             |                   |                    | 99.33      |                   |                    | 98.54      |                   |                    | 98.25      |                   |                    | 98.41      |                   |                    |
| Scaffold Stdev |            | 1.11              |                   |                    | 1.10       |                   |                    | 1.59       |                   |                    | 1.74       |                   |                    | 1.75       |                   |                    |

Table 17: Proportion and metrics of synteny (co-linear blocks of MAKER beet gene predictions) shared among five species.

| Species                        | <i>C. quinoa</i> | <i>A. hypocondriacus</i> | <i>S. oleracea</i> | <i>V. vinefera</i> | <i>A. thaliana</i> |
|--------------------------------|------------------|--------------------------|--------------------|--------------------|--------------------|
| Common name                    | quinoa           | amaranth                 | spinach            | grape              | Arabidopsis        |
| Chromosome number              | 2n=4x=36         | 2n=4x=32                 | 2n=2x=12           | 2n=2x=38           | 2n=2x=10           |
| Number of synteny blocks       | 854              | 599                      | 410                | 547                | 734                |
| Number of genes in blocks      | 25,832           | 14,519                   | 8,437              | 10,711             | 9,228              |
| Mean number of genes per block | 30.2             | 24.2                     | 20.6               | 19.6               | 12.6               |
| Stdev                          | 51.4             | 31.2                     | 27.6               | 22.4               | 8.7                |
| Range                          | 5 - 490          | 5 - 245                  | 6 - 261            | 6 - 223            | 6 - 74             |



Figure 1: Chromosome alignment of the EL10 assembly (x-axis) versus RefBeet-1.2 assembly (y-axis) by EL10.1 Chromosome. Alignments less than 5 kb in length were removed before plotting. Alignments with matching orientation are shown in red, inversions are shown in blue. Unassembled RefBeet regions are indicated by gaps.

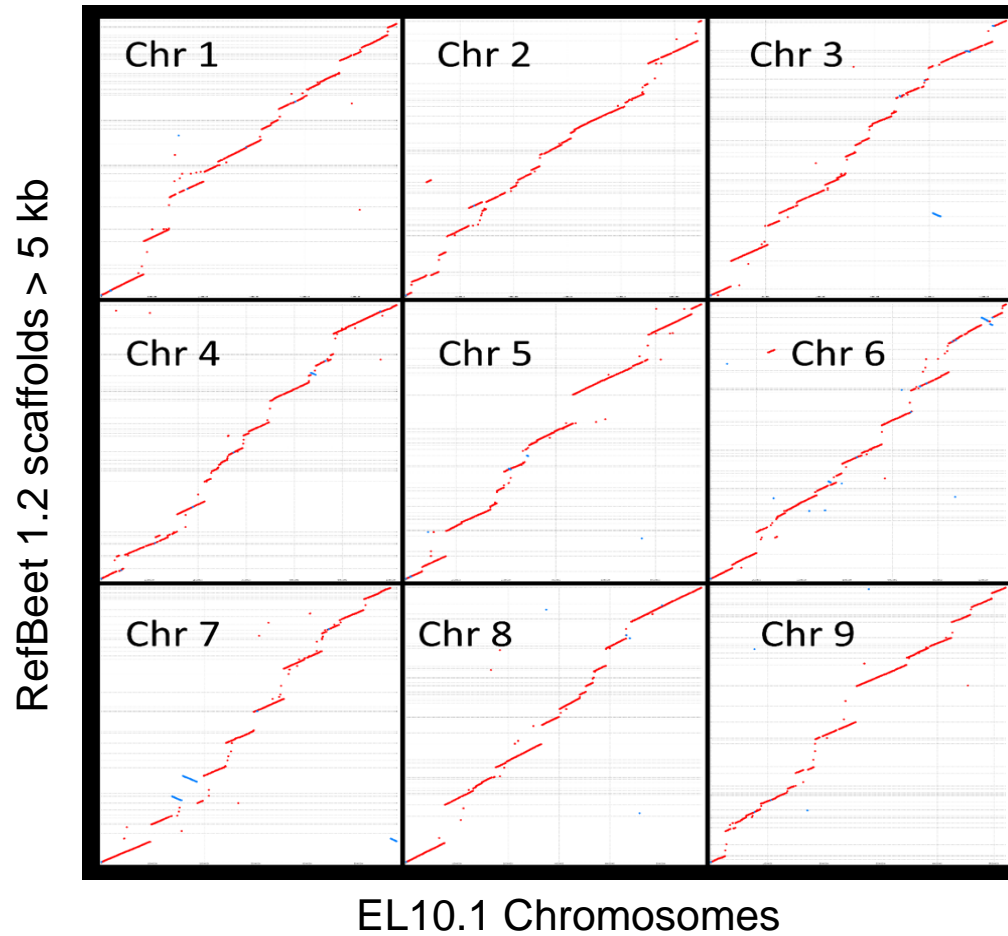

Figure 2: Comparison of contiguity between EL10.1 and EL10.2 genome assemblies. Alignments with matching orientation are shown in red, inversions are shown in blue.

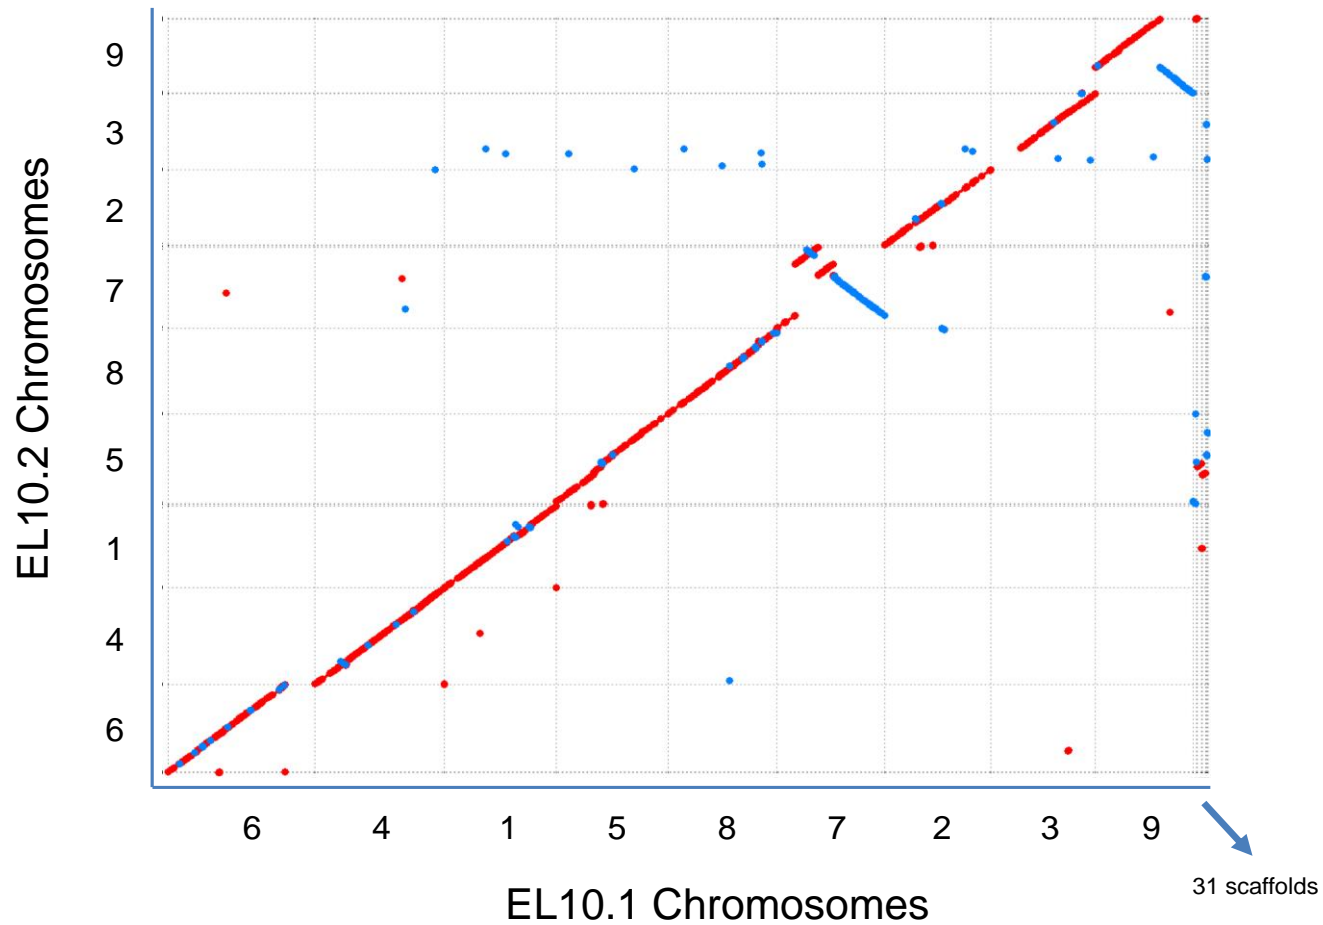

Figure 3: Self-synteny of EL10.1 Chromosomes against the EL10.1 predicted protein set.

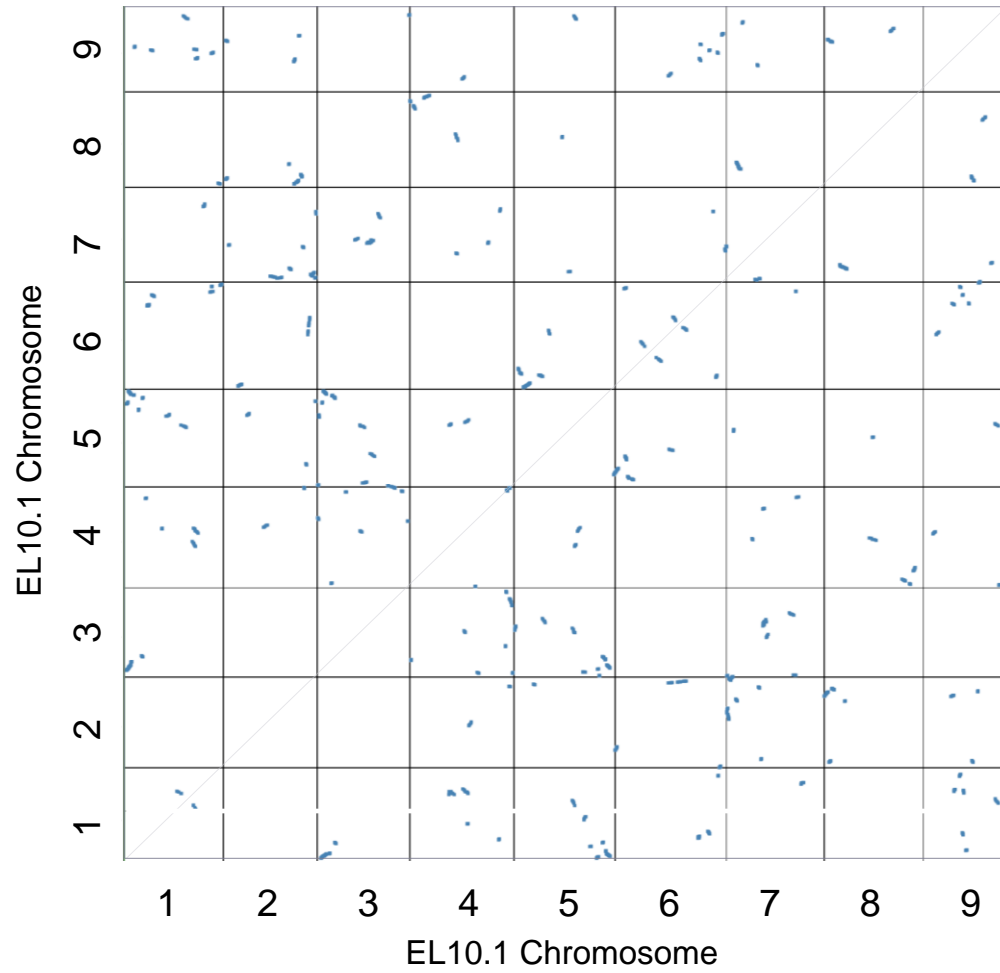

Figure 4: Distribution of LTR Copia and Gypsy retrotransposon elements across the EL10.1 Chromosomes.

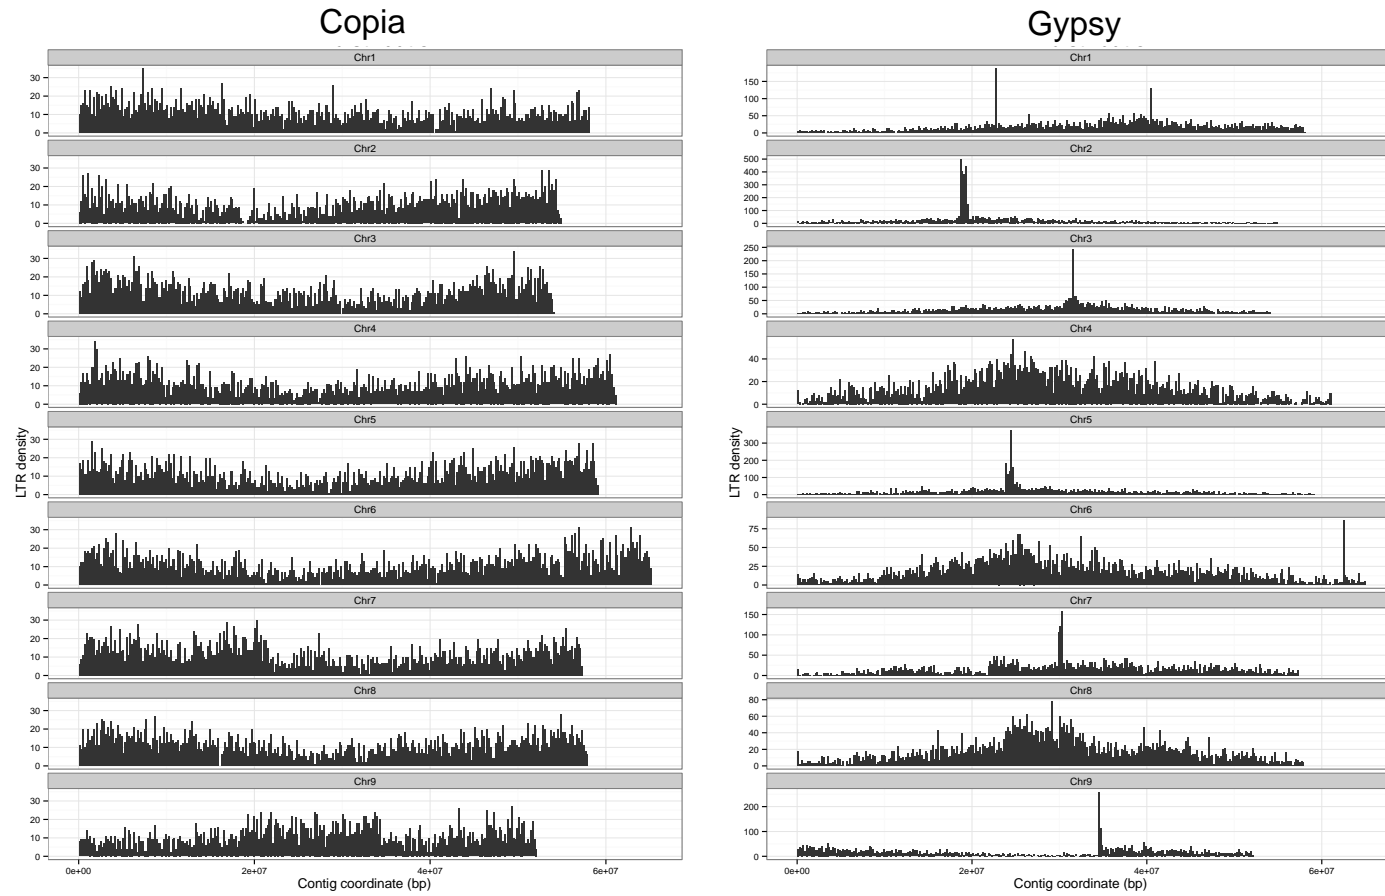

Figure 5: Copy number per consensus tandem repeat length in the EL10.1 genome assembly.

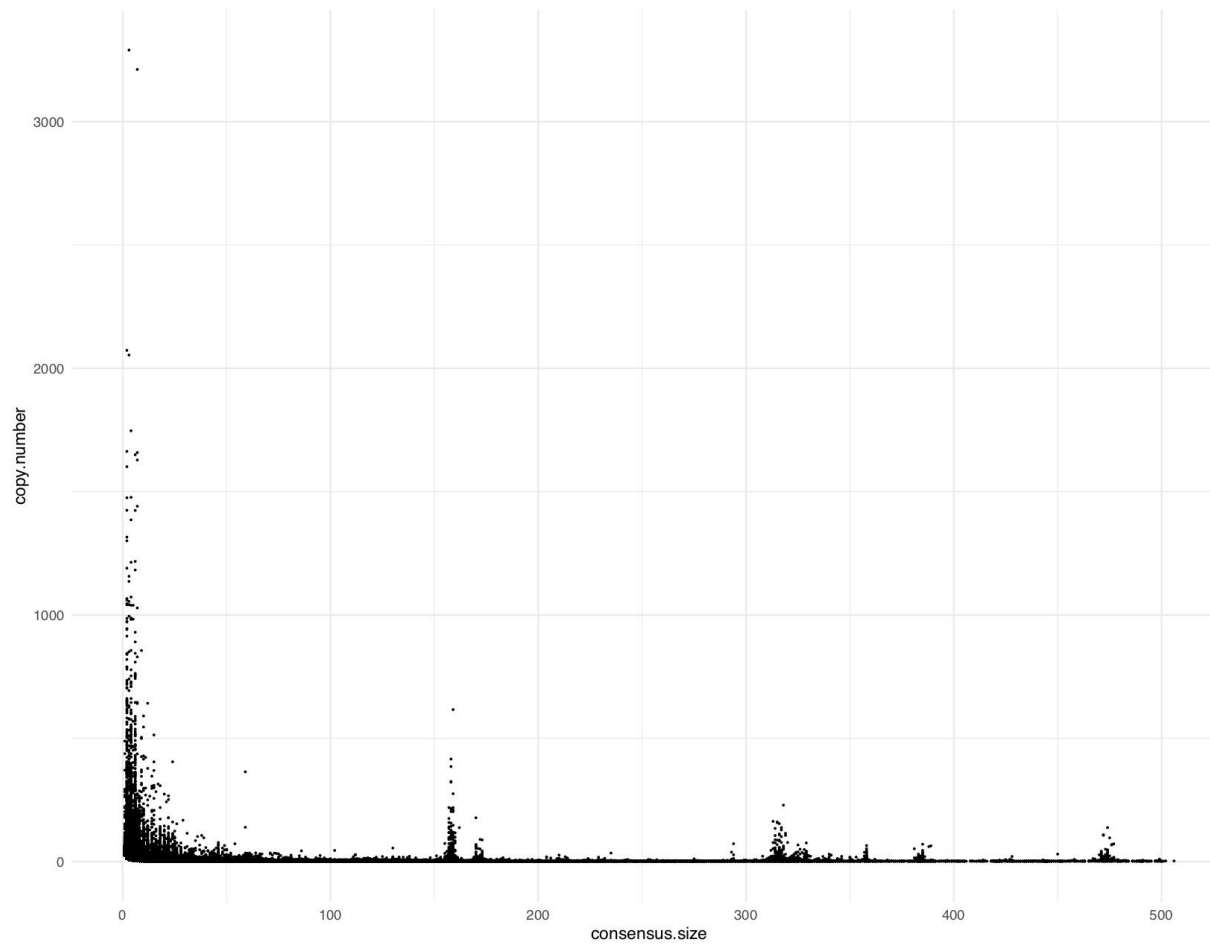

Figure 6: LTR Assembly Index (LAI) of the RefBeet assembly (A) and EL10 assembly (B) of the sugar beet genome. X-axes denote pseudochromosomes of the two assemblies. Each dot represents regional LAI in a 3 Mb window. Red-dotted lines indicate the LAI cutoff of the reference genome quality (LAI = 10). Blue-dotted lines indicate the mean LAI.

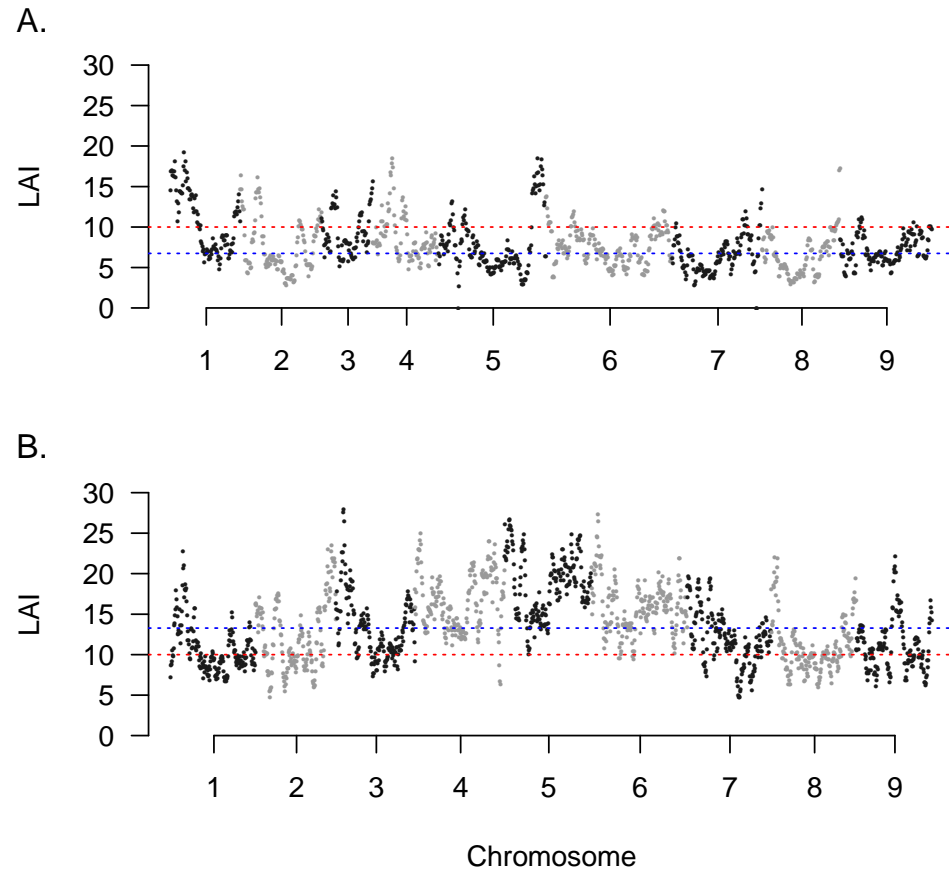

Figure 7: Read count mapping of short reads from EL10 and four other germplasm to the EL10.1 genome assembly and the standard deviation of reads mapped to each 5 kb window across the entire EL10.1 genome assembly.

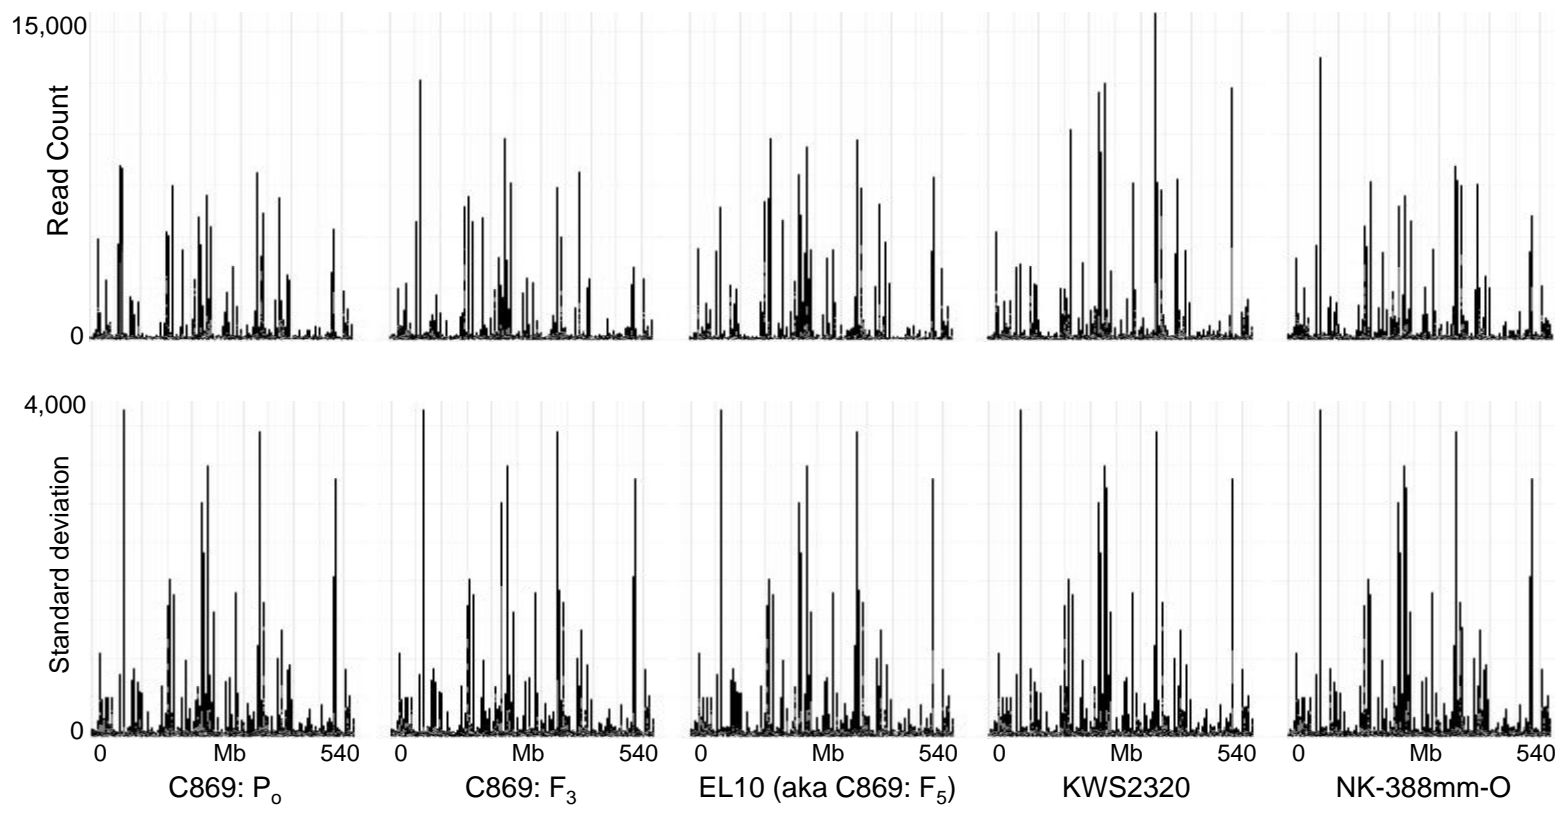

Figure 8: Distribution of high-copy number variant differences (>2000 copies per 5 kb window) between open pollinated population C869\_25 and four inbred sugar beets across Chromosome 1 of the EL10.1 genome assembly.

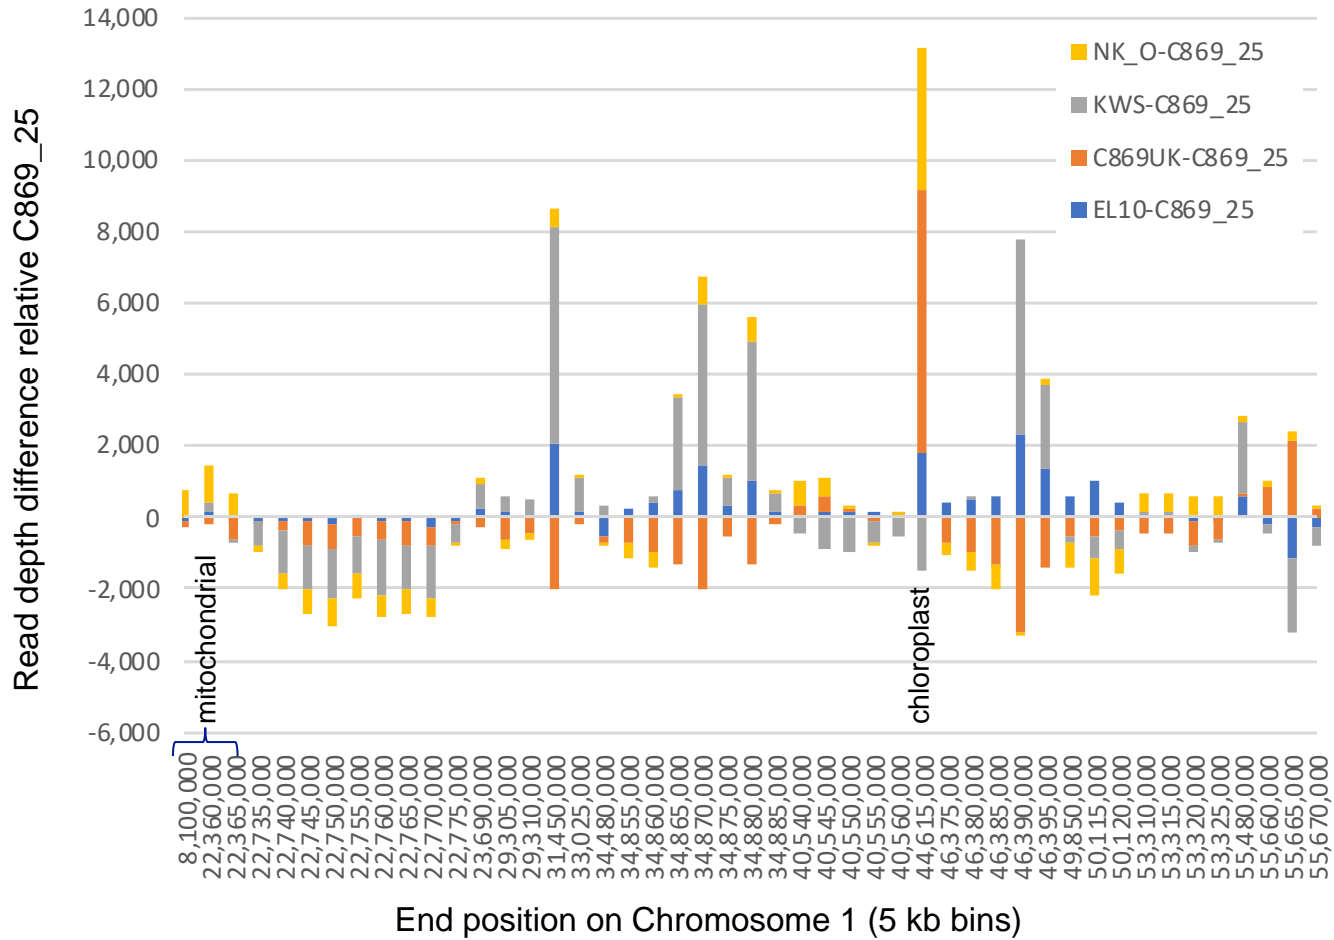



Figure 9: Visualization of syntenic blocks among Caryophyllales genomes relative to *B. vulgaris* EL10.1 Chromosomes compared with two representative Rosid species, color coded by EL10.1 Chromosome.

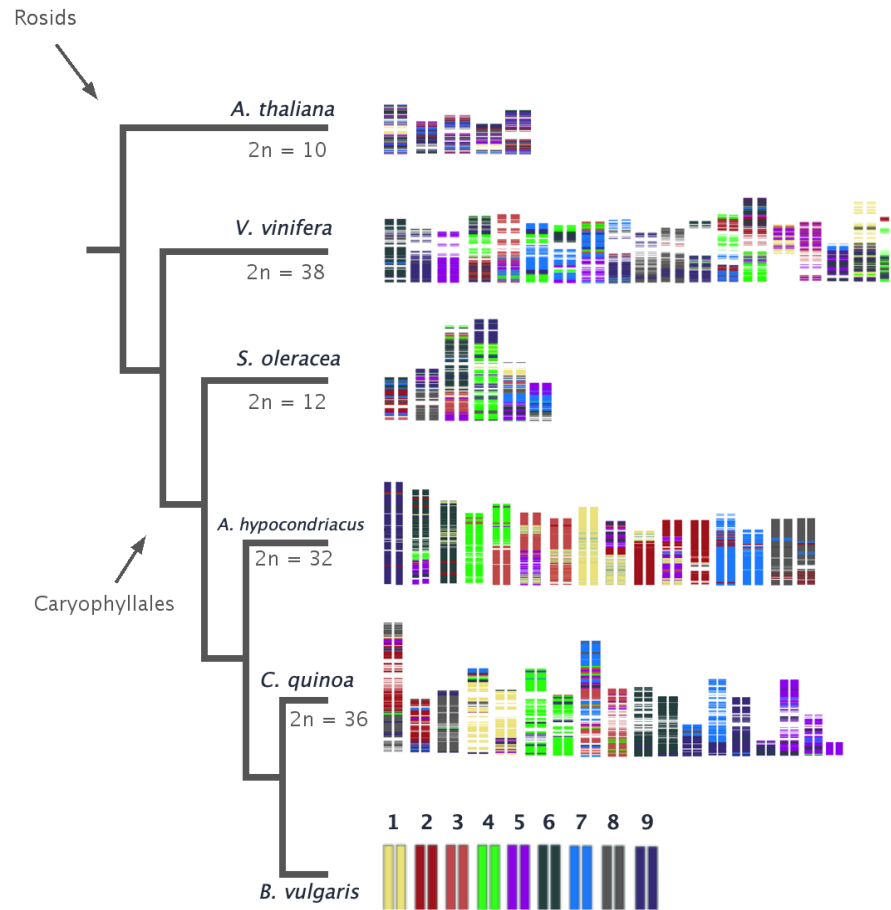

## Parsed Citations

- Abe, J., Guan, G-P., and Shimamoto, Y. (1993) Linkage maps for nine isozyme and four marker loci in sugarbeet (*Beta vulgaris* L.). *Euphytica* 66:117-126.  
Google Scholar: [Author Only](#) [Title Only](#) [Author and Title](#)
- Altschul SF, Gish W, Miller W, Myers EW, Lipman DJ (1990) Basic local alignment search tool. *Journal of Molecular Biology* 215:403-410  
Google Scholar: [Author Only](#) [Title Only](#) [Author and Title](#)
- Andrello, M., K. Henry, P. Devaux, B. Desprez, and S. Manel. 2016. Taxonomic, spatial and adaptive genetic variation of Beta section Beta. *Theor. Appl. Genet.* 129:257–271.  
Google Scholar: [Author Only](#) [Title Only](#) [Author and Title](#)
- Andrello, M., K. Henry, P. Devaux, D. Verdelet, D., B. Desprez, and S. Manel. 2017. Insights into the genetic relationships among plants of Beta section Beta using SNP markers. *Theor. Appl. Genet.* 130:1857-1866.  
Google Scholar: [Author Only](#) [Title Only](#) [Author and Title](#)
- Arumuganathan, K., and E.D. Earle. 1991. Nuclear DNA content of some important plant species. *Plant Mol. Biol. Rep.* 9:208-218.  
Google Scholar: [Author Only](#) [Title Only](#) [Author and Title](#)
- Bennetzen JL, Wang H (2014) The contributions of transposable elements to the structure, function, and evolution of plant genomes. *Annual Review of Plant Biology* 65:505–530.  
Google Scholar: [Author Only](#) [Title Only](#) [Author and Title](#)
- Benson, G. (1999) Tandem repeats finder: a program to analyze DNA sequences. *Nucleic Acid Research* 27:573-580.  
Google Scholar: [Author Only](#) [Title Only](#) [Author and Title](#)
- Biancardi, E., L.W. Panella, and R.T. Lewellen. 2012. *Beta maritima: The origin of beets*. Springer, New York.  
Google Scholar: [Author Only](#) [Title Only](#) [Author and Title](#)
- Bickhart DM, Rosen BD, Koren S, Sayre BL, Hastie AR, Chan S, Lee J, Lam ET, Liachko I, Sullivan ST, Burton JN, Huson HJ, Nystrom JC, Kelley CM, Hutchison JL, Zhou Y, Sun J, Crisà A, Ponce de León FA, Schwartz JC, Hammond JA, Waldbieser GC, Schroeder SG, Liu GE, Dunham MJ, Shendure J, Sonstegard TS, Phillippy AM, Van Tassel CP, Smith TPL (2017) Single-molecule sequencing and chromatin conformation capture enable de novo reference assembly of the domestic goat genome. *Nature Genetics* 49: 643-650.  
Google Scholar: [Author Only](#) [Title Only](#) [Author and Title](#)
- Bushnell, B. (2014). *BBMap: A fast, accurate, splice-aware aligner*. - Report Number: LBNL-7065E.  
Google Scholar: [Author Only](#) [Title Only](#) [Author and Title](#)
- Butterfass, T. 1964. Die chloroplastenzahlen in verschiedenartigen zel- len trisomer zuckerruben (*Beta vulgaris* L.). *Z. Bot.* 52:46–77.  
Google Scholar: [Author Only](#) [Title Only](#) [Author and Title](#)
- Campbell, M.S., Law, M., Holt, C., Stein, J.C., Moghe, G.D., Hufnagel, D.E., Lei, J., Achawanantakun, R., Jiao, D., Lawrence, C.J., et al. (2014). *MAKER-P: A tool kit for the rapid creation, management, and quality control of plant genome annotations*. *Plant Physiol.* 164: 513–524.  
Google Scholar: [Author Only](#) [Title Only](#) [Author and Title](#)
- Castro S, Romeiras MM, Castro M, Duarte MC, Loureiro J. (2013) Hidden diversity in wild Beta taxa from Portugal: Insights from genome size and ploidy level estimations using flow cytometry. *Plant Science* 207: 72–78.  
Google Scholar: [Author Only](#) [Title Only](#) [Author and Title](#)
- Cheng, C.-Y., Krishnakumar, V., Chan, A.P., Thibaud-Nissen, F., Schobel, S., and Town, C.D. (2017). *Araport11: a complete reannotation of the Arabidopsis thaliana reference genome*. *Plant J.* 89: 789–804.  
Google Scholar: [Author Only](#) [Title Only](#) [Author and Title](#)
- Dechyeva D, Schmidt T. (2007) Molecular organization of terminal repetitive DNA in Beta species. *Chromosome Res.* 214:881–97.  
Google Scholar: [Author Only](#) [Title Only](#) [Author and Title](#)
- del Rio AR, Minoche AE, Zwickl NF, Friedrich A, Liedtke S, Schmidt T, Himmelbauer H, Dohm JC (2019) Genomes of the wild beets *Beta patula* and *Beta vulgaris* ssp. *maritima*. *The Plant Journal*: DOI:10.1111/tpj.14413.  
Google Scholar: [Author Only](#) [Title Only](#) [Author and Title](#)
- Dohm JC, Lange C, Holtgräwe D, Rosleff Sørensen T, Borchardt D, Schulz B, Lehrach H, Weisshaar B, Himmelbauer H. (2012) Palaeohexaploid ancestry for Caryophyllales inferred from extensive gene-based physical and genetic mapping of the sugar beet genome (*Beta vulgaris*) *Plant J.* 70:528-540.  
Google Scholar: [Author Only](#) [Title Only](#) [Author and Title](#)
- Dohm, J.C., C. Lange, R. Reinhardt, and H. Himmelbauer. 2009. Haplotype divergence in *Beta vulgaris* and microsynteny with sequenced plant genomes. *Plant Journal* 57:14-26.  
Google Scholar: [Author Only](#) [Title Only](#) [Author and Title](#)
- Dohm, J.C., Minoche, A.E., Holtgräwe, D., Capella-Gutiérrez, S., Zakrzewski, F., Tafer, H., Rupp, O., Sørensen, T.R., Stracke, R., Reinhardt, R., A. Goesmann, B. Schulz, P.F. Stadler, T. Schmidt, T. Gabaldón, H. Lehrach, B. Weisshaar, and H. Himmelbauer (2014). *The genome of the recently domesticated crop plant sugar beet (Beta vulgaris)*. *Nature* 505, 546–549.  
Google Scholar: [Author Only](#) [Title Only](#) [Author and Title](#)
- Doležel, J., Bartoš, J., Voglmayr, H. and Greilhuber, J. (2003), Letter to the editor. *Cytometry*, 51A: 127–128. doi:10.1002/cyto.a.10013  
Google Scholar: [Author Only](#) [Title Only](#) [Author and Title](#)

Earl D, Bradnam K, St John J, Darling A, Lin D, Fass J, Yu HO, Buffalo V, Zerbino DR, Diekhans M, Nguyen N, Ariyaratne PN, Sung WK, Ning Z, Haimeil M, Simpson JT, Fonseca NA, Birol I, Docking TR, Ho IY, Rokhsar DS, Chikhi R, Lavenier D, Chapuis G, Naquin D, Maillet N, Schatz MC, Kelley DR, Phillippy AM, Koren S, Yang SP, Wu W, Chou WC, Srivastava A, Shaw TI, Ruby JG, Skewes-Cox P, Betegon M, Dimon MT, Solovye V, Seledtsov I, Kosarev P, Vorobyev D, Ramirez-Gonzalez R, Leggett R, MacLean D, Xia F, Luo R, Li Z, Xie Y, Liu B, Gnerre S, MacCallum I, Przybylski D, Ribeiro FJ, Yin S, Sharpe T, Hall G, Kersey PJ, Durbin R, Jackman SD, Chapman JA, Huang X, DeRisi JL, Caccamo M, Li Y, Jaffe DB, Green RE, Haussler D, Korf I, Paten B. (2011) Assemblathon 1: a competitive assessment of de novo short read assembly methods. *Genome Res.* 21:2224-2241. doi: 10.1101/gr.126599.111.

Google Scholar: [Author Only](#) [Title Only](#) [Author and Title](#)

Fernandez-Pozo, N., Menda, N., Edwards, J.D., Saha, S., Teclé, I.Y., Strickler, S.R., Bombarely, A., Fisher-York, T., Pujar, A., Foerster, H., et al. (2015). The Sol Genomics Network (SGN)-from genotype to phenotype to breeding. *Nucleic Acids Res.* 43, D1036–D1041.

Google Scholar: [Author Only](#) [Title Only](#) [Author and Title](#)

Finn, R.D., Clements, J., and Eddy, S.R. (2011). HMMER web server: interactive sequence similarity searching. *Nucleic Acids Res.* 39, W29–W37.

Google Scholar: [Author Only](#) [Title Only](#) [Author and Title](#)

Flavell R.B., M.D. Bennet, and J.B. Smith. 1974. Genome size and the proportion of repeated nucleotide sequence DNA in plants. *Biochem. Genet.* 12:257-269.

Google Scholar: [Author Only](#) [Title Only](#) [Author and Title](#)

Funk, A., Galewski, P., McGrath, J. M. (2018) Nucleotide-binding resistance gene signatures in sugar beet, insights from a new reference genome. *The Plant Journal* 95:659-671

Google Scholar: [Author Only](#) [Title Only](#) [Author and Title](#)

Galon, J., and D.T. Zallen. 1998. The role of the Vilmorin Company in the promotion and diffusion of the experimental science of heredity in France, 1840–1920. *J. Hist. Biol.* 31:241–262.

Google Scholar: [Author Only](#) [Title Only](#) [Author and Title](#)

Galewski, P., McGrath, J.M. 2020. Genetic diversity among cultivated beets (*Beta vulgaris*) assessed via population-based whole genome sequences. *BMC Genomics* 21:189. <https://doi.org/10.1186/s12864-020-6451-1>

Google Scholar: [Author Only](#) [Title Only](#) [Author and Title](#)

Goldman, I.L., and D. Austin. 2000. Linkage among the R, Y and Bl loci in table beet. *Theor. Appl. Genet.* 100:337–343.

Google Scholar: [Author Only](#) [Title Only](#) [Author and Title](#)

Haas BJ, Delcher AL, Wortman JR, Salzberg SL (2004) DAGchainer: a tool for mining segmental genome duplications and synteny. *Bioinformatics* 20: 3643–3646

Google Scholar: [Author Only](#) [Title Only](#) [Author and Title](#)

Halldén, C., D. Åhrén, A. Hjerdin, T. Säll, and N.O. Nilsson. 1998. No conserved homoeologous regions found in the sugar beet genome. *J. Sugar Beet Res.* 35:1-13.

Google Scholar: [Author Only](#) [Title Only](#) [Author and Title](#)

Hatlestad, G.J., N.A. Akhavan, R.M. Sunnadaniya, L. Elam, S. Cargyle, A. Hembd, A. Gonzalez, J.M. McGrath, and A.M. Lloyd. 2014. The beet Y locus is a co-opted anthocyanin MYB that regulates betalain pathway structural genes. *Nature Genetics* 47:92–96.

Google Scholar: [Author Only](#) [Title Only](#) [Author and Title](#)

Hatlestad, G.J., R.M. Sunnadaniya, N.A. Akhavan, A. Gonzalez, I.L. Goldman, J.M. McGrath, and A.M. Lloyd. 2012. The beet R locus encodes a new cytochrome P450 required for red betalain production. *Nature Genetics* 44:816–820.

Google Scholar: [Author Only](#) [Title Only](#) [Author and Title](#)

Holt, C., and Yandell, M. (2011). MAKER2: An annotation pipeline and genome-database management tool for second-generation genome projects. *BMC Bioinformatics* 12, 491.

Google Scholar: [Author Only](#) [Title Only](#) [Author and Title](#)

Hosoda K, Imamura A, Katoh E, Hatta T, Tachiki M, Yamada H, Mizuno T and Yamazaki T (2002) Molecular structure of the GARP family of plant Myb-related DNA binding motifs of the Arabidopsis response regulators. *The Plant Cell* 14:2015–2029

Google Scholar: [Author Only](#) [Title Only](#) [Author and Title](#)

Jarvis DE, Ho YS, Lightfoot DJ, Schmöckel SM, Li B, Borm TJA, et al. 2017. The genome of *Chenopodium quinoa*. *Nature* 542: 307-312

Google Scholar: [Author Only](#) [Title Only](#) [Author and Title](#)

Jung H, Winefield C, Bombarely A, Prentis P, Waterhouse P. (2019) Tools and strategies for long-read sequencing and de novo assembly of plant genomes. *Trends Plant Sci.* 24:700-724.

Google Scholar: [Author Only](#) [Title Only](#) [Author and Title](#)

Keller, W. 1936. Inheritance of some major color types in beets. *J. Agric. Res.* 52:27-38.

Google Scholar: [Author Only](#) [Title Only](#) [Author and Title](#)

Kielbasa, S.M., Wan, R., Sato, K., Horton, P., and Frith, M.C. (2011). Adaptive seeds tame genomic sequence comparison. *Genome Research* 21:487–493.

Google Scholar: [Author Only](#) [Title Only](#) [Author and Title](#)

Korf, I. (2004). Gene finding in novel genomes. *BMC Bioinformatics* 5, 59.

Google Scholar: [Author Only](#) [Title Only](#) [Author and Title](#)

**Kowar T, Zakrzewski F, Macas J, Kobližková A, Viehovec P, Weisshaar B, Schmidt T (2016) Repeat composition of CenH3-chromatin and H3K9me2-marked heterochromatin in sugar beet (*Beta vulgaris*) *BMC Plant Biology* (2016) 16:120**

Krogh, A, Larsson, B., von Heijne, G., and Sonnhammer, E.L.L. (2001) Predicting transmembrane protein topology with a hidden Markov model: application to complete genomes<sup>11</sup> Edited by F. Cohen. *J. Mol. Biol.* 305, 567–580.

Google Scholar: [Author Only](#) [Title Only](#) [Author and Title](#)

Lewellen, R.T. (2004) Registration of C869 and C869CMS. *Crop Sci.* 44:357.

Google Scholar: [Author Only](#) [Title Only](#) [Author and Title](#)

Lightfoot DJ, Jarvis DE, Ramaraj T, Lee R, Jellen EN and Maughan PJ (2017) Single-molecule sequencing and Hi-C-based proximity-guided assembly of amaranth (*Amaranthus hypochondriacus*) chromosomes provide insights into genome evolution. *BMC Biology* (2017) 15:74

Google Scholar: [Author Only](#) [Title Only](#) [Author and Title](#)

Lyons, E., Pedersen, B., Kane, J., Alam, M., Ming, R., Tang, H., Wang, X., Bowers, J., Paterson, A, and Lisch, D. (2008) Finding and comparing syntenic regions among *Arabidopsis* and the outgroups papaya, poplar and grape: CoGe with rosids. *Plant Phys.* 148:1772–1781.

Google Scholar: [Author Only](#) [Title Only](#) [Author and Title](#)

Mason MG, Mathews DE, Argyros DA Maxwell BB, Kieber JJ, Alonso JM, Ecker JR, and Schaller GE. (2005) Multiple Type-B response regulators mediate cytokinin signal transduction in *Arabidopsis*. *The Plant Cell* 17:3007–3018

Google Scholar: [Author Only](#) [Title Only](#) [Author and Title](#)

McGrath JM, Drou N, Waite D, Swarbreck D, Mutasa-Gottgens E, Barnes S, Townsend B. (2013) The 'C869' Sugar Beet Genome: A Draft Assembly. <https://pag.confex.com/pag/xxi/webprogram/Paper5768.html>. Accessed 8/29/2020.

Google Scholar: [Author Only](#) [Title Only](#) [Author and Title](#)

McGrath, J. M., Koppin, T. K. and Duckert, T. M. (2005) Breeding for genetics: Development of Recombinant Inbred Lines (RILs) for gene discovery and deployment. Proceedings of the American Society of Sugar Beet Technologists: 124-132. ([www.bsdf-assbt.org/wp-content/uploads/2017/04/PASSBTAgp124to132BreedingforGeneticsDevelopmentofRecombinantInbredLinesforGeneDiscoveryandDeployment.pdf](http://www.bsdf-assbt.org/wp-content/uploads/2017/04/PASSBTAgp124to132BreedingforGeneticsDevelopmentofRecombinantInbredLinesforGeneDiscoveryandDeployment.pdf); accessed June 16, 2019)

Google Scholar: [Author Only](#) [Title Only](#) [Author and Title](#)

McGrath, J. M., Trebbi, D., Fenwick, A, Panella, L., Schulz, B., Laurent, V., Barnes, S. and Murray, S. C. (2007) An open-source first-generation molecular genetic map from a sugarbeet x table beet cross and its extension to physical mapping. *Crop Science* 47:S-27-S-44.

Google Scholar: [Author Only](#) [Title Only](#) [Author and Title](#)

McGrath, J.M., and B.J. Townsend. (2015) Sugar beet, energy beet, and industrial beet. p. 81-99. In: V.M.V. Cruz and D.A. Dierig (eds.), *Handbook of Plant Breeding. Volume 9. Industrial Crops: Breeding for Bioenergy and Bioproducts*. Springer, New York.

Google Scholar: [Author Only](#) [Title Only](#) [Author and Title](#)

McGrath, J.M., and Panella, L. (2019) Sugar Beet Breeding. *Plant Breeding Reviews* 42:167-218.

Google Scholar: [Author Only](#) [Title Only](#) [Author and Title](#)

McGrath, J.M., Derrico, C.A., Morales, M., Copeland, L.O., Christenson, D.R. (2000) Germination of sugar beet (*Beta vulgaris* L.) seed submerged in hydrogen peroxide and water as a means to discriminate cultivar and seedlot vigor. *Seed Science and Technology*. 28:607-620.

Google Scholar: [Author Only](#) [Title Only](#) [Author and Title](#)

Melters DP, Bradnam KR, Young HA, Telis N, May MR, Ruby JG, Sebra R, Peluso P, Eid J, Rank D, Garcia JF, DeRisi JL, Smith T, Tobias C, Ross-Ibarra J, Korf I, and Chan SWL. (2013) Comparative analysis of tandem repeats from hundreds of species reveals unique insights into centromere evolution. *Genome Biology* 2013 14:R10.

Google Scholar: [Author Only](#) [Title Only](#) [Author and Title](#)

Meyer M, Kircher M. 2010. Illumina Sequencing Library Preparation for Highly Multiplexed Target Capture and Sequencing. *Cold Spring Harbor Protocol* doi:10.1101/pdb.prot5448.

Google Scholar: [Author Only](#) [Title Only](#) [Author and Title](#)

Ou S, and Jiang N. 2018. LTR\_retriever: a highly accurate and sensitive program for identification of long terminal-repeat retrotransposons. *Plant Physiology* 176:1410–1422.

Google Scholar: [Author Only](#) [Title Only](#) [Author and Title](#)

Paesold, S., D. Borchart, T. Schmidt, D. Dechyeva. 2012. A sugar beet (*Beta vulgaris* L.) reference FISH karyotype for chromosome and chromosome-arm identification, integration of genetic linkage groups and analysis of major repeat family distribution. *Plant J.* 72:600-611.

Google Scholar: [Author Only](#) [Title Only](#) [Author and Title](#)

Panella, L., L.G. Campbell, I.A. Eujayl, R.T. Lewellen, and J.M. McGrath. 2015. USDA-ARS sugar beet releases and breeding over the past 20 years. *J. Sugar Beet Research* 52:22-67.

Google Scholar: [Author Only](#) [Title Only](#) [Author and Title](#)

Panella, L., R.T. Lewellen, and L.E. Hanson. 2008. Breeding for multiple disease resistance in sugar beet: Registration of FC220 and FC221. *J. Plant Registrations* 2:146–155.

Google Scholar: [Author Only](#) [Title Only](#) [Author and Title](#)

Pertea, M., Pertea, G.M., Antonescu, C.M., Chang, T.-C., Mendell, J.T., and Salzberg, S.L. 2015. StringTie enables improved reconstruction of a transcriptome from RNA-seq reads. *Nat. Biotechnol.* 33, 290–295.

Google Scholar: [Author Only](#) [Title Only](#) [Author and Title](#)

Petersen, T.N., Brunak, S., von Heijne, G., and Nielsen, H. 2011. SignalP 4.0: discriminating signal peptides from transmembrane

regions. *Nat. Methods* 8, 785–786.

Google Scholar: [Author Only](#) [Title Only](#) [Author and Title](#)

Pichersky, E., Logsdon, J. M., McGrath, J. M. and Stasys, R. A. 1991. Fragments of plastid DNA in the nuclear genome of tomato: prevalence, chromosomal location and possible mechanism of integration. *Molecular and General Genetics* 225:453-458.

Google Scholar: [Author Only](#) [Title Only](#) [Author and Title](#)

Pin, P.A., R. Benlloch, D. Bonnet, E. Wremeth-Weich, T. Kraft, J. Gielen, and O. Nilsson. 2010. An antagonistic pair of FT homologs mediates the control of flowering time in sugar beet. *Science* 330:1397-1400.

Google Scholar: [Author Only](#) [Title Only](#) [Author and Title](#)

Pin, P.A., W. Zhang, S.H. Vogt, N. Dally, B. Büttner, G. Schulze-Buxloh, N.S. Jelly, T.Y.P. Chia, E.S. Mutasa-Göttgens, J.C. Dohm, H. Himmelbauer, B. Weisshaar, J. Kraus, J.J.L. Gielen, M. Lommel, G. Weyens, B. Wahl, A. Schechert, O. Nilsson, C. Jung, T. Kraft, and A.E. Müller. 2012. The role of a pseudo-response regulator gene in life cycle adaptation and domestication of beet. *Current Biology* 22:1095-1101.

Google Scholar: [Author Only](#) [Title Only](#) [Author and Title](#)

Pucker B (2019) Mapping-based genome size estimation. bioRxiv preprint first posted online Apr. 13, 2019; doi: <http://dx.doi.org/10.1101/607390>.

Google Scholar: [Author Only](#) [Title Only](#) [Author and Title](#)

Putnam NH, O'Connell B, Stites JC, Rice BJ, Blanchette M, Calef R, Troll CJ, Fields A, Hartley PD, Sugnet CW, Haussler D, Rokhsar DS, Green RE. (2016) Chromosome-scale shotgun assembly using an in vitro method for long-range linkage. *Genome Res.* 26: 342-350.

Google Scholar: [Author Only](#) [Title Only](#) [Author and Title](#)

Roessler K, Muyle A, Diez CM, Gaut GRJ, Bousious A, Stitzer MC, Seymour DK, Doebley JF, Liu Q, Gaut BS (2019) The genome-wide dynamics of purging during selfing in maize. *Nature Plants* 5: 980-990.

Google Scholar: [Author Only](#) [Title Only](#) [Author and Title](#)

Schmidt T, Heslop-Harrison JS (1998) Genomes, genes and junk: the large-scale organization of plant chromosomes. *Trends Plant Sci* 3: 195-199.

Google Scholar: [Author Only](#) [Title Only](#) [Author and Title](#)

Schmidt, T., Jung, C., Metzlauff, M. (1991) Distribution and evolution of two satellite DNAs in the genus *Beta*. *Theor. Appl. Genetics* 82:793-799.

Google Scholar: [Author Only](#) [Title Only](#) [Author and Title](#)

Schondelmaier, J., and C. Jung. 1997. Chromosomal assignment of the nine linkage groups of sugar beet (*Beta vulgaris* L.) using primary trisomics. *Theor. Appl. Genet.* 95:590-596.

Google Scholar: [Author Only](#) [Title Only](#) [Author and Title](#)

Schwacke R, Ponce-Soto GY, Krause K, Bolger AM, Arsova B, Hallab A, Gruden K, Stitt M, Bolger ME, Usadel B (2019). MapMan4: A refined protein classification and annotation framework applicable to multi-omics data analysis. *Mol. Plant.* 12: 879–892.

Google Scholar: [Author Only](#) [Title Only](#) [Author and Title](#)

Simão FA, Waterhouse RM, Ioannidis P, Kriventseva EV, and Zdobnov EM (2015) BUSCO: assessing genome assembly and annotation completeness with single-copy orthologs. *Bioinformatics*, published online June 9, 2015, doi: 10.1093/bioinformatics/btv351

Google Scholar: [Author Only](#) [Title Only](#) [Author and Title](#)

Stanke, M., and Waack, S. (2003). Gene prediction with a hidden Markov model and a new intron submodel. *Bioinformatics* 19, ii215-ii225.

Google Scholar: [Author Only](#) [Title Only](#) [Author and Title](#)

Taguchi K, Kuroda Y, Okazaki K, Yamasaki M. (2019) Genetic and phenotypic assessment of sugar beet (*Beta vulgaris* L. subsp. *vulgaris*) elite inbred lines selected in Japan during the past 50 years. *Breeding Science* 69:255-265.

Google Scholar: [Author Only](#) [Title Only](#) [Author and Title](#)

Taguchi, K. (2014) Genetics and breeding studies on *Aphanomyces* root rot resistance of sugar beet, covers from the discovery of genetic resources to development of new varieties. *Breed. Res.* 16:186–191

Google Scholar: [Author Only](#) [Title Only](#) [Author and Title](#)

The UniProt Consortium (2017). UniProt: the universal protein knowledgebase. *Nucleic Acids Res.* 45, D158–D169.

Google Scholar: [Author Only](#) [Title Only](#) [Author and Title](#)

Trebbi D, McGrath JM (2009) Functional differentiation of the sugar beet root system as indicator of developmental phase change. *Physiologia Plantarum* 135: 84–97.

Google Scholar: [Author Only](#) [Title Only](#) [Author and Title](#)

Tuskan, G.A., DiFazio, S., Jansson, S., Bohlmann, J., Grigoriev, I., Hellsten, U., Putnam, N., Ralph, S., Rombauts, S., Salamov, A., et al. (2006). The Genome of Black Cottonwood, *Populus trichocarpa* (Torr. & Gray). *Science* 313, 1596–1604.

Google Scholar: [Author Only](#) [Title Only](#) [Author and Title](#)

Wang Y, Tang H, DeBarry JD, Tan X, Li J, Wang X, Lee TH, Jin H, Marler B, Guo H, Kissinger JC, Paterson AH. (2012) MCSanX: A toolkit for detection and evolutionary analysis of gene synteny and collinearity. *Nucleic Acids Res.* 40(7): e49.

Google Scholar: [Author Only](#) [Title Only](#) [Author and Title](#)

Whitney KD, Baack EJ, Hamrick JL, Godt MJW, Barringer BC, Bennett MD, Eckert CG, Goodwillie C, Kalisz S, Leitch IJ, Ross-Ibarra J. (2010) A role for nonadaptive processes in plant genome size evolution? *Evolution* 64: 2097–2109.

Google Scholar: [Author Only](#) [Title Only](#) [Author and Title](#)

**Yang W-D, Tan H-W, Zhu W-M (2016) SpinachDB: A well-characterized genomic database for gene family classification and SNP information of spinach. PLoS ONE 11: e0152706. doi:10.1371/journal.pone.0152706.**

Google Scholar: [Author Only](#) [Title Only](#) [Author and Title](#)

**Yang Y, Moore MJ, Brockington SF, Soltis DE, Wong GK, Carpenter EJ, Zhang Y, Chen L, Yan Z, Xie Y, Sage RF, Covshoff S, Hibberd JM, Nelson MN, Smith SA (2015) Dissecting molecular evolution in the highly diverse plant clade Caryophyllales using transcriptome sequencing. Mol Biol Evol 32:2001-2014.**

Google Scholar: [Author Only](#) [Title Only](#) [Author and Title](#)

**Yang, Z. (2007) PAML 4: Phylogenetic analysis by maximum likelihood. Molecular Biology and Evolution 24:1586-1591.**

Google Scholar: [Author Only](#) [Title Only](#) [Author and Title](#)
